# Supplementary material for: Photobiomodulation: lasers vs. light emitting diodes?
Source: Royal Society of Chemistry journal article supplement (doi:10.1039/c8pp00176f), 2018-07-13
Supplement: c8pp00176f1.xlsx [file c8pp00176f1.xlsx]

## Sheet: PBMLLLT database
Category	Sub-category		First author	Country	Year	Journal	Title	Study type	Sub-category 2 / animal model	λ nm	Φ mW	E W/cm2	Q J	H J/cm2	A	t sec	N	Results: positive ☺ / unclear/modest ☺ / negative ☹ ↑ ↓ →	Link
Brain	Alzheimer's Disease		Blivet	France (Montpellier)	2018	Alzheimer's & Dementia: Translational Research & Clinical Interventions	Neuroprotective effect of a new photobiomodulation technique against Aβ25–35 peptide–induced toxicity in mice: Novel hypothesis for therapeutic approach of Alzheimer's disease suggested	Mouse	LED phototherapy (with laser)	625 + 850								"The daily treatment with RGn500 applied during 10 minutes on both the head (10 Hz) and abdomen (10 Hz) inhibited this microglial activation (Fig. 5F) in a highly significant manner (P < .001, Fig. 5H)." "Results obtained in the hereby study suggest that PBM may represent a novel nonpharmacological therapeutic approach for the treatment of AD. The specific combination of PBM/static magnetic field…
Dermatology	Review		Jagdeo	USA (Sacramento, CA)	2018	Lasers Surg Med	Light-emitting diodes in dermatology: A systematic review of randomized controlled trials.	Systematic review	LED phototherapy	"Thirty-one original RCTs were suitable for review." "LEDs represent an emerging modality to alter skin biology and change the paradigm of managing skin conditions. Acne vulgaris, herpes simplex and zoster, and acute wound healing received grade of recommendation B. Other skin conditions received grade of recommendation C or D. Limitations of some studies include small patient sample sizes (n < 2…									PubMed
Edema	Limb ulcer		Sommer AP	Germany (Ulm)	2018	Photomed Laser Surg	Aging Is a Sticky Business.	Human Case report	LED phototherapy	670		0.078						"After the administration of two LED sessions (two per week), lymph leakage stopped concomitant with wound closure and good cicatrization (Fig. 1, inset on the left)." Note: In this paper, Sommer spends a lot of space criticizing Karu's cytochrome c oxidase theory. Now in 3/2018, I am not very convinced of his speculations.	PubMed
Eyes	Light-induced damage		Lu	Australia (Canberra)	2018	Exp Eye Res	670nm light treatment following retinal injury modulates Müller cell gliosis: Evidence from in vivo and in vitro stress models	Rat + in vitro	LED phototherapy	670							3	"We showed that early treatment with 670 nm light after PD reduced MC activation, lowering the retinal expression of GFAP and FGF-2. 670 nm light treatment mitigated the production of MC-related pro-inflammatory cytokines (including IL-1β), and reduced microglia/macrophage (MG/MΦ) recruitment into the outer retina following PD. This subsequently decreased photoreceptor loss, slowing the progressi…	PubMed
Muscle	Exercise		Beltrame	Canada & Brazil	2018	Lasers Med Sci	Light-emitting diode therapy (photobiomodulation) effects on oxygen uptake and cardiac output dynamics during moderate exercise transitions: a randomized, crossover, double-blind, and placebo-controlled study.	Human RCT/DB Crossover	LED phototherapy	630 + 830	1500 + 3000		540 /limb					"Comparisons revealed no statistical (p > 0.05) differences between LEDT and placebo, suggesting no significant changes in aerobic system dynamics. These results challenge earlier publications that reported changes in pulmonary O2 uptake during incremental exercise until exhaustion after LEDT. Perhaps, increments in peak pulmonary O2 uptake after LEDT may be a consequence of higher exercise toler…	PubMed
Muscle	Sprain injuries		de Moraes Prianti	Brazil (São José dos Campos)	2018	Lasers Med Sci	Evaluation of the therapeutic effects of led (λ627 ± 10 nm) on the initial phase of ankle sprain treatment: a randomised placebo-controlled clinical trial.	Human RCT/SB	LED phototherapy	627	60		100 (10p)		1.3 cm2	1670 (10p)	6	"The group treated with LED showed statistically decreased pain compared to the placebo group in both the VAS (85.79 vs 55.73%) and McGill questionnaire (83.33 vs 52.52%). The reduction of oedema in the LED group on the 3rd and 6th days after therapy was statistically superior to that in the placebo (p < 0.0001). Based on the results of this study, treatment with LED, using the tested dose, is ef…	PubMed
Muscle	Exercise		Dellagrana	Brazil (Santa Catarina)	2018	J Strength Cond Res	Photobiomodulation Therapy on Physiological and Performance Parameters During Running Tests: Dose-Response Effects.	Human RCT/DB Crossover	LED phototherapy (w/ also some laser diodes) (Biphasic dose response)	670 (LED) + 850 (laser) + 880 (LED) + 950 (LED)			210 420 840 (14p)					"All PBMT doses positively affected physiological and/or performance parameters; however magnitude-based inference reported that PBMT applied with 30 J led to more beneficial effects than 15 J and 60 J."	PubMed
Oral	Periodontium (in vitro)		Yamauchi	Japan (Osaka)	2018	J Periodontol	High-power, red light-emitting diode irradiation enhances proliferation, osteogenic differentiation and mineralization of human periodontal ligament stem cells via ERK signaling pathway	In vitro	LED phototherapy	650				0- 10				"The results of this study show that 650-nm high-power, red, LED irradiation increases PDLSCs proliferation, and osteogenic differentiation and mineralization, mediated by ERK1/2 activation. These findings suggest that LED may be a useful tool for periodontal tissue regeneration."	Wiley
Bone	Bone repair		Diamantino	Brazil (São José dos Campos)	2017	Lasers Med Sci	Effect of non-coherent infrared light (LED, λ945 ± 20 nm) on bone repair in diabetic rats-morphometric and spectral analyses.	Rat	Diabetic rats LED phototherapy	945	48	--	2018-05-11	14.4	0.8 cm2	240	7 11 14	"It can be concluded that LED therapy positively influences bone formation in the early stages of the bone repair process in non-diabetic and diabetic animals, without causing changes in the optical density and volume of tissue in the final stages. No influence of LED therapy was observed on the percentage of calcium, percentage of phosphorus, Ca/P ratio, or optical mineral density in non-diabeti…	PubMed
Bone	Fractures		Baek	Korea (Seoul)	2017	J Craniomaxillofac Surg	The effect of light-emitting diode (590/830 nm)-based low-level laser therapy on posttraumatic edema of facial bone fracture patients.	Human Prospective cohort	Edema LED phototherapy HEALITE II device	590+ 830						1060	10	"Our analysis showed a 16.5% reduction of edema in the LLLT group and 7.3% in the sham light group. The edema reduction was statistically significantly greater in the LLLT group than in the sham light group (p < 0.047)." "LED-based LLLT is recently receiving attention worldwide for its cost-effectiveness and large coverage area compared to traditional laser therapy. Recent studies support its eff…	PubMed
Brain	Stroke		Lee	Korea (Yangsan)	2017	J Biophotonics	Low-level light emitting diode therapy promotes long-term functional recovery after experimental stroke in mice.	Mouse	LED phototherapy	610		0.0017						"The acute and subacute LED-T groups showed a significant improvement in motor function up to 28 days post-ischemia, although no brain atrophy recovery was noted. We observed proliferating cells (BrdU+ ) in the ischemic brain, and significant increases in BrdU+ /GFAP+ , BrdU+ /DCX+ , BrdU+ /NeuN+ , and CD31+ cells in the subacute LED-T group. However, the BrdU+ /Iba-1+ cell count was reduced in t…	PubMed
Cells	Proliferation		Vale	Brazil (São Paulo)	2017	Photomed Laser Surg	The Effects of Photobiomodulation Delivered by Light-Emitting Diode on Stem Cells from Human Exfoliated Deciduous Teeth: A Study on the Relevance to Pluripotent Stem Cell Viability and Proliferation.	In vitro	Stem cells from "milk teeth" (deciduous teeth) LED phototherapy	630	75	0.037		2 4 8 16 32				"LED irradiation at 630 nm (37 mW/cm2, 75 mW) with radiant exposure of 16 J/cm2 was capable of inducing a proliferative response in stem cells from the pulp tissue of deciduous teeth without affecting mitochondrial function or inducing senescence."	PubMed
Circulation	Microcirculation		Frangez	Slovenia (Ljubljana)	2017	Lasers Med Sci	The effect of LED on blood microcirculation during chronic wound healing in diabetic and non-diabetic patients-a prospective, double-blind randomized study.	Human RCT/DB	Chronic lower limb wounds Diabetic patients (and non-diabetic) LED phototherapy	625+ 660+ 850				2.4			24	"A significant increase in blood flow was noted in the treated group of diabetic and non-diabetic patients (p = 0.040 and p = 0.033), while there was no difference in the control groups. Additional Falanga wound bed score evaluation showed a significant improvement in both treated groups as compared to the control group." Comment: The control group used a broadband light source (580-900nm broadba…	PubMed
Dermatology	Radiation dermatitis		Strouthos	Germany (Offenbach)	2017	Strahlenther Onkol	Photobiomodulation therapy for the management of radiation-induced dermatitis : A single-institution experience of adjuvant radiotherapy in breast cancer patients after breast conserving surgery.	Human Controlled	LED phototherapy LED cluster (69)	660 + 805	1390 total	0.0446				240- 300		"In the PBM group, 22 patients (88%) presented grade 1 and 3 (12%) grade 2 RD. In the control group, 25 patients (55.6%) developed grade 1 reactions, 18 patients (40%) grade 2, and 2 (4.4%) patients grade 3 RD." "Concerning pain intensity, 15 patients (60%) of the PBM treatment arm reported no pain, 5 patients (20%) VAS 2, and 5 (20%) VAS 3. In the control group, 13 patients (28.9%) reported no p…	PubMed
Eyes	Light-induced damage		Lu	Australia (Canberra)	2017	Exp Eye Res	Photobiomodulation with 670 nm light ameliorates Müller cell-mediated activation of microglia and macrophages in retinal degeneration.	Rat	LED phototherapy	670				9				"The present study has demonstrated that treatment with 670 nm light mitigates Ccl2 and Il-1β expression in the retina in vivo, and in primary Müller cells in vitro. Further, we found that 670 nm light-treated Müller cells were able to mitigate MG/MΦ activation. This indicates that 670 nm light targets the expression of pro-inflammatory cytokines and chemokines by Müller cells. Previous studies h…	PubMed
Fibromyalgia			da Silva	Brazil (São Paulo)	2017	Lasers Med Sci	Randomized, blinded, controlled trial on effectiveness of photobiomodulation therapy and exercise training in the fibromyalgia treatment.	Human RCT/DB	Single session vs 10 weeks Control vs PBM vs exercise vs exercise+PBM LED phototherapy LED array	640 + 875 + 905			39.3 /p					"Set 1: pain threshold was improved with the phototherapy, and EXT improved the pain threshold for temporomandibular joint (right and left body side) and occipital site (right body side). Set 2: there was improved pain threshold in several tender points with the phototherapy and EXT. There was an overlap of therapies to reduce the tender point numbers, anxiety, depression, fatigue, sleep, and dif…	PubMed
Gastroenterology	Surgery		Redkin	Russia (Voronezh)	2017	Photomed Laser Surg	Reduce Adverse Effects of Laparoscopic Cholecystectomy with Pulse Width Modulated LED Light (625 nm, 76 Hz, 23% Duty Cycle).	Human RCT	LED phototherapy Svetozar-PRO device	625	30	0.015- 0.030		0.9- 1.8				"The test group revealed significant reduction in postsurgery gain of levels of ALT, AST, and ESR compared with the control group." "Treatment of the removed gallbladder bed and porta hepatis by red LED PWM radiation during LCE significantly reduces the adverse effects of surgery while increasing its time insignificantly and does not affect the surgical best practices deployed."	PubMed
Muscle	Exercise		Ferreira Junior	Brazil (Ponta Grossa)	2017	Lasers Med Sci	Cardiac autonomic responses and number of repetitions maximum after LED irradiation in the ipsilateral and contralateral lower limb.	Human RCT/SB (?)	LED phototherapy	660 + 850	340 + 1050		41.7 /p (total 834J per session)					"It was observed that active LEDI promoted an increase in maximal number of repetitions (LEDI = 44.4 ± 9.0 vs placebo = 39.9 ± 11.4; p < 0.05) and decreases the fatigue index (LEDI = 34.3 ± 21.8% vs placebo = 50.0 ± 26.6%; p < 0.05) comparing to placebo situation, only in the ipsilateral application. There were no differences on [Lac] and in HRV parameters comparing LEDI vs placebo on post-exerci…	PubMed
Muscle	Exercise		Ferreira Junior	Brazil (Ponta Grossa)	2017	Lasers Med Sci	Effects of light-emitting diode irradiation on time to exhaustion at maximal aerobic speed.	Human RCT/SB	LED phototherapy LED cluster (34+35)	660 + 850	340 + 1050							"In this study, it was observed that after applying LED irradiation, there was a tendency to an increase on Tlim and the smallest worthwhile changes presented a high chance of a beneficial effect (82.1%). Furthermore, the LED irradiation improved the HR response during the constant load exercise in comparison with the placebo situation."	PubMed
Muscle	Exercise		De Marchi	Brazil (Caxias do Sul)	2017	Lasers Med Sci	Does photobiomodulation therapy is better than cryotherapy in muscle recovery after a high-intensity exercise? A randomized, double-blind, placebo-controlled clinical trial.	Human RCT/DB	LED phototherapy LED cluster (34+35)	660 + 850	340 + 1050		41.7		13.8 cm2 (0.2 /LED)	30		↓DOMS, ↓CK (serum), ↓TBARS (serum), ↓oxidative damage (serum), ↑MVC (post-exercise) "The clinical impact of these findings is clear because they demonstrate that the use of phototherapy is more effective than the use of cryotherapy for muscle recovery, additionally cryotherapy decreases PBMT efficacy."	PubMed
Muscle	Exercise		Miranda	Brazil (São Paulo)	2017	Lasers Med Sci	When is the best moment to apply photobiomodulation therapy (PBMT) when associated to a treadmill endurance-training program? A randomized, triple-blinded, placebo-controlled clinical trial.	Human RCT/DB	LED phototherapy (w/ 905nm laser diode) Treadmill training	640 + 875 + 905								"Our outcomes show that PBMT applied before and after endurance-training exercise sessions lead to improvement of endurance three times faster than exercise only." Comment: The results are very remarkable. However, it's interesting that the results were published in such a moderate-impact journal (2.5). Note: "Professor Ernesto Cesar Pinto Leal-Junior received research support from Multi Radiance…	PubMed
Muscle	Myopathy		Albuquerque-Pontes	Brazil (São Paulo)	2017	Lasers Med Sci	Photobiomodulation therapy protects skeletal muscle and improves muscular function of mdx mice in a dose-dependent manner through modulation of dystrophin.	Mouse	Mdx mice LED phototherapy (w/ 905nm laser diode) Dose response (a strong one!)	640 + 875 + 905			1 3 10					"We conclude that PBMT can mainly preserve muscle morphology and improve muscular function of mdx mice through modulation of gene and protein expression of dystrophin. Furthermore, since PBMT is a non-pharmacological treatment which does not present side effects and is easy to handle, it can be seen as a promising tool for treating Duchenne's muscular dystrophy."	PubMed
Oral	Nerves		Mohajerani	Iran (Tehran)	2017	J Craniofac Surg	Effect of Low-Level Laser and Light-Emitting Diode on Inferior Alveolar Nerve Recovery After Sagittal Split Osteotomy of the Mandible: A Randomized Clinical Trial Study.	Human RCT/DB	LED phototherapy	632 (LED) + 810 (laser)								"After 1 week, the VAS score in the laser group significantly improved in comparison with the control group. Visual analog scale score improvement was 25% (P = 0.015) at 2 weeks, 21% (P = 0.001) at 2 months, and 24% (P = 0.001) at 6 months. After 2 weeks, the brush stroke score improvement was significant in the laser group. The improvement values were 21.5% (P = 0.002) at 2 months and 15.1% (P =…	PubMed
Pancreas	Type I diabetes		Tatmatsu-Rocha	Brazil (São Carlos)	2017	Lasers Med Sci	Light-emitting diode modulates carbohydrate metabolism by pancreatic duct regeneration.	Mouse	LED phototherapy	805	40		0.88	4.49	0.196 cm2	22	5	"Diabetic group treated with LED showed regeneration of islets and ducts (p = 0.001) on the pancreas. Intraperitoneal insulin tolerance test showed differences between the diabetic control and diabetic treated groups (p = 0.03). In diabetic control group, the hepatic glycogen content was 296% lower when compared with diabetic treated with LED. Furthermore, in the diabetic control group, the glyco…	PubMed
Respiratory system	Lung inflammation		Siqueira	Brazil (São Paulo)	2017	J Biophotonics	Light-Emitting Diode treatment ameliorates allergic lung inflammation in experimental model of asthma induced by ovalbumin.	Mouse	Ovalbumin-induced experimental asthma in Balb/c mice LED phototherapy	660	100	0.0333	15	5	2.8 cm2	150	2 + 2 + 2 = 6 (?)	"Our results showed that LED treatment in asthmatic mice reduced the lung cell infiltration, the mucus production, the oedema, and the tracheal's contractile response." "This study may provide important information about the effects of LED, and in addition, it may open the possibility of a new approach for the treatment of asthma."	PubMed
Skin	Flap		Park	Korea (Cheonan)	2017	Lasers Med Sci	Human adipose-derived stem cell spheroid treated with photobiomodulation irradiation accelerates tissue regeneration in mouse model of skin flap ischemia.	Mouse	Adipose-derived stem cells treatment LLLT + stem cells LED phototherapy	660		0.01		6		600		"The PBM-spheroid hASCs transplanted into the skin flap ischemia differentiated into endothelial cells and remained differentiated. Transplantation of PBM-spheroid hASCs into the skin flap ischemia significantly elevated the density of vascular formations through angiogenic factors released by the skin flap ischemia and enhanced tissue regeneration at the lesion site. Consistent with these result…	PubMed
Skin	Flap		Moon	Korea (Cheonan)	2017	Lasers Med Sci	Enhanced survival of ischemic skin flap by combined treatment with bone marrow-derived stem cells and low-level light irradiation.	Mouse	LED phototherapy	850		0.05		39		780	5	"LLLI promoted BMSC migration and tube formation. The flap survival rate of combined treated group was significantly higher than that of the control group. Histologic results demonstrated a significant increase in neovascularization in the combined treatment group. This study demonstrates that combination treatment of BMSCs and LLLI could enhance the survival of ischemic skin flap in a mouse mode…	PubMed
Wound healing	Surgical wounds		Barros	Brazil (Teresina)	2017	Lasers Med Sci	Low-intensity LED therapy (λ 640 ± 20 nm) on saphenectomy healing in patients who underwent coronary artery bypass graft: a randomized, double-blind study.	Human RCT/DB	LED phototherapy	640 ± 20				6				"The results showed that in the experimental group, there were less bleeding points and no dehiscence in saphenectomy, as compared to the placebo group. There was also a smaller area of hematoma and hyperemia in the experimental group (p < 0.0009). These data lead to the conclusion that the type of phototherapy protocol employed can assist in tissue repair."	PubMed
Wound healing	Wounds		Zhang	China (Shanghai)	2017	Photochem Photobiol	LED Phototherapy With Gelatin Sponge Promotes Wound Healing in Mice.	Mouse	LED phototherapy	465 and/or 625								"Results showed that the red and blue lights promoted cell growth and wound healing, while the blue light with a gelatin sponge protected the wound from infection in the early stages of wound healing."	PubMed
Autoimmunity	Pemphigus vulgaris		Yousef	Iran (Tehran)	2017	J Lasers Med Sci	The Effect of Low Level Laser Therapy on Pemphigus Vulgaris Lesions: A Pilot Study.	Human	LED phototherapy	660	30	-	-	-	-	-	6 in 2wk	"Application of low level laser simultaneously with conventional therapy could result in sensational healing of ulcers especially in patients who do not respond to conventional treatment or suffering from recalcitrant lesions." Comment: Parameters were poorly reported.	PubMed
Bone	Osteoclastogenesis		Sohn	Korea (Gwangju)	2017	Lasers Med Sci	Comparison of the alendronate and irradiation with a light-emitting diode (LED) on murine osteoclastogenesis.	In vitro	LED phototherapy	635		0.005	18		d = 9 cm	3600		"These findings suggest that LED irradiation downregulates osteoclastogenesis by ROS production; this effect could lead to reduced bone loss and may offer a new therapeutic tool for managing osteoporosis."	PubMed
Bone	Osteoclastogenesis		Lee	Korea (Gwangju)	2017	Photomed Laser Surg	Regulation of RANKL-Induced Osteoclastogenesis by 635-nm Light Emitting Diode Irradiation Via HSP27 in Bone Marrow-Derived Macrophages.	In vitro	LED phototherapy	635								"The 635-nm irradiation treatment significantly increased HSP27 expression and decreased intracellular ROS generation, as well as p38 and AKT phosphorylation, leading to reductions in the expression of c-fos, NFATc1, and DC-STAMP and TRAP activation and osteoclastic bone resorption in RANKL-induced BMMs. However, in HSP27-silenced BMMs, no change was observed."	PubMed
Bone	Bone repair		Pinheiro	Brazil (Salvador, Bahia)	2017	Lasers Med Sci	Biochemical changes on the repair of surgical bone defects grafted with biphasic synthetic micro-granular HA + β-tricalcium phosphate induced by laser and LED phototherapies and assessed by Raman spectroscopy.	Rat	LED phototherapy LLLT vs LED	780 laser 850 LED	70 150	--	-	20 20 (unclear)	0.04 cm2 0.5 cm2		7?	"These results indicated that the use of laser phototherapy improved the repair of bone defects grafted with the biomaterial by increasing the deposition of phosphate HA."	PubMed
Brain	Stroke		Lee	Korea (Yangsan)	2017	Biochem Biophys Res Commun	Pretreatment with light-emitting diode therapy reduces ischemic brain injury in mice through endothelial nitric oxide synthase-dependent mechanisms	Mouse	LED phototherapy	610		0.0017		2		1200	4	"After reperfusion, the LED-T group showed significantly smaller infarct and edema volumes, fewer behavioral deficits compared to injured mice that did not receive LED-T and significantly higher cerebral blood flow compared to the vehicle group. We observed lower levels of endothelial nitric oxide synthase (eNOS) phosphorylation in the injured mouse brains, but significantly higher eNOS phosphory…	PubMed
Brain	Stroke		Lee	Korea (Yangsan)	2017	J Biophotonics	Low-level light emitting diode (LED) therapy suppresses inflammasome-mediated brain damage in experimental ischemic stroke.	Mouse	LED phototherapy Microglia	610		0.0017		2	d = 4 mm	1200	6	"LED therapy group generated a significantly smaller infarct size and improvements in neurological function based on neurologic test score. LED therapy profoundly reduced neuroinflammatory responses including neutrophil infiltration and microglia activation in the ischemic cortex. LED therapy also decreased cell death and attenuated the NLRP3 inflammasome, in accordance with down-regulation of pr…	PubMed
Brain	Alzheimer's Disease		da Luz Eltchechem	Brazil (Guarapuava)	2017	Lasers Med Sci	Transcranial LED therapy on amyloid-β toxin 25-35 in the hippocampal region of rats.	Rat	LED phototherapy Transcranial LLLT	627	70			7		100	21	"Our study indicates the beneficial effect of PBM treatment on behavioral tasks in the early stages of AD by demonstrating the improvement in motor and behavioral performance in treated animals compared to nontreated ones." "The use of PBM in rats with AD showed a significant reduction in senile plaques after 21 days of treatment in the treated group compared to the nontreated group." "The early …	PubMed
Brain	Cognitive performance		Grover	USA (Denver, CO)	2017	Photomed Laser Surg	Acute Effects of Near Infrared Light Therapy on Brain State in Healthy Subjects as Quantified by qEEG Measures.	Human	LED phototherapy LED array (784)	903		0.0167		20	360 cm2			"Change in reaction time significantly differed between treated and control, with a mean of 23.8 msec improvement compared with controls (p = 0.035). Amplitude increased an average of 0.81 μV in treatment versus 0.22 μV in controls and did not reach significance." "The data suggest that NIR light may have an acute effect on reaction time and amplitude in certain subject subsets. There were no adv…	PubMed
Brain	Parkinson's disease		El Massri	Australia & France	2017	Exp Brain Res	Photobiomodulation-induced changes in a monkey model of Parkinson's disease: changes in tyrosine hydroxylase cells and GDNF expression in the striatum.	Monkey Rat Mouse LED phototherapy	MPTP (6-OHDA rats) LED phototherapy	670								"In our MPTP monkey model, which showed a clear loss in striatal dopaminergic terminations, PBM generated a striking increase in striatal TH+ cell number, 60% higher compared to MPTP monkeys not treated with PBM and 80% higher than controls." "This increase was not evident in our MPTP mouse and 6OHDA rat models, both of which showed minimal loss in striatal terminations." "In monkeys, the increas…	PubMed
Cells	Proliferation		Naderi	Iran (Tehran)	2017	J Lasers Med Sci	A Comparative Study of 660 nm Low-Level Laser and Light Emitted Diode in Proliferative Effects of Fibroblast Cells.	In vitro	LED phototherapy LLLT vs LED Biphasic dose response	660	35			1 5 10				"In contrast to LLL, LED light had no significant impact on the proliferation of Hu02 cells" "Our findings showed that production of ROS within the cell was linearly increased both in the LED and laser light irradiated cells. However, laser light is more incremental in comparison to LED light. "	PubMed
Circulation	Angiogenesis		Park	Korea (Cheonan)	2017	Cytotherapy	Adipose-derived stem cell spheroid treated with low-level light irradiation accelerates spontaneous angiogenesis in mouse model of hindlimb ischemia.	Mouse (in vitro irradiation)	Stem cells LED phototherapy	660		0.010				600	3	"These findings suggest that transplantation of ASC spheroid treated with LLLI may be an effective stem cell therapy for the treatment of hind-limb ischemia and peripheral vascular disease."	PubMed
Diabetes mellitus	Ulcers and wounds		Salvi	Italy (Turin)	2017	J Biomed Opt	Effect of low-level light therapy on diabetic foot ulcers: a near-infrared spectroscopy study.	Human	Healite II LED phototherapy	830								"Overall, our results demonstrate that LLLT improves blood flow and autonomic nervous system regulation in DFU and the importance of light intensity in therapeutic protocols."	PubMed
Eyes	Age-related macular degeneration		Sivapathasuntharam	UK (London)	2017	Neurobiol Aging	Aging retinal function is improved by near infrared light (670 nm) that is associated with corrected mitochondrial decline.	Mouse	LED phototherapy	670								"Significant age-related declines were measured in the photoreceptor generated a-wave and the postreceptoral b-wave. Seven- and 12-month-old mice were exposed to 670 nm for 15 minutes daily over 1 month. These showed significant improved retinal function in both waves of approximately 25% but did not reach levels found in 2-month-old animals. Our data suggest, 670 nm light can significantly impro…	PubMed
Eyes	Occipital cortex		Ghanbari	Iran (Yasuj)	2017	Biomed Pharmacother	Light-Emitting Diode (LED) therapy improves occipital cortex damage by decreasing apoptosis and increasing BDNF-expressing cells in methanol-induced toxicity in rats.	Rat	LED phototherapy Brain (occipital cortex)	670		0.028		4		144	7	"LED therapy significantly reduced RGC death, in comparison to the methanol group. In addition, the number of BDNF positive cells was significantly higher in the visual cortex of LED-treated group, in comparison to methanol-intoxicated and control groups. Moreover, LED therapy caused a significant decrease in cell death (caspase 3+ cells) and a significant reduction in the NO levels, both in seru…	PubMed
Eyes	Diabetic retinopathy		Cheng	China & USA	2017	Diabetes	Photobiomodulation Inhibits Long-term Structural and Functional Lesions of Diabetic Retinopathy.	Mouse	LED phototherapy Diabetic nephropathy	670		0.025		5			8mo	"We administered photobiomodulation (PBM) therapy daily for 8 months to streptozotocin-diabetic mice, and assessed effects of PBM on visual function, retinal capillary permeability, and capillary degeneration using published methods. Vitamin D receptor and Cyp24a1 transcripts were quantified by qRT-PCR, and the abundance of c-Kit+ stem cells in blood and retina were assessed. Long-term daily admi…	PubMed
General	LED		Dong & Xiong	China (Suzhou)	2017	Ann Biomed Eng	Applications of Light Emitting Diodes in Health Care.	Review	LED phototherapy	"Despite the fast advances in both LED technologies and their applications, few reviews have been seen to link the controllable emission properties of LEDs to these applications. The objective of this paper is to bridge this gap by reviewing the main control techniques of LEDs that enable creating enhanced lighting patterns for imaging and generating effective photon doses for photobiomodulation.…									PubMed
General	LED		Calderhead & Tanaka	Korea	2017	BOOK: Photomedicine - Advances in Clinical Practice	Photobiological Basics and Clinical Indications of Phototherapy for Skin Rejuvenation	Review	LED phototherapy	"Photobiological basics and light/tissue interaction underlying the process will be examined, together with the importance of treatment parameters."									INTECH
Hair			Fonda-Pascual	Spain (Madrid)	2017	J Am Acad Dermatol	Effectiveness Of Low-Level Laser Therapy In Lichen Planopilaris.	Human Case series	LED phototherapy	630				4			900 /d for 6mo	"All patients responded with a global reduction of symptoms, erythema and perifollicular hyperkeratosis (Fig. 1a, Fig. 1b), with a mean decrease of 0.87 in LPPAI-score after six months of intervention (p=0.012) but not in the follow-up visit at three months. Terminal hair thickness after three months was greater than in the baseline (111.0 µm, p=0.018) as well as after six months (82.4 µm; p=0.03…	PubMed
Muscle	Exercise		Hemmings	USA (Statesboro, GA)	2017	J Strength Cond Res	Identifying Dosage Effect of Light-Emitting Diode Therapy on Muscular Fatigue in Quadriceps.	Human RCT/SB	LED phototherapy	660 + 850								"There was significant increase in the number of repetitions performed between the placebo treatment and 60 seconds (p = 0.023), as well as placebo and 120 seconds (p = 0.004) of irradiation on each point. There were no significant differences in blood lactate levels between any of the 4 trials. In conclusion, LEDT had a positive effect on performance when irradiating 6 points on the superficial …	PubMed
Muscle	Exercise-related health improvements		Paolillo	Brazil (São Carlos)	2017	J Cosmet Laser Ther	Effects of Phototherapy Plus Physical Training on Metabolic Profile and Quality of Life in Postmenopausal Women.	Human RCT	LED phototherapy LED array	850	100	0.039		108		2700		"Physical training with or without phototherapy may improve metabolic profile. In addition, phototherapy together with treadmill training prevented an increase in subcutaneous fat and facilitated improved quality of life in postmenopausal women."	PubMed
Muscle	Exercise		Dellagrana	Brazil (Florianópolis)	2017	Lasers Med Sci	Dose-response effect of photobiomodulation therapy on neuromuscular economy during submaximal running.	Human RCT/DB	LED phototherapy (28 LED diodes; 5 laser diodes) Biphasic dose response	670 + 850 + 880 + 950			15 30 60					"According to magnitude-based inference, PBMT with dose of 15 J per site showed possibly and likely beneficial effects on neuromuscular economy during running at 8 and 9 km h-1, respectively. On other hand, PBMT with doses of 30 and 60 J per site showed possible beneficial effects only during running at 9 km h-1. We concluded that PBMT improve neuromuscular economy and the best PBMT dose was 15 J…	PubMed
Oral	Nerves		Yucesoy	Turkey (Istanbul)	2017	J Oral Maxillofac Surg	Comparison of Ozone and Photo-Biomodulation Therapies on Mental Nerve Injury in Rats.	Rat	LED phototherapy	618		0.02		6		300	21	"A better healing pattern was observed in the treatment groups. The number of [Schwann cells] was markedly larger in the OT and PBM groups than in the control group." "This study clearly suggests that OT and PBM are promising novel methods for the treatment of mental nerve injury."	PubMed
Oral	Tooth replantation		Pigatto Mitihiro	Brazil (Londrina)	2017	Dent Traumatol	Effects of near-infrared LED therapy on experimental tooth replantation in rats.	Rat	LED phototherapy	940				4			3	"The results suggest that the application of LED therapy up to 48 h after tooth replantation may delay periodontal ligament repair."	PubMed
Oral	Tooth extraction		Comunian	Brazil (Belo Horizonte)	2017	Oral Maxillofac Surg	Photobiomodulation with LED and laser in repair of mandibular socket rabbit: clinical evaluation, histological, and histomorphometric.	Rabbit	LLLT vs LED LED phototherapy	780 laser 830 LED	? 26			30 30		50 150	9 9	"It was found that photobiomodulation with LASER and LED presented effects. However, only the LED demonstrated a beneficial effect on the process of bone repair in the dental alveoli of rabbits." Comment: The photograph of rabbit being treated by LED light looks a little bit funny.	PubMed
Pain	Nociception		Chia	Taiwan (Kaohsiung)	2017	Pain Res Manag	The Antinociceptive Effect of Light-Emitting Diode Irradiation on Incised Wounds Is Correlated with Changes in Cyclooxygenase 2 Activity, Prostaglandin E2, and Proinflammatory Cytokines.	Rat	Hind paw wound LED phototherapy	940	160			4		1800		"LED therapy attenuated the decrease in thermal withdrawal latency in all the irradiated groups and the decrease in the mechanical withdrawal threshold in the L-I group only. The expression levels of COX-2, PGE2, and IL-6 were significantly decreased in the three LED-treated groups, whereas IL-1β and TNF-α were significantly decreased only in the L-I group compared with their levels in the I grou…	PubMed
Pain	Acute		Pigatto	Brazil (Santa Maria)	2017	Mol Neurobiol	Light-Emitting Diode Phototherapy Reduces Nocifensive Behavior Induced by Thermal and Chemical Noxious Stimuli in Mice: Evidence for the Involvement of Capsaicin-Sensitive Central Afferent Fibers.	Mouse	LED phototherapy Dose response Biphasic dose response	890	(234) 390 (780)	0.0104 0.0173 0.0346						"Mice exposed to multisource LED (output power 234, 390, or 780 mW and power density 10.4, 17.3, and 34.6 mW/cm2, respectively, from 10 to 30 min of stimulation with a wavelength of 890 nm) showed rapid and significant reductions in formalin- and acetic acid-induced nocifensive behavior. This effect gradually reduced but remained significant for up to 7 h after LED treatment in the last model use…	PubMed
Respiratory system	Lung fibrosis		Brochetti	Brazil (São Paulo)	2017	Lasers Med Sci	Photobiomodulation therapy improves both inflammatory and fibrotic parameters in experimental model of lung fibrosis in mice.	Mouse	LED phototherapy Fibrosis induction by bleomycin	660	100	0.0333	15	5	2.8 cm2	150	8	"Our results showed that PBMT significantly reduced the number of inflammatory cells in the alveolar space, collagen production, interstitial thickening, and static and dynamic pulmonary elastance. In addition, we observed reduced levels of IL-6 e CXCL1/KC released by pneumocytes in culture as well as reduced level of CXCL1/KC released by fibroblasts in culture. We can conclude that the PBMT impr…	PubMed
Respiratory system	Lung injury (in sepsis)		Costa	Brazil (São Paulo)	2017	Sci Rep	Beneficial effects of Red Light-Emitting Diode treatment in experimental model of acute lung injury induced by sepsis	Mouse	Sepsis-induced acute lung injury LED phototherapy	660	100	0.033	15	5	2.8 cm2	150	2	"Red LED treatment reduced neutrophil influx and the levels of interleukins 1β, 17 A and, tumor necrosis factor-α; in addition to enhanced levels of interferon γ in the bronchoalveolar fluid. Moreover, red LED treatment enhanced the RNAm levels of IL-10 and IFN-γ. It also partially reduced the elevated oxidative burst and enhanced apoptosis, but it did not alter the translocation of nuclear facto…	Nature
Skin	Acne vulgaris		Li	USA (Skillman, NJ)	2017	Lasers Surg Med	Low-level red LED light inhibits hyperkeratinization and inflammation induced by unsaturated fatty acid in an in vitro model mimicking acne.	In vitro	LED phototherapy	637								"Low level red LED light therapy could provide beneficial effects of anti-inflammation, normalizing pilosebaceous hyperkeratinization, and improving barrier impairment in Acne vulgaris."	PubMed
Skin	Atopic dermatitis		Jekal	Korea	2017	Korean J Clin Lab Sci	The Combined Effects of Curcumin Administration and 630 nm LED Phototherapy against DNCB-induced Atopic Dermatitis-like Skin Lesions in BALB/c Mice	Mouse	LED phototherapy	630				5			10	"These results suggest that the combined therapy of curcumin and LED is more effective than a single treatment. We recommend that this can be a feasible alternative therapy to manage AD."	E-ScienceCentral
Skin	Atopic dermatitis		Cho	Korea (Seoul)	2017	Ann Dermatol	Therapeutic Effects of a Light Emitting Diode at a Variety of Wavelengths on Atopic Dermatitis-Like Skin Lesions in NC/Nga Mice.	Mouse	LED phototherapy	415 525 660 830								"In conclusion, our study demonstrates that LED phototherapy with longer wavelengths can improve AD-like skin lesions in NC/Nga mice, probably through regulation of both Th1 and Th2 responses. Thus, LED phototherapy with red and NIR wavelengths could be a potential phototherapeutic modality for AD management."	PubMed
Wound healing	Wounds		Li		2017	Zhongguo Yi Xue Ke Xue Yuan Xue Bao	Effects of 630 nm Red and 460 nm Blue Light Emitting Diode Irradiation on Healing of the Skin Wound in Japanese Big-ear White Rabbit.	Rabbit	LED phototherapy	460 + 630								"The healing rate in the red light,blue light,and control groups was 50.0%(4/8),25.0%(2/8),and 12.5%(1/8),respectively. Since the 12th day after modeling,the healing area percentage in the red light group was significantly higher than those in the blue light and control groups(P<0.05,P<0.01). On the 21st day after modeling,the skin thickness of the red light group was(2.95±0.34)mm,which was signi…	PubMed
Wound healing	Burns		de Oliveira	Brazil (Teresina)	2017	Lasers Med Sci	Low-intensity LED therapy (658 nm) on burn healing: a series of cases.	Human Case series	LED phototherapy (?)	658	40			7				"The burns treated with LED showed higher epithelization, with keratinocytes and fibroblasts proliferation, increased collagen synthesis, decreased pain, and pruritus. In conclusion, there was a faster clinical improvement in the irradiated limbs."	PubMed
Wound healing	Surgical wounds		Lima	Brazil (São Paulo)	2017	Photomed Laser Surg	Photobiomodulation (Laser and LED) on Sternotomy Healing in Hyperglycemic and Normoglycemic Patients Who Underwent Coronary Bypass Surgery with Internal Mammary Artery Grafts: A Randomized, Double-Blind Study with Follow-Up.	Human RCT/DB (?)	LLLT vs LED LED phototherapy	640 (laser) 660 (LED)				1.06 0.24				"LLLT and LED groups had similarly less hyperemia and less incision bleeding or dehiscence (p ≤ 0.005) and the outcomes were also analogous between hyperglycemic and normoglycemic patients, which indicates no difference observed in an intragroup analysis (p ≥ 0.05)."	PubMed
Adipose tissue	Inflammation		Yoshimura	Brazil (São Paulo)	2016	J Biophotonics	Photobiomodulation reduces abdominal adipose tissue inflammatory infiltrate of diet-induced obese and hyperglycemic mice.	Mouse	LED phototherapy	843	60	0.019	18	5.7	3.14 cm2	300	6	"Non-irradiated control animals display inflammatory areas almost five times greater than the treated group (p < 0.001). This result on inflammatory infiltrate may have caused impacts on the significant lower blood glucose level from irradiated animals (p = 0.04), twenty-four hours after the last irradiation session."	PubMed
Brain	Parkinson's disease		Reinhart	France & Australia	2016	J Neurosurg	Intracranial application of near-infrared light in a hemi-parkinsonian rat model: the impact on behavior and cell survival.	Mouse	6-OHDA LED phototherapy (Epitex SMT 670) Light delivery into the brain via optical fiber									"In summary, when delivered at the appropriate power, delivery mode, and dosage, NIr treatment provided both improved behavior and neuroprotection in 6-OHDA-lesioned rats." Comment: However, there were three NIR groups and it seems that the results weren't as straightforward as one would think...	PubMed
Brain	Parkinson's disease		Reinhart	France & Australia	2016	Neurosci Res	The behavioural and neuroprotective outcomes when 670 nm and 810 nm near infrared light are applied together in MPTP-treated mice	Mouse	MPTP LED phototherapy	670 + 810								"Our results showed that when 670nm and 810nm NIr were applied both together and sequentially, there was a greater overall beneficial outcome - increased locomotor activity and number of tyrosine hydroxylase immunoreactive cells in the substantia nigra pars compacta - than when they were applied either separately, or in particular, both together and concurrently." Note: In this paper, they had 6 …	PubMed
Brain	Parkinson's disease		El Massri	Australia & France	2016	Int J Neurosci	The effect of different doses of near infrared light on dopaminergic cell survival and gliosis in MPTP-treated mice.	Mouse	MPTP LED phototherapy									"In summary, we showed that neuroprotection by NIr irradiation in MPTP-treated mice was dose-dependent; with increasing MPTP toxicity, higher doses of NIr were required to protect cells and reduce astrogliosis."	PubMed
Brain	Parkinson's disease		Reinhart	France & Australia	2016	Exp Brain Res	Near-infrared light (670 nm) reduces MPTP-induced parkinsonism within a broad therapeutic time window.	Mouse	MPTP LED phototherapy Epitex devices (models 670-66-60 and 810-66-60)	670		0.0053 (mid- brain)		0.5 (mid- brain)		90	4- 12	"In summary, irrespective of whether it was applied before, at the same time as or after MPTP insult, NIr reduced both behavioural and structural measures of damage by a similar magnitude." "There was a broad therapeutic time window of NIr application in relation to the stage of toxic insult, and the NIr was fast-acting and long-lasting." Star: The paper included a photograph of LLLT application.	PubMed
Cells	Protection		Knels	Germany (Dresden)	2016	Photochem Photobiol	Effects of Narrow-band IR-A and of Water-Filtered Infrared A on Fibroblasts.	In vitro	LED phototherapy Water-filtered infrared A (wIRA; broadband light) LED vs wIRA 3T3 fibroblasts	670- 1400 (wIRA) 875 (LED)								"The numbers of apoptotic cells were reduced in cultures irradiated with wIRA or LED-IR-A. More mitochondria showed a well-polarized MMP after wIRA irradiation in glyoxal damaged cells. LED-IR-A treatment specifically restored the GSH/GSSG ratio. The immediate positive effects of wIRA and LED-IR-A observed in living cells, particularly on mitochondria, reflect the therapeutic benefits of wIRA and…	PubMed
Circulation	Thrombocytopenia		Yang	USA (Boston, MA)	2016	Sci Rep	Low-level light treatment ameliorates immune thrombocytopenia.	Mice & in vitro	LED phototherapy Biphasic dose response	830		0.02		36		1800	1	"These adverse effects of anti-CD41 antibody were all mitigated by LLLT to varying degrees, owing to its ability to enhance mitochondrial biogenesis and activity in megakaryocytes and preserve mitochondrial functions in platelets in the presence of the antibody. The observations argue not only for contribution of mitochondrial stress to the pathology of ITP, but also clinical potentials of LLLT a…	PubMed
Eyes	Age-related macular degeneration		Merry	Canada (Toronto)	2016	Acta Ophthalmol	Photobiomodulation reduces drusen volume and improves visual acuity and contrast sensitivity in dry age-related macular degeneration.	Human Case series (n=42)	Dry age-related macular degeneration LED phototherapy (Warp10 + Gentlewaves)	670 + 590 + 790	? + 4 + 0.6	0.05- 0.08		4.00- 7.68 + 0.1		88 + 35 + 35	9 / 3wk	"Significant improvement in mean BCVA of 5.90 letters (p < 0.001) was seen on completion of the 3-week treatment and 5.14 letters (p < 0.001) after 3 months. Contrast sensitivity improved significantly (log unit improvement of 0.11 (p = 0.02) at 3 weeks and 3 months (log unit improvement of 0.16 (p = 0.02) at three cycles per degree. Drusen volume decreased by 0.024 mm3 (p < 0.001) and central dr…	PubMed
Eyes	Metabolism		Kaynezhad	UK (London)	2016	Exp Eye Res	Optical monitoring of retinal respiration in real time: 670 nm light increases the redox state of mitochondria.	Rat	LEd phototherapy	670	2016-05-03					300		"Retinae of aged rats exposed to 670 nm for 5 mins showed consistent progressive increases in oxidation of COX 5 mins post exposure."	PubMed
Eyes	Light-induced damage		Chu-Tan	Australia (Canberra)	2016	Int J Photoenergy	Efficacy of 670 nm Light Therapy to Protect against Photoreceptor Cell Death Is Dependent on the Severity of Damage	Rat	LED phototherapy Light-induced damage	670		0.06		9 18 36 90		180 360 720 1800		"670 nm light exhibited a biphasic response in its amelioration of cell death in light-induced degeneration in vivo. Lower light damage intensities required lower doses of 670 nm light to reduce TUNEL cell death. At higher damage intensities, the highest dose of 670 nm light showed protection. In vitro, the Seahorse XFe96 Extracellular Flux Analyzer revealed that 670 nm light directly influences …	Hindawi
Eyes	Optic nerve injury		Beirne	UK (Cardiff)	2016	Photochem Photobiol	Red Light Treatment in an Axotomy Model of Neurodegeneration.	Ex vivo (mouse)	LED phototherapy Optic nerve injury (axotomy)	670				31.7		528		"The results demonstrate the ability of 670 nm light to partially prevent ex vivo dendropathy in the mouse retina, suggesting that it is worth exploring as a treatment option for dendropathy-associated neurodegenerative diseases, including glaucoma and Alzheimer's disease."	PubMed
Fertility, genitals, etc.	Dysmenorrhea		Hong	Korea (Iksan & Yangsan)	2016	Int J Gynaecol Obstet	Randomized controlled trial of the efficacy and safety of self-adhesive low-level light therapy in women with primary dysmenorrhea.	Human RCT/DB Multicenter	LED phototherapy	610		0.0018				1200	5	"At the final study visit, the reduction in scores using a visual analog scale was significantly greater in patients who received low-level light therapy (n=41; 4.34±2.22) than among those in the control group (n=38; 1.79±1.73; P<0.001 when adjusted for age) No serious adverse events occurred." "There was significantly less use of analgesia in the experimental group than in the control group (P =…	PubMed
Fluorescent lamps			Ahamed	India	2016	Lasers Med Sci	Effect of LED photobiomodulation on fluorescent light induced changes in cellular ATPases and Cytochrome c oxidase activity in Wistar rat.	Rat	LED phototherapy	670		0.025		9	whole animal (?)	360		"This study demonstrates the protective effect of 670 nm LED pre exposure on cellular enzymes against fluorescent light induced change." Note: See also the another paper from this group, in the Eyes-category.	PubMed
Gastroenterology	Colitis		Belém	Brazil (Londrina)	2016	J Photochem Photobiol B	Light-emitting diodes at 940nm attenuate colitis-induced inflammatory process in mice.	Mouse	LED phototherapy LLLT vs prednisolone Acetic acid-induced colitis	940	270		64.8	4.05		240		"Colitis-induced intestinal transit delay was inhibited by LED therapy. Colitis caused an increase of colon dimensions (length, diameter, total area) and colon weight (edema), which were inhibited by LED therapy. LED therapy also decreased colitis-induced tissue gross lesion, myeloperoxidase activity, microscopic tissue damage score and the presence of inflammatory infiltrate in all intestinal la…	PubMed
Hearing			Bartos	USA (Boston, MA)	2016	J Biophotonics	Pre-conditioning with near infrared photobiomodulation reduces inflammatory cytokines and markers of oxidative stress in cochlear hair cells.	In vitro	Cochlear hair cells treated with gentamicin or LPS LED phototherapy	810		0.03		1	3	100	1	"We report a decrease of inflammatory cytokines and stress levels resulting from NIR applied to HEI-OC1 auditory cells before treatment with gentamicin or lipopolysaccharide."	PubMed
Heart	Heart failure		Capalonga	Brazil (Porto Alegre)	2016	Lasers Med Sci	Light-emitting diode therapy (LEDT) improves functional capacity in rats with heart failure.	Rat	LED phototherapy	850	50	0.250	6	15	0.2 cm2	60 /point	40	"Sham and LEDT-HF groups showed higher relative values than the Control-HF group, respectively, for distance covered (27.7 and 32.5 %), time of exercise test (17.7 and 20.5 %), and speed (13.6 and 12.2 %)." Note: In this paper, the "sham" group does not refer to sham-therapy, but instead to sham-HF.	PubMed
Immunity	Monocytic cells (U937)		Spoto	Italy (Chieti)	2016	J Biol Regul Homeost Agents	Effect of low energy light irradiation by light emitting diode on U937 cells.	In vitro	LED phototherapy	880								"We demonstrate that LED exposure, in the presence or absence of lipopolysaccharide (LPS), activates cell degranulation, increased expression of Interleukin-8 (IL-8) and modulation of beta galactosidase activity. Evidence shows that the well-known pro-inflammatory nuclear factor kappa-light-chain-enhancer of activated B cells (NF-kB) and the apoptotic marker (caspase3/cleaved-caspase3 ratio) are …	PubMed
Insect health	Bumblebee		Powner	UK (London)	2016	PLoS One	Improving Mitochondrial Function Protects Bumblebees from Neonicotinoid Pesticides.	Bumblebee	LED phototherapy Imidaclopride toxicity	670								"Bees exposed to insecticide and daily to 670nm light showed corrected ATP levels and significantly improved mobility allowing them to feed. Physiological recordings from eyes revealed that light exposure corrected deficits induced by the pesticide. Overall, death rates in bees exposed to insecticide but also given 670nm light were indistinguishable from controls." "Treatment with 670nm on contro…	PubMed
Liver	Minimal hepatic encephalopathy		Arias	Spain	2016	Lasers Med Sci	Low-light-level therapy as a treatment for minimal hepatic encephalopathy: behavioural and brain assessment.	Rat	LED phototherapy Cytochrome oxidase	670	0.05			9	10 cm2	180	7	"Taking these findings into account, an improvement in the PH + LLLT group due to LLLT treatment should show not only a correct acquisition of the behavioural task, indicated by the behavioural differences between PH and PH + LLLT and their absence when compared to the SHAM group, but also a decrease in C.O., due to an improvement in the enzyme activity produced by the LLLT treatment, and similar…	PubMed
Lymphedema			Storz	Germany (Homburg)	2016	Photodermatol Photoimmunol Photomed	Photobiomodulation Therapy in breast cancer-related lymphedema: a randomized placebo-controlled trial.	Human RCT/DB	LED phototherapy LED array (16)	980	640	0.00814	384	4.89	78.54 cm2	600	8	"PBMT using a compactly designed treatment regime in combination with a cluster laser device did not significantly improve quality of life, pain scores, grip strength and limb volume over the time course." "A too high amount of total energy applied per point could be a possible explanation for our results. It’s particularly worth mentioning, that we increased the energy dose in order to cut the t…	PubMed
Muscle	Muscle injury		de Melo	Brazil (São Paulo)	2016	Lasers Med Sci	Light-emitting diode therapy increases collagen deposition during the repair process of skeletal muscle.	Rat	Cryoinjury LED phototherapy	850	30		3.2					"LED therapy at 850 nm induced a significant reduction in inflammation, decreased MMP-2 activity, and increased the amount of immature muscle and collagen fibers during the muscle repair process following acute injury."	PubMed
Muscle	Sports injuries		Foley	USA (Bethlehem, PA)	2016	Laser Ther	830 nm light-emitting diode (led) phototherapy significantly reduced return-to-play in injured university athletes: a pilot study.	Human	HEALITE II device LED phototherapy	830		0.05		60		1200		"Over a 15-month period, a total of 395 injuries including sprains, strains, ligament damage, tendonitis and contusions were treated" "The average LED-mediated RTP in the 65 subjects was significantly shorter at 9.6 days, compared with the mean anticipated RTP of 19.23 days (p = 0.0066, paired two-tailed Student's t-test). "A subjective satisfaction survey was carried out among the 112 students w…	PubMed
Muscle	Exercise		Ferraresi	Brazil (São Carlos)	2016	Am J Phys Med Rehabil	Effects of Light-Emitting Diode Therapy on Muscle Hypertrophy, Gene Expression, Performance, Damage, and Delayed-Onset Muscle Soreness: Case-control Study with a Pair of Identical Twins.	Human RCT Twin study	LED phototherapy Identical twins	850			75			15	36	"Compared with placebo, LEDT increased the maximal load in exercise and reduced fatigue, creatine kinase, and visual analog scale. Gene expression analyses showed decreases in markers of inflammation (interleukin 1β) and muscle atrophy (myostatin) with LEDT. Protein synthesis (mammalian target of rapamycin) and oxidative stress defense (SOD2 [mitochondrial superoxide dismutase]) were up-regulated…	PubMed
Muscle	Exercise		Rossato	Brazil (Florianópolis)	2016	Lasers Med Sci	Effect of pre-exercise phototherapy applied with different cluster probe sizes on elbow flexor muscle fatigue.	Human RCT/DB Crossover	LED phototherapy LED cluster (33 or 9)	670 + 880 + 950								"In both large and small cluster probes (according parameters tested in this study) led to reduced fatigue in elbow flexor muscles, without difference between them."	PubMed
Muscle	Exercise		Fritsch	Brazil (Porto Alegre)	2016	Lasers Med Sci	Effects of low-level laser therapy applied before or after plyometric exercise on muscle damage markers: randomized, double-blind, placebo-controlled trial.	Human RCT/DB	LED phototherapy LED cluster (5)	810	1000		240			210		"In summary, the LLLT protocol used in this study had no effect on strength fall induced by muscle damage; then, caution is needed for recommending phototherapy to reduce this functional impairment. However, LLLT applied both before and after plyometric exercise was able to reduce the muscular echo intensity, indicating a reduced inflammatory response mediated by phototherapy. In addition, our fi…	PubMed
Muscle	Exercise		Vanin	Brazil (São Paulo)	2016	Lasers Med Sci	What is the best moment to apply phototherapy when associated to a strength training program? A randomized, double-blinded, placebo-controlled trial : Phototherapy in association to strength training.	Human RCT/DB	LED phototherapy LED+LLLT cluster	640 + 875 + 905								"Volunteers from group treated with phototherapy before and placebo after training sessions showed significant (p < 0.05) changes in MVC and 1-RM tests for both exercises (leg extension and leg press) when compared to other groups. With an apparent lack of side effects and safety due to no thermal damage to the tissue, we conclude that the application of phototherapy yields enhanced strength gain…	PubMed
Muscle	Exercise		Miranda	Brazil (São Paulo)	2016	J Athl Train	Using Pre-Exercise Photobiomodulation Therapy Combining Super-Pulsed Lasers and Light-Emitting Diodes to Improve Performance in Progressive Cardiopulmonary Exercise Tests.	Human Crossover	LED phototherapy (w/ laser)	640 + 875 + 905								"The combination of lasers and LEDs increased the time, distance, and pulmonary ventilation and decreased the score of dyspnea during a cardiopulmonary test."	PubMed
Nerves	Spinal cord		Hu	Australia (Canberra)	2016	J Neuroinflammation	Red LED photobiomodulation reduces pain hypersensitivity and improves sensorimotor function following mild T10 hemicontusion spinal cord injury.	Rat	LED phototherapy Microglia	670		0.35		63	75 mm2	1800		"We demonstrate that red light penetrates through the entire rat spinal cord and significantly reduces signs of hypersensitivity following a mild T10 hemicontusion spinal cord injury. This is accompanied with improved dorsal column pathway functional integrity and locomotor recovery. The functional improvements were preceded by a significant reduction of dying (TUNEL(+)) cells and activated micro…	PubMed
Oral	Periodontium (in vitro)		Roncati	Italy (Bologna)	2016	J Biol Regul Homeost Agents	Evaluation of light-emitting diode (LED-835 NM) application over human gingival fibroblast: an in vitro study.	In vitro	Elastin gene (ELN) LED phototherapy	835								"In summary, the result of the present study shows that LED irradiation promoted ELN gene expression more in elderly than in younger adults."	PubMed
Oral	Periodontium		Tao	Taiwan (Taipei)	2016	Lasers Med Sci	Evaluation of 660 nm LED light irradiation on the strategies for treating experimental periodontal intrabony defects.	Rat	LED phototherapy	660	40(?)	0.0035		10			28?	"With LED light irradiation, the extent of wound dehiscence was reduced, wound closure was accelerated, epithelial downgrowth was prevented, inflammation was reduced, and periodontal reattachment was promoted in all treatment strategies. Significant reduction of inflammation with LED light irradiation was noted at 1 week in the groups BG and MG (p < 0.05). Osteogenesis was significantly promoted …	PubMed
Oral	Oral mucositis		Campos	Brazil (São Paulo)	2016	J Biophotonics	Comparative study among three different phototherapy protocols to treat chemotherapy-induced oral mucositis in hamsters.	Hamster	LED phototherapy LLLT vs LED Wavelengths	635 808 660			1.2 10 12					"After statistical analysis, the authors' results showed LED and LLLT therapies were efficient treatments for OM, decreasing TNF-α concentration on day 7 (p < 0.05) and completely healing the mucosa on day 10. HPL showed no interference in final healing of OM. According to the methodology used and the results obtained in the present study, LLLT and LED therapies were the best choices to decrease …	PubMed
Oral	Oral mucosal necrosis		Epstein	USA (Los Angeles, CA)	2016	Support Care Cancer	Photobiomodulation therapy: management of mucosal necrosis of the oropharynx in previously treated head and neck cancer patients.	Human Case series	LLLT intraoral + LED phototherapy extraorally LED cluster (69)	660 (IO) + 660& 850 (EO)	75 1400	0.03 0.05	4.5 /point 84	1.8 3	2.5 cm2 28 cm2	60 /point 60		"We report three cases of symptomatic persisting oral ulcerations where the addition of photobiomodulation therapy resulted in a rapid resolution of the oral lesions and in patient symptoms."	PubMed
Oral	Oral mucositis		Treister	USA (Boston, MA)	2016	Photomed Laser Surg	A Feasibility Study Evaluating Extraoral Photobiomodulation Therapy for Prevention of Mucositis in Pediatric Hematopoietic Cell Transplantation.	Human	THOR Model LX2M LED phototherapy LED cluster (69) Extraoral Pediatric patients	660 + 850	340 + 1050	0.05		3				"The 10 trained nurses all reported that the device was accessible, maneuverable, and lightweight, and that training was effective. There was no reported toxicity attributed to the PBT."	PubMed
Pain	Hyperalgesia		Martins	Brazil (Palhoça)	2016	Neuroscience	Light-emitting diode therapy reduces persistent inflammatory pain: Role of interleukin 10 and antioxidant enzymes.	Mouse	Chronic inflammatory hyperalgesia induced by Complete Freund's Adjuvant (CFA) LED phototherapy Dose response	950		0.08		1 2 4	1 cm2 (area)	13 25 50		"LEDT inhibited mechanical and thermal hyperalgesia induced by CFA injection. LEDT did not reduce paw edema, neither influenced the levels of TNF-α and IL1-β; although it increased the levels of IL-10. LEDT significantly prevented TBARS increase in both acute and chronic phases post-CFA injection; whereas protein carbonyl levels were reduced only in the acute phase. LEDT induced an increase in bo…	PubMed
Skin	Flap		Park	Korea (Cheonan)	2016	Cells Tissues Organs	Angiogenic Synergistic Effect of Adipose-Derived Stromal Cell Spheroids with Low-Level Light Therapy in a Model of Acute Skin Flap Ischemia.	Mouse	Adipose-derived stem cells treatment LLLT + stem cells LED phototherapy	660		0.050		30		600	14	"Compared with the spheroid group, skin flap healing was enhanced in the spheroid + LLLT group, including the neovascularization and regeneration of skin appendages. The survival of hASCs was enhanced by decreased apoptosis of hASCs in the skin flaps of the spheroid + LLLT group. The secretion of growth factors was stimulated in the spheroid + LLLT group compared with the ASC and spheroid groups.…	PubMed
Skin	Aging		Calderhead & Vasily	Korea & USA	2016	Clin Plast Surg	Low Level Light Therapy with Light-Emitting Diodes for the Aging Face.	Review	LED phototherapy									Comment: This paper contains two useful pictures of absorption spectra of light (penetration) in the 400-10000 nm wavelength range.	ScienceDirect
Skin	Fibrosis		Ho	USA (Mather, CA)	2016	Trials	A single-blind, dose escalation, phase I study of high-fluence light-emitting diode-red light (LED-RL) on human skin: study protocol for a randomized controlled trial.	Study protocol	LED phototherapy	633				160- 640				"This study may provide important safety information on the effects of high-fluence LED-RL phototherapy on human skin and help facilitate future phase II studies to evaluate the efficacy of high-fluence LED-RL as a potential noninvasive, safe, portable, at-home therapy for treatment of skin fibrosis."	PubMed
Skin	Scars		Park	Korea (Suwon)	2016	Dermatol Surg	Prevention of Thyroidectomy Scars in Asian Adults With Low-Level Light Therapy.	Human	LED phototherapy	590 + 830				60		660	14	"The average VSS and GAS scores were lower in the treatment group, whereas the subjective score was not significantly different."	PubMed
Skin	Atopic dermatitis		Kim	Korea (Goyang)	2016	Photodermatol Photoimmunol Photomed	Effects of low-dose light-emitting-diode therapy in combination with water bath for atopic dermatitis in NC/Nga mice.	Mouse	LED phototherapy Dermatophagoides farina (Df)-induced dermatitis in NC/Nga mice Dose response (!)	850				10 15 20 40 80				"Combined therapy with low-dose LED therapy and water bath therapy significantly ameliorated the development of AD-like skin lesions. These effects were correlated with the suppression of total IgE, NO, histamine, and Th2-mediated immune responses. Furthermore, combination therapy significantly reduced the infiltration of inflammatory cells and the induction of thymic stromal lymphopoietin (TSLP)…	PubMed
Skin	Acne vulgaris		Lee	Korea (Daegu)	2016	Ann Dermatol	Efficacy of Red or Infrared Light-Emitting Diodes in a Mouse Model of Propionibacterium acnes-Induced Inflammation.	Mouse	LLLT vs LED										PubMed
Skin	Cell protection		Mamalis	USA (Sacramento, CA)	2016	J Biophotonics	High fluence light emitting diode-generated red light modulates characteristics associated with skin fibrosis.	In vitro	Skin fibrosis LED phototherapy	633		0.087						"We demonstrate that HF-LED-RL is capable of inhibiting the unifying cellular processes involved in skin fibrosis including proliferation, migration, and collagen production in vitro. These findings suggest that HF-LED-RL may represent a paradigm shifting approach to altering HDF function for treatment of skin fibrosis."
Spinal column	Spinal disk herniation		de Carvalho	Brazil (São José dos Campos)	2016	Lasers Med Sci	Low intensity laser and LED therapies associated with lateral decubitus position and flexion exercises of the lower limbs in patients with lumbar disk herniation: clinical randomized trial.	Human RCT/SB (?)	LED phototherapy LED vs LLLT	904 (laser) 945 (LED)	38 100	0.238 0.100	80 80 (20p)	0.23 0.1	0.16 1 cm2	2080 800	15 15	"We can conclude that in the treatment of L4-L5 and L5-S1 LDH with radiculopathy, LED, associated with lateral decubitus position and flexion exercises of the lower limbs, showed better therapeutic performance for radicular pain, gait claudication, and functional disability." Comment: In this study, LLLT fared as well as placebo (still a great improvement), but LED seemed to lead to better result…	PubMed
Stem cells & regeneration	Epithelial colony forming units		Khan & Arany	USA (Bethesda, MD)	2016	Photomed Laser Surg	Photobiomodulation Therapy Promotes Expansion of Epithelial Colony Forming Units.	In vitro	Laser vs LED LED phototherapy	810								"This study noted a dose-dependent effect of 810 nm laser on increasing eCFUs, either in terms of size or numbers. Comparisons of different wavelengths and light sources noted better efficacy of collimated and coherent lasers compared to LEDs and broad-band light." "PBM therapy promotes expansion of eCFUs that represent progenitors and stem cell populations capable of contributing to tissue repai…	PubMed
Stem cells & regeneration	Osteogenesis		Yang	China (Shenzhen)	2016	Sci Rep	Effects of light-emitting diode irradiation on the osteogenesis of human umbilical cord mesenchymal stem cells in vitro.	In vitro	LED phototherapy	620				2				"In conclusion, low levels of LED light at a wavelength of 620 nm enhance the proliferation and osteogenic differentiation of hUMSCs during a long culture period."	PubMed
Tendons	Achilles tendon		Helrigle	Brazil (São Paulo)	2016	Lasers Med Sci	Effects of low-intensity non-coherent light therapy on the inflammatory process in the calcaneal tendon of ovariectomized rats.	Rat	LED phototherapy	945	32		3.84	0.032 (?)	1 cm2	120 /p (3p)		"It was concluded that low-intensity LED treatment using the parameters and wavelength of 945 nm in the time periods studied reduced the release of IL-6 and TNF-α and increased the release of IL-10, thereby improving the inflammatory response in OVX rats."	PubMed
Voice	Vocal fatigue		Kagan & Heaton	USA (Boston, MA)	2016	J Voice	The Effectiveness of Low-Level Light Therapy in Attenuating Vocal Fatigue.	Human	LED phototherapy LED array	628 828		0.07 0.055				1200		"Red light significantly normalized the combination of PTP, IPSV, and RFF measures compared to other conditions." "The red setting heats the neck surface to approximately 43.3°C, whereas the IR setting heats the neck surface to 35.5°C based on a thermometer" "Results indicate that red light may be effective in improving acoustic, aerodynamic, and self-perceptual markers of vocal fatigue. Although…	PubMed
Wound healing	Wounds		Mao	USA (Boston, MA)	2016	Sci Rep	Additive enhancement of wound healing in diabetic mice by low level light and topical CoQ10.	Mouse	Diabetic mice LLLT + topical CoQ10 LED phototherapy ATP	830		0.014		2017-02-04	1 cm2	300		"LLLT followed by topical CoQ10 enhanced wound healing by 68~103% in diabetic mice in the first week and more than 24% in the second week compared with untreated controls. All wounds were fully healed in two weeks following the dual treatment, in contrast to only 50% wounds or a fewer being fully healed for single or sham treatment." "The accelerated healing was corroborated by at least 50% highe…	PubMed
Wound healing	Mechanisms		Huang	China (Shanghai)	2016	Photomed Laser Surg	Light-Emitting Diode Irradiation (640 nm) Regulates Keratinocyte Migration and Cytoskeletal Reorganization Via Hypoxia-Inducible Factor-1α.	In vitro	Keratinocyte LED phototherapy	640				12 24				"LED irradiation may increase keratinocyte migration via HIF-1α-dependent cytoskeletal reorganization."	PubMed
Wound healing	Incisions		Figurová	Slovakia (Košice)	2016	Photomed Laser Surg	Histological Assessment of a Combined Low-Level Laser/Light-Emitting Diode Therapy (685 nm/470 nm) for Sutured Skin Incisions in a Porcine Model: A Short Report.	Pig (minipig)	LED array (4 red + 13 blue) LED phototherapy	685 + 470	200 + 208		84	3.36		420	7	"Combined red and blue PBM accelerated the process of re-epithelization and formation of cross-linked collagen fibers compared with sham irradiated control wounds." "Our results demonstrate that the current dose of combined red and blue PBM improves the healing of sutured skin incisions in minipigs."	PubMed
Wound healing	Wounds		Li	China (Beijing)	2016	PLoS One	The Histopathological Investigation of Red and Blue Light Emitting Diode on Treating Skin Wounds in Japanese Big-Ear White Rabbit.	Rabbit	LED phototherapy	630		0.050		45 90	300 cm2	900 1800		"On days 16 and 17 of irradiation, the healing rates in red (15 min and 30 min) and blue (15 min and 30 min) groups were 50%, 37.5%, 25% and 37.5%, respectively, while the healing rate in the control group was 12.5%. The percentage healed area in the red light groups was significantly higher than those in other groups. Collagen fiber and skin thickness were significantly increased in both red lig…	PubMed
Wound healing	Wounds		Gomes	Brazil (Londrina)	2016	Lasers Med Sci	Effects of the led therapy on the global DNA methylation and the expression of Dnmt1 and Dnmt3a genes in a rat model of skin wound healing.	Rat	LED phototherapy	604				0.8 1.6				"Based on our findings, we propose that DNA methylation is an important molecular mechanism associated to wound healing and that irradiation with 1.6 J/cm(2) of LED evokes an increase in the expression of the Dnmt3a that might associates to the efficiency of the epithelial wound healing."	PubMed
Wound healing	Surgical wounds		Lima	Brazil (São Paulo)	2016	Photomed Laser Surg	Low-Level Laser and Light-Emitting Diode Therapy for Pain Control in Hyperglycemic and Normoglycemic Patients Who Underwent Coronary Bypass Surgery with Internal Mammary Artery Grafts: A Randomized, Double-Blind Study with Follow-Up.	Human RCT/DB	LLLT vs LED LED phototherapy	640 (laser) 660 (LED)				1.06 0.24				"LLLT and LED had similar analgesic effects in hyperglycemic and normoglycemic patients, better than placebo and control groups."	PubMed
Wound healing	Burns		Silveira	Brazil (Criciúma)	2016	Inflammation	Effect of Low-Power Laser (LPL) and Light-Emitting Diode (LED) on Inflammatory Response in Burn Wound Healing.	Rat	Wavelength comparison LLLT vs LED LED phototherapy	632 (LED) 660 (laser) 850 (LED) 904 (laser)								"Taken together, these results suggest that LPL 660 nm and LED 850 nm appear reduced in the inflammatory response and oxidative stress parameters, thus decreasing dermal necrosis and increasing granulation tissue formation, in fact accelerating the repair of burn wounds."	PubMed
Bone	Bone repair		Havlucu	Turkey (Istanbul)	2015	J Oral Implantol	Effects of Light-Emitting Diode Photobiomodulation Therapy and BioOss as Single and Combined Treatment in an Experimental Model of Bone Defect Healing in Rats.	Rat	LED phototherapy	618	-	0.02	-	24	-	1200	4 7 11	"Within the limitations of this study, LPT has positive effects on bone healing histopathologically and histomorphometrically for the defects filled with BioOss 3 weeks after the rats' femora injury." Comment: Parameters were poorly reported. For example, spot size was not reported.	PubMed
Bone	Bone repair		Soares	Brazil (Salvador, Bahia)	2015	Braz Dent J	Repair of surgical bone defects grafted with hydroxylapatite + β-TCP and irradiated with λ=850 nm LED light.	Rat	Surgical bone defect LED phototherapy Bone graft (HA + β-TCP)	850	150	-	-	20	0.5 cm2	-	7	"It may be concluded that the use of LED phototherapy was effective in positively modulating the process of bone repair of bone defects in the femur of rats submitted or not to biomaterial grafting." Comment: Treatment parameters were poorly reported. Radiant energy, power density and treatment duration were missing.	PubMed
Brain	Parkinson's disease		Reinhart	France & Australia	2015	Neurosci Res	810nm near-infrared light offers neuroprotection and improves locomotor activity in MPTP-treated mice.	Mouse	MPTP LED phototherapy	810			0.057				4	"Our results showed that MPTP-treated mice that were irradiated with 810nm NIr had both greater locomotor activity (∼40%) and number of dopaminergic cells (∼20%) than those that were not. In summary, 810nm (as with 670nm) NIr offered neuroprotection and improved locomotor activity in MPTP-treated mice."	PubMed
Cells	Scratch wound model		Teuschl	Austria (Vienna)	2015	Dermatol Surg	Phototherapy with LED light modulates healing processes in an in vitro scratch-wound model using 3 different cell types.	In vitro	LED phototherapy	470 630						600	5	"[R]ed light did not alter apoptosis in either cell type but promoted proliferation in all 3 cell types with significant effects in C2C12 and NIH/3T3 cells and shortened time to closure in all 3 cell types."	PubMed
Cells	Protection		Spitler	USA (Irvine, CA)	2015	J Biomed Opt	Combination of low level light therapy and nitrosyl-cobinamide accelerates wound healing.	In vitro	U2OS human osteosarcoma cells Mechanisms ATP production Oxygen consumption LED phototherapy	652 806 laser 637 901 LED						1800		"LLLT-enhanced wound healing proceeded through an electron transport chain-C-ox-dependent mechanism with a reduction of reactive oxygen species and increased adenosine triphosphate production. C-ox was validated as the primary photoacceptor by three observations: increased oxygen consumption, reduced wound healing in the presence of sodium azide, and disassociation of cyanide, a known C-ox ligand…	PubMed
Circulation	Hindlimb ischemia		Park	Korea (Cheonan)	2015	Lasers Med Sci	Vascular regeneration effect of adipose-derived stem cells with light-emitting diode phototherapy in ischemic tissue.	Mouse	Adipose-derived stem cells treatment LLLT + stem cells LED phototherapy	660		0.050		30				"In the ASC + LLLT group, the survival of ASCs was increased due to the decreased apoptosis of ASCs. The secretion of growth factors was stimulated in this group compared with ASCs alone. The ASC + LLLT group displayed improved treatment efficacy including neovascularization and tissue regeneration compared with ASCs alone. In particular, quantitative analysis of laser Doppler blood perfusion ima…	PubMed
Circulation	Brain		Salgado	Brazil (São Paulo)	2015	Lasers Med Sci	The effects of transcranial LED therapy (TCLT) on cerebral blood flow in the elderly women.	Human	Cerebral blood flow LED phototherapy	627		0.07		10		120	8	"Paired t-test results showed that there was a significant improvement after TCLT with increase in the systolic and diastolic velocity of the left middle cerebral artery (25 and 30%, respectively) and basilar artery (up to 17 and 25%), as well as a decrease in the pulsatility index and resistance index values of the three cerebral arteries analyzed (p < 0.05). TCD parameters showed improvement in…	PubMed
Eyes	In vitro		Fuma	Japan	2015	Mol Vis	Photobiomodulation with 670 nm light increased phagocytosis in human retinal pigment epithelial cells.	In vitro (human)	LED phototherapy									"Photobiomodulation reduced ROS production but did not affect cell viability or mitochondrial membrane potential."	PubMed
Eyes	Age-related macular degeneration		Calaza	UK (London)	2015	Neurobiol Aging	Mitochondrial decline precedes phenotype development in the complement factor H mouse model of retinal degeneration but can be corrected by near infrared light.	Mouse	LED phototherapy Age-related macular degeneration (complement factor H deficiency)	670		0.04				90	5	"Near infrared (NIR) increases ATP and reduces inflammation. [...] In summary, we provide evidence for a mitochondrial basis for this disease in mice and correct this with simple light exposure known to improve mitochondrial function."	PubMed
Eyes	Diabetic retinopathy		Saliba	USA (Ohio & Michigan)	2015	PLoS One	Photobiomodulation Mitigates Diabetes-Induced Retinopathy by Direct and Indirect Mechanisms: Evidence from Intervention Studies in Pigmented Mice.	Mouse	LED phototherapy Diabetic eye	670		0.0203		4.86		240	70	670nm light protected against retinopathy (in streptozotocin-induced diabetes).	PubMed
Fertility, genitals, etc.	Sperm		Ban Frangez	Slovenia (Ljubljana)	2015	Lasers Med Sci	Photobiomodulation with light-emitting diodes improves sperm motility in men with asthenozoospermia.	In vitro	Human sperm LED phototherapy	850 625 + 660 + 850 470 625 + 660 + 470								"This finding confirmed that photobiomodulation using LED improved the sperm motility in asthenozoospermia regardless of the wavelength." Comment: Interesting result, since blue light was effective too.	PubMed
Insect health	Fruit fly		Begum	UK (London)	2015	Biol Lett	Near-infrared light increases ATP, extends lifespan and improves mobility in aged Drosophila melanogaster.	Fruit fly	LED phototherapy	670								"Here, we expose fruitflies daily to 670 nm radiation, revealing elevated ATP and reduced inflammation with age. Critically, there was a significant increase in average lifespan: 100-175% more flies survived into old age following 670 nm exposure and these had significantly improved mobility."	PubMed
Muscle	Exercise		Francisco Cde	Brazil (São Carlos)	2015	Trials	Evaluation of acute effect of light-emitting diode (LED) phototherapy on muscle deoxygenation and pulmonary oxygen uptake kinetics in patients with diabetes mellitus: study protocol for a randomized controlled trial.	Study protocol	Diabetic patients LED phototherapy									"The main objective of this study is to evaluate the acute effects of muscular pre-conditioning using LED phototherapy on pulmonary oxygen uptake, muscle oxygenation, heart rate, and arterial pressure dynamics during dynamic moderate exercise. We hypothesize that phototherapy may be beneficial to optimize aerobic fitness in the DM population."	PubMed
Muscle	Muscle injury		Takhtfooladi	Iran (Tehran)	2015	Lasers Med Sci	Effects of light-emitting diode (LED) therapy on skeletal muscle ischemia reperfusion in rats.	Rat	LED phototherapy	904				4			2?	"The extent of muscle damage in the IR + LED group was significantly lower than that in the IR group (P < 0.05). In comparison with other groups, tissue malondialdehyde (MDA) levels in the IR group were significantly increased (P < 0.05). The muscle tissue glutathione (GSH), superoxide dismutases (SOD), and catalase (CAT) levels in the IR group were significantly lower than those in the subjects …	PubMed
Muscle	Exercise		Ferraresi	Brazil (São Carlos)	2015	Lasers Med Sci	Light-emitting diode therapy (LEDT) before matches prevents increase in creatine kinase with a light dose response in volleyball players.	Human RCT/DB	LED phototherapy LED cluster	630 + 850								"LEDT prevented significant increases of CK in blood in athletes when applied before official matches with a light dose response of 210-315 J, suggesting athletes might consider applying LEDT before competition." Nampo et al published a brief criticism of this paper: "Due to the fragilities we pointed above, we agreed that the validity of this paper does not allow safe conclusions. To produce val…	PubMed
Muscle	Exercise		Ferraresi	Brazil (São Carlos)	2015	Physiother Theory Pract	Muscular pre-conditioning using light-emitting diode therapy (LEDT) for high-intensity exercise: a randomized double-blind placebo-controlled trial with a single elite runner.	Human (n=1)	LED phototherapy LED cluster	850	50		37.5			15		"LEDT improved the speed of the muscular VO2 adaptation (∼-9 s), decreased O2 deficit (∼-10 L), increased the VO2 from the slow component phase (∼+348 ml min(-1)), and increased the time limit of exercise (∼+589 s)." Note: A photograph is supplied, but it is black-and-white.	PubMed
Muscle	Exercise		Ferraresi	Brazil (São Carlos)	2015	Lasers Med Sci	Time response of increases in ATP and muscle resistance to fatigue after low-level laser (light) therapy (LLLT) in mice.	Mouse	LED phototherapy LED cluster	630 + 850	500 + 1000	0.08 (skin)		7.2	45 cm2 cluster	90		"LEDT-6 h was the subgroup with the highest ATP content in soleus and gastrocnemius compared to all subgroups (P < 0.001). In addition, mice in LEDT-6 h group performed more repetitions in the fatigue test (P < 0.001) compared to all subgroups: LEDT-sham and LEDT-5 min (~600 %), LEDT-3 h (~200 %), and LEDT-24 h (~300 %). A high correlation between the fatigue test repetitions and the ATP content …	PubMed
Muscle	Exercise		Ferraresi	Brazil (São Paulo)	2015	J Biophotonics	Light-emitting diode therapy in exercise-trained mice increases muscle performance, cytochrome c oxidase activity, ATP and cell proliferation.	Mouse	LED phototherapy LED cluster	630 850		0.08		7.3		90		"Six bi-daily training sessions LEDT-After and LEDT-Before-After regimens more than doubled muscle performance and increased ATP more than tenfold. The effectiveness of LEDT on improving muscle performance and recovery suggest applicability for high performance sports and in training programs." Star: Parameters are well reported. Results are interesting. A photograph is supplied.	PubMed
Nerves	In vitro		Burland	France (Montpellier)	2015	J Biophotonics	Neurite growth acceleration of adult Dorsal Root Ganglion neurons illuminated by low-level Light Emitting Diode light at 645 nm.	In vitro	LED phototherapy	645								"Although the axotomized neurons were naturally already in a rapid regeneration process, an enhancement was found to occur while irradiating with the LED light, which may be promising for therapy applications."	PubMed
Nerves	PNS		Takhtfooladi & Sharifi	Iran	2015	Lasers Med Sci	A comparative study of red and blue light-emitting diodes and low-level laser in regeneration of the transected sciatic nerve after an end to end neurorrhaphy in rabbits.	Rabbit	Nerve injury LLLT vs LED	680 650 450	10			10 2.4 2.4	4 mm2 1.5 cm2 1.5 cm2	600 600 600	14 14 14	In LLLT group (680nm), increase in Schwann cells, large myelinic axons and neurons was noted, compared to other groups. Red LED (650nm) treatment wasn't beneficial in this study.	PubMed
Oral	Oral surgery		Wang	Taiwan (Taipei)	2015	J Periodontol	Light-emitting diode irradiation promotes donor site wound healing of the free gingival graft.	Rat (+ in vitro)	LED phototherapy	660				10 20				"LED light irradiation at 660 nm accelerated palatal wound healing, potentially via reducing reactive oxygen species production, facilitating angiogenesis, and promoting provisional matrix and wound reorganization."	PubMed
Oral	Periodontium		Chang	Taiwan (Taipei)	2015	Lasers Med Sci	Controlling periodontal bone levels with multiple LED irradiations.	Rat	LED phototherapy	660		0.014		10			1 2-3 /wk	"By day 7, PBL was significantly reduced (p < 0.05), with significantly reduced inflammation (p < 0.05) and gingival hyperplasia (p < 0.001), in the animals receiving three irradiations per week. At day 14, the reduction in gingival hyperplasia was still significant (p < 0.05), and collagen matrix deposition and realignment appeared to be accelerated in the animals receiving three irradiations pe…	PubMed
Oral	Endodontics		de Carvalho	Brazil (Salvador, Bahia)	2015	Lasers Med Sci	Effect of laser (λ 660 nm) and LED (λ 630 nm) photobiomodulation on formocresol-induced oral ulcers: a clinical and histological study on rodents.	Rat	LED phototherapy LLLT vs LED	630 (LED) 660 (laser)	150 40			4.8 4.8	0.8 cm2 4 mm2			"At the end of the experimental period (11 days), there was no difference regarding to the size of the ulcers between the laser and LED groups, although there was a difference between the treated and untreated groups (p=0.0019)." Comment: The difference between LLLT and LED groups, compared to the control group at the end of the study, are huge.	PubMed
Oral	TMJ		de Castro	Brazil (Salvador, Bahia)	2015	Lasers Med Sci	Assessment of different energy delivery settings in laser and LED phototherapies in the inflammatory process of rat's TMJ induced by carrageenan.	Rat	LED phototherapy LLLT vs LED	780 (laser) 850 (LED)	70 100		10 10					"Over the time course of the study in the laser group, the region of the condyle presented mild chronic inflammation and intense vascularization. In the LED group, the condyle showed aspects of normality and absence of inflammation in some specimens. In all the time points, the laser-irradiated groups showed greater amount of collagen deposition in the condyle (p = 0.04) and in the disc (p = 0.03…	PubMed
Oral	TMJ		Panhoca	Brazil (São Carlos)	2015	Lasers Med Sci	Comparative clinical study of light analgesic effect on temporomandibular disorder (TMD) using red and infrared led therapy.	Human Comparison trial	LED phototherapy LLLT vs LED	630 LED 780 laser 850 LED	150 70 150	0.300 1.7 0.300	9 /p 4.2 /p 9 /p (5p)	18 105 18		60 /p 60 /p 60 /p (5p)	8 8 8	"There was an increase in tissue temperature during both the red and the infrared LED irradiation in ex vivo. There was a significant reduction of pain and increase of the maximum oral aperture for all groups (p ≥ 0.05). There was no significant difference in pain scores and maximum oral aperture between groups at baseline or any periods after treatment (p ≥ 0.05). The current study showed that r…	PubMed
Oral	Orthodontics		El-Bialy	Canada (Edmonton)	2015	Angle Orthod	The effect of light-emitting diode and laser on mandibular growth in rats.	Rat	LLLT vs LEDT LED phototherapy	655		0.01		6				"Average pain scores sensed in all 4 intervals on control and laser sides were 4.06 ± 2.85 and 2.35 ± 1.77, respectively (t-test P < 0.0001)." "The LED-treated groups showed more mandibular growth stimulation compared with the laser groups."	PubMed
Oral	Orthodontics		Ekizer	Turkey (Kayseri)	2015	Lasers Med Sci	Effect of LED-mediated-photobiomodulation therapy on orthodontic tooth movement and root resorption in rats.	Rat	Root resorption LED phototherapy	618	0.02					1200	10 (?)	"The magnitude of movement in the treatment group was higher (1.55 ± 0.33 mm) compared to the control group (1.06 ± 0.35 mm). Histomorphometric analysis of root resorption, expressed as a percentage, showed that the average relative root resorption affecting the maxillary molars on the TM side was 0.098 ± 0.066 in the LPT group and 0.494 ± 0.224 in the control group."	PubMed
Skin	Acne vulgaris		Jung	Korea (Daejeon)	2015	Arch Dermatol Res	Regulation of lipid production by light-emitting diodes in human sebocytes.	In vitro	LED phototherapy	415 630								"When applied to human primary sebocytes, 415 nm blue light suppressed cell proliferation. Based on a lipogenesis study using Oil Red O, Nile red staining, and thin-layered chromatography, 630 nm red light strongly downregulated lipid production in sebocytes. These results suggest that 415 nm blue light and 630 nm red light influence lipid production in human sebocytes and have beneficial effects…	PubMed
Skin	Flap		Park	Korea (Cheonan)	2015	Cytotherapy	Prevention of skin flap necrosis by use of adipose-derived stromal cells with light-emitting diode phototherapy.	Mouse	LED phototherapy	660		0.050		30		600	20	These data suggest that LLLT is an effective biostimulator of ASCs in vascular regeneration, which enhances the survival of ASCs and stimulates the secretion of growth factors in skin flaps.	PubMed
Skin	Ultraviolet (damage and erythema)		Myakishev-Rempel	USA (Chicago, IL)	2015	Photomed Laser Surg	Red Light Modulates Ultraviolet-Induced Gene Expression in the Epidermis of Hairless Mice.	Mouse	LED phototherapy	670		0.008		2.5		312	3	"This is an initial observation that in mouse red light LLLT more often than not causes opposite gene expression changes or reduces those caused by moderate UVA-UVB irradiation."	PubMed
Skin			Opel	USA (Maywood, IL)	2015	J Clin Aesthet Dermatol	Light-emitting Diodes: A Brief Review and Clinical Experience.	Review + case series	LED phototherapy	"The authors’ clinical experience with a specific yellow light-emitting diode device was mixed, depending on the condition being treated, and was likely influenced by the device parameters."									PubMed
Skin			Calderhead	Korea	2015	Laser Ther	Adjunctive 830 nm light-emitting diode therapy can improve the results following aesthetic procedures.	Review	LED phototherapy	"A growing body of clinical evidence is showing that applying 830 nm LED-LLLT as soon as possible post-procedure, both invasive and noninvasive, successfully hastens the resolution of sequelae associated with patient downtime in addition to significantly speeding up frank wound healing."									PubMed
Stem cells & regeneration	Wound healing		Park	Korea (Cheonan)	2015	PLoS One	Enhancement of Ischemic Wound Healing by Spheroid Grafting of Human Adipose-Derived Stem Cells Treated with Low-Level Light Irradiation.	Mouse (+ in vitro)	LED phototherapy	660		0.05		30	d = 8 mm	600	20	"These findings suggest that transplantation of an ASC spheroid treated with low-level light may be an effective form of stem cell therapy for treatment of a wound bed."	PubMed
Tendons	Digital flexor tendons		de Mattos	Brazil (Botucatu)	2015	Lasers Med Sci	Effect of phototherapy with light-emitting diodes (890 nm) on tendon repair: an experimental model in sheep.	Sheep	LED phototherapy	890								"The absence of lameness and a significant improvement (p < 0.05) in the sensitivity to pain during palpation were observed in the treated group. Furthermore, a significant reduction in oedema and an increased number of vessels (p < 0.05) were observed in this group with the B-mode and power Doppler US, respectively. No significant difference in the evolution of the lesion was found. There was a …	PubMed
Tendons	Achilles tendon		Moura Júnior Mde	Brazil (Teresina)	2015	Lasers Med Sci	Assessing the biochemical changes of tendons of rats in an experimental model of tenotomy under therapeutic ultrasound and LEDs (625 and 945 nm) by near-infrared Raman spectroscopy.	Rat	Tenotomy LED phototherapy	625 945				4 4				"LED therapy at 625 nm showed an increase in collagen synthesis, contributing to the process of tendon healing."	PubMed
Wound healing	Wounds		Wu	USA (Bethesda, MD)	2015	Wound Repair Regen	Organic light emitting diode improves diabetic cutaneous wound healing in rats.	Rat + in vitro	In vitro: hyperglycemic diabetic cell culture LED vs LLLT LED phototherapy	623 (broad band) 635		0.007 0.010 0.010		0.2 1.0 5.0 5.0				In vitro: ↑total ATP concentration ↑metabolic activity (MTS assay) ↑cell proliferation (CyQuant assay) In vivo: ↑wound closure ↑histological score ↑fibroblast growth factor-2 expression	PubMed
Wound healing	Venous ulcer		Siqueira	Brazil (Londrina)	2015	Lasers Med Sci	Effects of weekly LED therapy at 625 nm on the treatment of chronic lower ulcers.	Human SB	LED phototherapy	625				4				"The results suggest that LED therapy improved the effectiveness of the Unna's boot since no refractory ulcer was observed in the LED group after 19 weeks. However, LED therapy did not alter the local secretion of TNF-α nor accelerate wound healing."	PubMed
Wound healing	Wounds		Park	Korea (Chungnam)	2015	Biochem Biophys Res Commun	Adipose-derived stromal cell cluster with light therapy enhance angiogenesis and skin wound healing in mice.	Mouse	LED phototherapy Human adipose-derived mesenchymal stem cells (hASCs)	660		0.05		30				"The cluster + LLLT group enhanced the wound healing, including neovascularization and regeneration of skin appendages, compared with the cluster group. The secretion of growth factors was stimulated in the cluster + LLLT group compared with the ASCs and cluster group. These data suggest that LLLT is an effective biostimulator of cluster hASCs in wound healing that enhances the survival of hASCs …	PubMed
Wound healing	Wounds		Kerppers	Brazil (Guarapuava)	2015	Lasers Med Sci	Effect of light-emitting diode (ʎ 627 nm and 945 nm ʎ) treatment on first intention healing: immunohistochemical analysis.	Rat	LED phototherapy Wavelength comparison	627 945								"The histologic analysis with tissue samples stained with picrosirius red showed a statistical difference between the positive controls, LED 627 and LED 945 nm groups; the group treated with LED 627 nm showed a predominance of mature collagen. The immunohistochemical analysis showed a statistically significant high concentration of collagen I in the LED 945 nm group. The irradiation of wounds wit…	PubMed
Bone	Osteoclastogenesis		Lim	Korea (Cheonan)	2014	Lasers Med Sci	A 635-nm light-emitting diode (LED) therapy inhibits bone resorptive osteoclast formation by regulating the actin cytoskeleton.	In vitro	LED phototherapy	635								"In a morphological analysis, the formation of ROC was significantly inhibited by 635-nm LED irradiation in the different cell types. Actin rings were seen at cell peripheries in most ROC cells of the control group, but patches containing disorganized actin were found in the irradiation group. Both the number of ROCs and bone resorption activity were much lower in the irradiation group than in th…	PubMed
Bone	Osteoblasts		Asai	Japan (Kobe)	2014	Kobe J Med Sci	The long-term effects of red light-emitting diode irradiation on the proliferation and differentiation of osteoblast-like MC3T3-E1 cells.	In vitro	LED phototherapy Dose response	630				0.5 1.5 3.0				"The number of viable MC3T3-E1 cells showed a tendency to increase after the irradiation at all three energy densities in comparison with a non-irradiation group (control group). In particular, there was a remarkable 3.34-fold increase in the group irradiated with 3.0J/cm² on day 7 after starting the culture. On culture day 15, there was a tendency for the red LED irradiation group (0.5 J/cm²) to…	PubMed
Bone	Bone repair		Soares	Brazil (Salvador, Bahia)	2014	Lasers Med Sci	Do laser/LED phototherapies influence the outcome of the repair of surgical bone defects grafted with biphasic synthetic microgranular HA + β-tricalcium phosphate? A Raman spectroscopy study.	Rat	LED phototherapy LLLT vs LED	780 (laser) 850 (LED)	70 150	-	-	5 5 (on 4 points)	0.4 cm2 0.5 cm2	-	7 7	"Raman intensities of both mineral and matrix components indicated that the use of laser and LED phototherapies improved the repair of bone defects grafted or not with biphasic synthetic microgranular HA + β-tricalcium phosphate."	PubMed
Bone	Cell proliferation		Pagin	Brazil (São Paulo)	2014	Lasers Med Sci	Laser and light-emitting diode effects on pre-osteoblast growth and differentiation.	In vitro	LED phototherapy LLLT vs LED	630 (LED) 660 (laser) 780 (laser)								"Cell growth was assessed by a colorimetric test (MTT) (24, 48, 72, and 96 h)" "At 24 h, the cell growth was enhanced 3.6 times by LED (5 J/cm(2)), 6.8 times by red laser (3 J/cm(2)), and 10.1 times by red laser (5 J/cm(2)) in relation to control group (p < 0.05). At the other periods, there was no influence of irradiation on cell growth (p > 0.05). The production of ALP was not influenced by irr…	PubMed
Bone	Bone repair		Pinheiro	Brazil	2014	J Photochem Photobiol B	Raman ratios on the repair of grafted surgical bone defects irradiated or not with laser (λ780 nm) or LED (λ850 nm).	Rat	LLLT vs LED LED phototherapy	780 (laser) 850 (LED)	70 150	-	-	5 20 (???)	0.4 cm2 0.5 cm2	-	7 7	"The results of the present study are well aligned with previous reports from our group [7, 8, 9, 13, 14, 22, 27, 30] and indicate that the association of laser/LED light with HA graft improved the repair of bone defects." Comment: I was unable to interpret the results.	PubMed
Brain	Brain injury		Naeser	USA (Boston, MA)	2014	J Neurotrauma	Significant improvements in cognitive performance post-transcranial, red/near-infrared light-emitting diode treatments in chronic, mild traumatic brain injury: open-protocol study.	Human Open-protocol study	Chronic TBI patients LED phototherapy	633+ 870								"Each LED cluster head had a 5.35 cm diameter (9 red diodes, 633 nm, and 52 NIR diodes, 870 nm were embedded into each LED cluster head); 22.48 cm2 in size; 500 mW total power; 22.2 mW/cm2 power density; continuous wave." "A significant linear trend was observed for the effect of LED treatment over time for the Stroop test for Executive Function, Trial 3 inhibition (p=0.004); Stroop, Trial 4 inhi…	PubMed
Brain	Parkinson's disease		Moro	France & Australia	2014	J Neurosurg	Photobiomodulation inside the brain: a novel method of applying near-infrared light intracranially and its impact on dopaminergic cell survival in MPTP-treated mice.	Mouse	MPTP LED phototherapy Light delivery into the brain via optical fiber	670								"Measurements showed that the NIr intensity declined as distance from the source increased across the brain (65% per mm) but was detectable up to 10 mm away. At neuroprotective (0.16 mW) and much higher (67 mW) intensities, the NIr caused no observable behavioral deficits, nor was there evidence of tissue necrosis at the fiber tip, where radiation was most intense. Finally, the intracranially del…	PubMed
Brain	Parkinson's disease		Johnstone	Australia (Sydney)	2014	Neuroscience	Indirect application of near infrared light induces neuroprotection in a mouse model of parkinsonism – An abscopal neuroprotective effect	Mouse	MPTP Systemic effects LED phototherapy	670		0.05		4		90		"In summary, the findings suggest that treatment of a remote tissue with NIr is sufficient to induce protection of the brain, reminiscent of the ‘abscopal effect’ sometimes observed in radiation treatment of metastatic cancer. This discovery has implications for the clinical translation of light-based therapies, providing an improved mode of delivery over transcranial irradiation."	PubMed
Cells			De Castro	Brazil (Salvador, Bahia)	2014	Lasers Med Sci	Do laser and led phototherapies influence mast cells and myofibroblasts to produce collagen?	In vitro	Mast cells Myofibroblasts LLLT vs LED	660 laser 630 LED								"It is concluded that the mast cell and myofibroblast population might participate in the collagen formation of irradiated wounds particularly in relation to laser phototherapy." "No statistical significances were observed for LED light according to the parameters used in this study."	PubMed
Cells	Protection		Spitler & Berns	USA (Irvine, CA)	2014	J Biomed Opt	Comparison of laser and diode sources for acceleration of in vitro wound healing by low-level light therapy.	In vitro	Wound healing LED phototherapy LED vs LLLT	652 806 (laser) 637 901 (LED)								"The laser and LED sources were found to be comparable when equal doses of light were applied. The biological response measured was similar in most cases."	PubMed
Eyes	Age-related macular degeneration		Gkotsi	UK (London)	2014	Exp Eye Res	Recharging mitochondrial batteries in old eyes. Near infra-red increases ATP.	Mouse	LED phototherapy Age-related macular degeneration	670		0.04				90	7	"When 12 month old mice were exposed to 670 nm for 90 s 7 times spaced over 84 h at an energy level of 40 mW/cm2 there was significant increase in retinal ATP of just under 20% from around 14,000 to 17,000 pm/mg (P < 0.05. Fig. 1B)." "In light of all these factors, it is likely that this treatment will benefit retinal disease. But this need not be confined to the eye, as declining ATP is a featur…	PubMed
Eyes	Diabetic macular edema		Tang	USA (Cleveland, OH)	2014	Br J Ophthalmol	Photobiomodulation in the treatment of patients with non-center-involving diabetic macular oedema.	Human Case series	LED phototherapy Diabetic macular edema	670				25 (?) (closed eye)		160	60+	"Daily PBM treatment for only 80 s per treatment twice daily caused a significant reduction in focal retinal thickening in all 4 treated eyes. No adverse effects attributable to therapy were noted by the patients or study investigators during the study period."	PubMed
Eyes	Light-induced damage		Di Marco	Italy (L'Aquila)	2014	PLoS One	Combining neuroprotectants in a model of retinal degeneration: no additive benefit.	Rat	LED phototherapy Light-induced damage	670				4-4.5				[PBM protected eyes from light-induced retinal damage.]	PubMed
Eyes	Light-induced damage		Ahamed Basha	India (Chennai)	2014	Ann Anat	Protective effect of light emitting diode phototherapy on fluorescent light induced retinal damage in Wistar strain albino rats.	Rat	LED phototherapy Light-induced damage	670		0.025		9		360		"Animals of the FL group showed a significant reduction in the outer nuclear layer thickness and cell count in addition to the total thickness of the retina. LL group which were exposed to 670 nm LED prior to exposure to fluorescent light showed a significant decrease in the degree of damage."	PubMed
Eyes	Light-induced damage		Giacci	Australia (Adelaide & Crawley)	2014	PLoS One	Differential effects of 670 and 830 nm red near infrared irradiation therapy: a comparative study of optic nerve injury, retinal degeneration, traumatic brain and spinal cord injury.	Rat	LED phototherapy Light-induced damage Preconditioning	670 830				3.4 2.7		180	5	670nm (red light) had better effect on retina than 830nm (near-infrared).	PubMed
Heart	MI		Keszler	USA (Milwaukee, WI)	2014	Front Physiol	Far red/near infrared light-induced protection against cardiac ischemia and reperfusion injury remains intact under diabetic conditions and is independent of nitric oxide synthase.	Mouse	Diabetic mice Dose response LED phototherapy LED array	670		0.170				300		"Here we tested the hypothesis that NIR elicits protection in a diabetic mouse model where other cardioprotective interventions such as pre- and postconditioning fail, and that the protection is independent of nitric oxide synthase (NOS). NIR reduced infarct size dose dependently. Importantly, NIR-induced protection was preserved in a diabetic mouse model (db/db) and during acute hyperglycemia, a…	PubMed
Heart	MI		Quirk	USA (Milwaukee, WI)	2014	Photomed Laser Surg	Cardioprotection from ischemia-reperfusion injury by near-infrared light in rats.	Rat	Ischemia-reperfusion LED phototherapy LED cluster	670		0.03 (heart)		18		600		"NIR application had no effect on the function of the nonischemic isolated heart, and had no effect on infarct size when applied during global ischemia. In the in vivo model, NIR commencing immediately before reperfusion decreased infarct size by 40%, 33%, 38%, and 77%, respectively, after regional ischemic periods of 30, 20, 15, and 10 min."	PubMed
Joints	Osteoarthritis		Ammar TA	Egypt (Cairo)	2014	J Lasers Med Sci	Monochromatic Infrared Photo Energy versus Low Level Laser Therapy in Patients with Knee Osteoarthritis.	Human RCT	LLLT vs LED (SLED)	850 (laser) 890 (SLED)								"There were statistically significant improvements in pain intensity and lower extremity functional scale scores (p<0.05) in each group. However, no significant differences were recorded between the groups (p>0.05)."	PubMed
Muscle	Exercise		Borges	Brazil (Jequie)	2014	Lasers Med Sci	Light-emitting diode phototherapy improves muscle recovery after a damaging exercise.		LED phototherapy	630	300			20.4	1.77 cm2	120		"Our results showed that the muscle soreness, muscle strength loss, and ROM impairments were significantly reduced up to 96 h after a damaging eccentric exercise bout for the LEDT group compared with the PLACEBO group. A single LEDT (630 nm) intervention immediately after a damaging eccentric exercise bout was effective in terms of attenuating the muscle soreness and muscle strength loss and ROM …	PubMed
Muscle	Sports injuries		Chang	Taiwan (Taipei)	2014	Lasers Med Sci	Five-day, low-level laser therapy for sports-related lower extremity periostitis in adult men: a randomized, controlled trial.	Human RCT	LED phototherapy (with some laser diodes) Periostitis	850 (laser) + 670 (LED) + 880 (LED) + 950 (LED)	1000 + 120 + 200 + 120		43.2	1.4	31.2 cm2		15 /5d	"Balance function, including postural stability testing (PST) and limits of stability (LOS), was also performed to evaluate the function outcome. Patients experienced a significant improvement in pain by day 2 or day 5 after starting LLLT, but here was no significant difference in pain scale between the measurements before (baseline) and after LLLT. Comparing the PST, the group differences of dyn…	PubMed
Muscle	Exercise		Antonialli	Brazil (São Paulo)	2014	Lasers Med Sci	Phototherapy in skeletal muscle performance and recovery after exercise: effect of combination of super-pulsed laser and light-emitting diodes.	Human RCT/DB	Muscle performance and recovery LED phototherapy LED cluster	905 + 875 + 670								"Pre-exercise phototherapy with combination of low-level laser and LEDs, mainly with 30 J dose, significantly increases performance, decreases DOMS, and improves biochemical marker related to skeletal muscle damage." Comment: The parameters are quite complex in this study - read the full text for further information. Star: An interesting paper with parameters well reported and good outcome!	PubMed
Nerves	CNS: Bell's palsy		Ng & Chu	China (Hong Kong)	2014	J Chiropr Med	Treatment of Bell's Palsy Using Monochromatic Infrared Energy: A Report of 2 Cases.	Human Case series	Bell's palsy MIRE treatment with "Anodyne" LED pad device LED phototherapy	890						1800		"The acute case received 19 treatments in 6 weeks. He reported an improvement of 95%. The chronic case received a total of 45 treatments in 9 months. She rated an improvement of 50%." "These 2 patients seemed to respond to a different degree to the MIRE therapy. As 71% of patients with Bell's palsy recover uneventfully without any treatment, the present study describes the course of care but cann…	PubMed
Oral	Dental implants		Gokmenoglu	Turkey (Ordu)	2014	Photomed Laser Surg	The effect of light-emitting diode photobiomodulation on implant stability and biochemical markers in peri-implant crevicular fluid.	Human	LED phototherapy	626	185	0.0385	222	46.2	4.80 cm2	1200	9	"In the control group, significant reduction of ISQ values from week 2 to week 12 were demonstrated. In the LED group, baseline ISQ values were maintained during the study and no significant changes were observed." "LED application to surgical area has a positive effect on the osseointegration process, and implant stability can be maintained."	PubMed
Oral	Oral mucositis		Freitas	Brazil (São Paulo)	2014	Photomed Laser Surg	Chemotherapy-induced oral mucositis: effect of LED and laser phototherapy treatment protocols.	Human Comparison trial	LED phototherapy LED vs LLLT	660 (laser) 630 (LED)	40 80				0.036 cm2 1 cm2 spot size			"The mean VAS and WHO scores were significantly smaller in the LED group (p<0.05). However, both groups required the same number of days to reach score zero for mucositis and pain (p>0.05)."	PubMed
Oral	Oral mucositis		Freide Mdo	Brazil (Salvador, Bahia))	2014	Clin Oral Investig	LED and laser photobiomodulation in the prevention and treatment of oral mucositis: experimental study in hamsters.	Hamster	LED phototherapy LED vs LLLT	660 (laser) 670 (LED)	40 150		16 4.8	4.8 4	4 mm2 0.5 cm2	30 16		"The best results were obtained from the preventive laser and LED photobiomodulation groups; both treatments were effective in diminishing the OM lesions." Comment: The laser parameters seem a little bit unlogical. If the radiation time is 30 seconds with the power output of 40mW, then total dose is 1.2J, not 16J.	PubMed
Pain	Postoperative		Cidral-Filho	Brazil (Florianópolis)	2014	Lasers Med Sci	Light-emitting diode therapy induces analgesia in a mouse model of postoperative pain through activation of peripheral opioid receptors and the L-arginine/nitric oxide pathway.	Mouse	Dose response Biphasic dose response LED phototherapy	950		0.08		1 3 5 7 9 11 13				"In conclusion, our results demonstrate, for the first time, that LEDT (950 nm, 80 mW/cm2) induced a dose–response analgesic effect in the model of PI in mice. At the energy density of 9 J/cm2, LEDT presented the most significant results through (1) activation of peripheral opioid receptors which involve, at least in part, the recruitment of opioid-containing leukocytes to the PI site and (2) act…	PubMed
Pain	Hyperalgesia		Nadur-Andrade	Brazil (São Paulo)	2014	Photochem Photobiol	Analgesic Effect of Light-Emitting Diode (LED) Therapy at Wavelengths of 635 and 945 nm on Bothrops moojeni Venom-Induced Hyperalgesia.	Mouse	LED phototherapy	635 945	110 120			3.76 3.8		41 38		"Both 635 nm and 945 nm LED inhibited mechanical allodynia and hyperalgesia of mice alone or in combination with antivenom treatment, even when the symptoms were already present."	PubMed
Pain	Hyperalgesia		Kerppers	Brazil (Guarapuava)	2014	MedicalExpress (Sáo Paulo)	Antinociceptive action of Light Emitting Diode in an experimental model with hyperalgesia by capsaicin	Rat	LED phototherapy	627	70			7				"The use of LED can be considered as a non-invasive analgesic method as it increases of the nociceptive threshold 24 hours after pain is induced."	SciELO
Respiratory system	COPD		Miranda	Brazil (São Paulo)	2014	Lasers Med Sci	Acute effects of light emitting diodes therapy (LEDT) in muscle function during isometric exercise in patients with chronic obstructive pulmonary disease: preliminary results of a randomized controlled trial.	Human RCT	Muscle function LED phototherapy									"A single application of LEDT minimizes muscle fatigue and increases isometric endurance time."	PubMed
Skin	Peptides		Hochman	Brazil (São Paulo)	2014	Lasers Med Sci	Low-level laser therapy and light-emitting diode effects in the secretion of neuropeptides SP and CGRP in rat skin.	Rat	LED phototherapy	470 660 (LED) 660 808 (laser)	350 350 100 100							"P was released in Infrared Laser Group (p = 0.01); there was no difference in the CGRP secretion among groups. Infrared (808 nm) LLLT enhances neuropeptide [substance P] secretion in healthy rat skin."	PubMed
Stem cells & regeneration	Hind limb ischemia		Park	Korea (Cheonan)	2014	Biomaterials	Enhanced angiogenic effect of adipose-derived stromal cell spheroid with low-level light therapy in hind limb ischemia mice.	Mouse	transplanted human adipose-derived mesenchymal stem cells (hASCs) LED phototherapy	660		0.05		30		600	20	"Spheroid + LLLT group had enhanced the tissue regeneration, including angiogenesis, compared with the ASC group. The spheroid ASCs contributed to tissue regeneration via differentiation and secretion of growth factors. In the spheroid + LLLT group, the survival of spheroid hASCs increased with a concomitant decrease in apoptosis of spheroid hASCs in the ischemic hind limb. The secretion of growt…	PubMed
Tendons	Achilles tendon		Moura Júnior Mde	Brazil (São José dos Campos)	2014	Lasers Med Sci	Effects of low-power LED and therapeutic ultrasound in the tissue healing and inflammation in a tendinitis experimental model in rats.	Rat	Collagenase-induced tendinitis LED phototherapy	640	30			4	0.5 cm2	120	7 14		PubMed
Tendons	Achilles tendon		Xavier	Brazil (Diamantina)	2014	Lasers Med Sci	Low-level light-emitting diode therapy increases mRNA expressions of IL-10 and type I and III collagens on Achilles tendinitis in rats.	Rat	LED phototherapy	880	22				0.5 cm2	170	7 14	"LED (880 nm) was effective in increasing mRNA expression of IL-10 and type I and III collagen. Therefore, LED therapy may have potentially therapeutic effects on Achilles tendon injuries."	PubMed
Toxins	Snake venom		Nadur-Andrade	Brazil (São Paulo)	2014	Photochem Photobiol Sci	Photobiostimulation reduces edema formation induced in mice by Lys-49 phospholipases A2 isolated from Bothrops moojeni venom.	Mouse	LLLT+LED LLLT vs LED LED phototherapy	685 (laser) 635 945 (LED)				2.2 4.0 3.8		15 41 38	2 2 2	"LLL and LED irradiation significantly reduced the edema formation by both myotoxins from 1 up to 6 hours after the injection. Both LLL and LEDs were similar in reducing the edema formation induced by myotoxins. The combined photobiostimulation with antivenom had the same effect in reducing edema as treatment with the LLL or LEDs alone."	PubMed
Wound healing	Burns		Neves	Brazil (Teresina)	2014	Lasers Med Sci	Digital photogrammetry and histomorphometric assessment of the effect of non-coherent light (light-emitting diode) therapy (λ640 ± 20 nm) on the repair of third-degree burns in rats.	Rat	3rd degree burn LED phototherapy	640	110			16		41		"These results demonstrate that the combination of silver sulfadiazine with LED therapy (λ = 640 ± 20 nm, 4 J/cm(2), without contact) improves healing of third-degree burn wounds, significantly reduces the lesion area and increases the granulation tissue, increases the number of fibroblasts, promotes collagen synthesis and prevents burn infections by accelerating recovery." Comment: Parameters we…	PubMed
Wound healing	Surgical wounds		de Oliveira	Brazil (São Paulo)	2014	Lasers Med Sci	The effects of LED emissions on sternotomy incision repair after myocardial revascularization: a randomized double-blind study with follow-up.	Human RCT/DB	LED phototherapy	640				1.2				"Three researchers blindly analyzed the incision photographs to determine hyperemia and wound closure, and they found that the LED group had both less hyperemia and less incision bleeding or dehiscence. The LED therapy (640 nm) had an analgesic effect on the sternotomies of patients who underwent CABG, increasing their incision healing and preventing dehiscence."	PubMed
Wound healing	Ulcers		Dixit	India (Manipal)	2014	India J Plast Surg	Closure of chronic non healing ankle ulcer with low level laser therapy in a patient presenting with thalassemia intermedia: Case report.	Human Case report	LED phototherapy	660+ 950								"Irradiation with LED is a novel method of treatment of chronic wound in thalassemia intermedia, as irradiation with LED can result in complete healing in six weeks with no recurrence at the irradiated site even after follow-up of 6 months."	PubMed
Wound healing	Wounds		de Sousa	Brazil (Salvador, Bahia)	2014	Acta Histochem	Infrared LED light therapy influences the expression of fibronectin and tenascin in skin wounds of malnourished rats--a preliminary study.	Rat	LED phototherapy	846	100			4				"The results of the present study indicate that infrared LED irradiation modulates positively the expression of tenascin and particularly fibronectin."	PubMed
Wound healing	Wounds		Dungel	Austria (Vienna)	2014	Lasers Surg Med	Low level light therapy by LED of different wavelength induces angiogenesis and improves ischemic wound healing.	Rat	LED phototherapy	470 629		0.05 0.05						"LED therapy with both wavelengths significantly increased angiogenesis in the sub-epidermal layer and intramuscularly (panniculus carnosus muscle) which was associated with significantly improved tissue perfusion 7 days after the ischemic insult. Accordingly, tissue necrosis was significantly reduced and shrinkage significantly less pronounced in the LED-treated groups of both wavelengths."	PubMed
Autoimmunity	Multiple sclerosis		Muili	USA (Milwaukee, WI)	2013	PLoS One	Photobiomodulation induced by 670 nm light ameliorates MOG35-55 induced EAE in female C57BL/6 mice: a role for remediation of nitrosative stress.	Mouse	LED phototherapy Experimental autoimmune encephalomyelitis	670	2100	0.028	375	5	75 cm2 (spot size? )	180	7	"Cell culture experiments demonstrated that 670 nm light-mediated photobiomodulation attenuated antigen-specific nitric oxide production by heterogenous lymphocyte populations isolated from MOG immunized mice. Experiments in the EAE model demonstrated down-regulation of inducible nitric oxide synthase (iNOS) gene expression in the spinal cords of mice with EAE over the course of disease, compared…	PubMed
Bone	Bone repair		Ekizer	Turkey (Kayseri)	2013	Lasers Med Sci	Light-emitting diode photobiomodulation: effect on bone formation in orthopedically expanded suture in rats--early bone changes.	Rat	LED phototherapy	618		0.02				1200	11 (?)	"New bone formation area (p = 0.024, 1.48-fold), number of osteoblasts (p < 0.001, 1.59-fold), number of osteoclasts (p = 0.004, 1.43-fold), and number of vessels (p = 0.007, 1.67-fold) showed higher values in the experimental group than the control. Bone histomorphometric measurements revealed that bone architecture in the LPT group was improved." Comment: Parameters were poorly reported.	PubMed
Cells	Proliferation		Lev-Tov	USA (Mather, CA)	2013	Dermatol Surg	Inhibition of fibroblast proliferation in vitro using low-level infrared light-emitting diodes.	In vitro	Dose response (or biphasic dose response, since they use very high doses) LED phototherapy	830				80 160 320				"IR LLLT can effectively inhibit fibroblast proliferation in vitro without altering viability and holds promise for the treatment of scars." Comment: I'll interpret this result as positive, even though the outcome was proliferation inhibition.	PubMed
Cells	Proliferation		Lev-Tov	USA (Mather, CA)	2013	Dermatol Surg	Inhibition of fibroblast proliferation in vitro using red light-emitting diodes.	In vitro	Dose response (or biphasic dose response, since they use very high doses) LED phototherapy	633				160 320 640				"At certain fluences, red LLLT can effectively inhibit fibroblast proliferation in vitro without altering viability and holds promise for the treatment of scars and other proliferative skin diseases." Comment: They used very high doses, obviously purposefully. Since their goal was to limit proliferation, I'll interpret this result as positive, even though the outcome was proliferation inhibition.	PubMed
Circulation	Angiogenesis		de Sousa	Brazil (Salvador, Bahia)	2013	Lasers Med Sci	Laser and LED phototherapies on angiogenesis.	Rat	Cutaneous wounds LED phototherapy LLLT vs LED	660 790 700 530 460	60 50 15 8 22	1.911 1.592 0.0075 0.0040 0.0109	10 10 10 10 10	333 333 4.97 4.97 4.97	1 cm2 (area) spot size varies	168 200 668 1250 456	7 7 7 7 7	"Quantitative results showed that green LED (λ530 ± 20 nm), red LED (λ700 ± 20 nm), λ790 nm laser and λ660 nm laser caused significant increased angiogenesis when compared to the control group. It is concluded that both laser and LED light are capable of stimulating angiogenesis in vivo on cutaneous wounds and that coherence was not decisive on the outcome of the treatment."	PubMed
Circulation	Nitric oxide		Mitchell & Mack	USA (Provo, UT)	2013	Am J Phys Med Rehabil	Low-level laser treatment with near-infrared light increases venous nitric oxide levels acutely: a single-blind, randomized clinical trial of efficacy.	Human RCT/SB	MIRE treatment with "Anodyne" LED pad device LED phototherapy	890	636							"LLLT increased NO levels in venous blood draining from the treatment site in healthy subjects. The peak increase in NO occurred 5 mins into the treatment, after which it slowly waned. Further research is necessary to assess NO increases with LLLT in patients with pathologies."	PubMed
Dermatology	Herpes labialis		Dougal & Lee	UK (Durham)	2013	Clin Exp Dermatol	Evaluation of the efficacy of low-level light therapy using 1072 nm infrared light for the treatment of herpes simplex labialis.	Human RCT	LED phototherapy	1072						180	6	"The median time to healing for the active group was 129 h, compared with 177 h for the control group, which was significant (P = 0.01)."	PubMed
Dermatology	Herpes zoster		Park	Korea (Seoul)	2013	Ann Dermatol	The Effects of 830 nm Light-Emitting Diode Therapy on Acute Herpes Zoster Ophthalmicus: A Pilot Study.	Human	LED phototherapy HEALITE device (Lutronic)	830		0.055				600	2/wk	"The mean time required for wound healing was 13.14±2.34 days in group B and 15.92±2.55 days in group A (p=0.006). From day 4, the mean VAS score showed a greater improvement in group B, compared with group A. A marginal but not statistically significant difference in the VAS scores was observed between the two groups (p=0.095)."	PubMed
Eyes	Age-related macular degeneration		Kokkinopoulos	UK (London)	2013	Neurobiol Aging	Age-related retinal inflammation is reduced by 670 nm light via increased mitochondrial membrane potential.	Mouse	LED phototherapy Age-related macular degeneration (complement factor H deficiency)	670		0.04				90	5	"Aged mice were exposed to only five 90-second exposures over 35 hours. This significantly increased mitochondrial membrane polarization and significantly reduced macrophage numbers and tumor necrosis factor (TNF)-alpha levels, a key proinflammatory cytokine. Three additional inflammatory markers were assessed; complement component 3d (C3d), a marker of chronic inflammation and calcitonin, and a …	PubMed
Eyes	Age-related macular degeneration		Begum	UK	2013	PLoS One	Treatment with 670 nm light up regulates cytochrome C oxidase expression and reduces inflammation in an age-related macular degeneration model.	Mouse	LED phototherapy Age-related macular degeneration (complement factor H deficiency)	670						360	28	"Exposed animals had significant increase in cytochrome c oxidase (COX), which is a mitochondrial enzyme regulating oxidative phosphorylation. There was a significant reduction in complement component C3, an inflammatory marker in the outer retina. Vimetin and glial fibrillary acidic protein (GFAP) expression, which reflect retinal stress in Muller glia, were also significantly down regulated. Th…	PubMed
Eyes	Diabetic retinopathy		Tang	USA (Ohio)	2013	Invest Ophthalmol Vis Sci	Low-intensity far-red light inhibits early lesions that contribute to diabetic retinopathy: in vivo and in vitro.	Rat + In vitro	LED phototherapy Diabetic eye	670		0.025		6		240	30 or 70	Red light ameliorated lesions of diabetic retinopathy in vivo and reduced oxidative stress and cell death in vitro.	PubMed
Eyes	Light-induced damage		Marco	Italy (L'Aquila)	2013	Am J Neurodegener Dis	The time course of action of two neuroprotectants, dietary saffron and photobiomodulation, assessed in the rat retina.	Rat	LED phototherapy Light-induced damage Preconditioning	670				5				"Preconditioning the retina with saffron or PBM reduced photoreceptor death, preserved the population of surviving photoreceptors and reduced the upregulation of GFAP in Müller cells. At the daily dose of saffron used (1 mg/kg), protection was detectable at 2 d, increasing to 10 d. At the daily dose of PBM used (5 J/cm(2) at 670 nm) protection was detectable at 5 d, increasing to 7-10 d."	PubMed
Eyes	Light-induced damage		Albarracin	Australia (Canberra)	2013	BMC Neurosci	670 nm light mitigates oxygen-induced degeneration in C57BL/6J mouse retina.	Mouse	LED phototherapy Oxygen-induced damage	670		0.06		9		180	5	"Pretreatment with 670 nm red light reduced expression of markers of oxidative stress and C3, and slowed, but did not prevent, photoreceptor loss over the time course of hyperoxia exposure."	PubMed
Eyes	Oxygen-induced damage		Natoli	Australia (Canberra)	2013	PLoS One	670nm photobiomodulation as a novel protection against retinopathy of prematurity: evidence from oxygen induced retinopathy models.	Mouse & Rat	LED phototherapy Oxygen-induced damage & Lung damage	670				9		180	7 / 18	"670 nm light reduced neovascularisation, vaso-obliteration and abnormal peripheral branching patterns of retinal vessels in OIR. The neural retina was also protected against OIR by 670 nm light exposure. OIR-exposed animals had severe lung pathology, including haemorrhage and oedema, that was significantly reduced in 670 nm+OIR light-exposed animals."	PubMed
Eyes	Optic nerve injury		Szymanski	Australia (Crawley)	2013	PLoS One	Paranode Abnormalities and Oxidative Stress in Optic Nerve Vulnerable to Secondary Degeneration: Modulation by 670 nm Light Treatment.	Rat	LED phototherapy Partial optic nerve transection Cytochrome oxidase	670								"When assessed following 3 months of 670 nm light treatment after injury, cytochrome c oxidase activity remained significantly increased compared to normal and PT handled ON (ON including both the dorsal injury site and the ventral region, p = 0.004, dF = 2, Fig. 4e, representative images in Fig. 4f)." "As expected, there was a significant decrease in numbers of retrogradely labelled RGCs in cent…	PubMed
Eyes	Age-related macular degeneration		Kokkinopoulos I	UK (London)	2013	J Photochem Photobiol B	670 nm LED ameliorates inflammation in the CFH−/− mouse neural retina	Mouse	Retinal inflammation (complement factor H deficiency) LED phototherapy	670		0.04				90	4	"These regimes significantly reduced activated macrophage number, TNF-alpha and MIF protein expression levels. Immuno-reactivity to C3, C3b and calcitonin, all markers of inflammatory status were also altered. Finally, innate immune proteins, TLR 2 and 4, showed a marked decrease in protein expression."	PubMed
Nerves	PNS		Cidral-Filho	Brazil (Florianópolis)	2013	Eur J Pain	Light-emitting diode therapy induces analgesia and decreases spinal cord and sciatic nerve tumour necrosis factor-α levels after sciatic nerve crush in mice.	Mouse	LED phototherapy	950		0.08		2,5			15	"Compared with the SNC group, LEDT reduced mechanical hypersensitivity but not cold hypersensitivity which is induced by SNC, decreased spinal cord and sciatic nerve levels of tumour necrosis factor alpha (TNF-α) but did not alter interleukin (IL)-1β and IL-10 levels, and finally, failed to accelerate motor functional recovery and morphological nerve regeneration."	PubMed
Nerves	PNS		Telemeco & Schrank	USA (Winchester, VA)	2013	J Lasers Med Sci	The Effect of Light Therapy on Superficial Radial Nerve Conduction Using a Clustered Array of Infrared Super luminous Diodes and Red Light Emitting Diodes.	Human RCT/SB	Nerve conduction LED phototherapy LED cluster	880 + 660								"Light irradiation using a cluster probe containing infrared super luminous and red light emitting diodes does not impact the neurophysiological properties of the superficial radial nerve."	PubMed
Oncology	Tumor growth		Zaichkina	Russia	2013	Biofizika	[Influence of low-dose-rate red and near-infrared radiations on the level of reactive oxygen species, the genetic apparatus and the tumor growth in mice in vivo]. [Article in Russian]	Mouse	LED phototherapy (and laser)	633 (laser) 650+ 850 (LED)								"Adaptogenic and anticarcinogenic effects of studied radiations were revealed. The values of these effects were not different from those in animals pre-irradiated with the X-rays. The relationship between the level of ROS production and adaptive response induction in the mice under the influence of non-ionizing radiation was first ascertained. The experimental data obtained may indicate a similar…	PubMed
Oral	Periodontium		Chang	Singapore	2013	J Periodontal Res	Irradiation by light-emitting diode light as an adjunct to facilitate healing of experimental periodontitis in vivo.	Rat	Experimental periodontitis LED phototherapy	660				5 10 15			1	"Reduction of inflammation, accelerated collagen deposition and realignment was noted following irradiation with LED light at densities of 10 and 15 J/cm2, and temporary reduction of periodontal bone loss, as well as bundle bone apposition, was noted at day 3 in rats treated with 10 J/cm2 light."	PubMed
Oral	Orthodontics		Fonseca	Brazil (Londrina)	2013	Lasers Med Sci	Effects of light emitting diode (LED) therapy at 940 nm on inflammatory root resorption in rats.	Rat	LED phototherapy Root resorption	940				4				"In conclusion, the results suggest that LED therapy improved periodontal tissue repair and decreased inflammation and root resorption after the application of orthodontic force."	PubMed
Respiratory system	COPD		Miranda	Brazil (São Paulo)	2013	Trials	Effects of light-emitting diodes on muscle fatigue and exercise tolerance in patients with COPD: study protocol for a randomized controlled trial.	Study protocol	LED phototherapy										PubMed
Skin	Acne vulgaris		Kwon	Korea (Seoul)	2013	Br J Dermatol	The clinical and histological effect of home-use, combination blue-red LED phototherapy for mild-to-moderate acne vulgaris in Korean patients: a double-blind, randomized controlled trial.	Human RCT/DB	LED phototherapy	420 + 660								"At the final visit at 12 weeks, both inflammatory and noninflammatory acne lesions had decreased significantly, by 77% and 54%, respectively, in the treatment group. No significant difference was observed in the control group. In the treatment group, sebum output reduction, attenuated inflammatory cell infiltrations and a decreased size of the sebaceous gland were found. The immunostaining inten…	PubMed
Skin	Atopic dermatitis		Kim	Korea (Goyang)	2013	J Dermatol Sci	850nm light-emitting-diode phototherapy plus low-dose tacrolimus (FK-506) as combination therapy in the treatment of Dermatophagoides farinae-induced atopic dermatitis-like skin lesions in NC/Nga mice.	Mouse	LED phototherapy	850								"The use of combination of LED phototherapy and low-dose immunosuppressant improved Df-induced AD-like skin lesions in an NC/Nga mouse model by dominantly reducing IgE, NO, suppressing Th2-mediated immune responses, and inhibiting inflammatory cells, as well as improving skin barrier function."	PubMed
Skin	Laser skin resurfacing wounds / erythema		Oh	Korea (Seoul)	2013	Dermatol Surg	Efficacy of light-emitting diode photomodulation in reducing erythema after fractional carbon dioxide laser resurfacing: a pilot study.	Human Split-face	LED phototherapy (Smartlux, Medmix)	635		0.075				900	7	"The postlaser erythema resolved faster on the experimental side than the control side, with improvements noted according to physician assessment and chromometer erythema index. Statistically significant improvements between the two sides were first noted on day 4." "Treatment using a 635-nm-wavelength LED array decreases the intensity and duration of post-fractional CO2 laser treatment erythema.…	PubMed
Stem cells & regeneration	Bone marrow stem cells		Li	Taiwan	2013	Conf Proc IEEE Eng Med Biol Soc	Effects of low level light irradiation on the migration of mesenchymal stem cells derived from rat bone marrow.	In vitro	LED phototherapy Scratch wound assay	630 ±34 850 ±84		0.015 0.010		4 4		254 384		"Wound healing assay showed both red and NIR light irradiation increased cell mobility. Red and NIR light enhanced transmembrane migration of rbMSCs up to 292.9% and 263.6% accordingly. This agreed with enzymatic activities of MMP-2 and MMP-9 enhanced by irradiation. F-actin accumulation and distribution correlated to increased migration in light-irradiated MSCs. Reactive oxygen species productio…	PubMed
Wound healing	Wounds		Oliveira Sampaio	Brazil (Salvador, Bahia)	2013	Lasers Med Sci	Effect of laser and LED phototherapies on the healing of cutaneous wound on healthy and iron-deficient Wistar rats and their impact on fibroblastic activity during wound healing.	Rat	Cutaneous wound Healthy rats Iron-deficient rats LED phototherapy LED vs LLLT	660 (LLLT) 700 (LED)	40 15			10 10	0.04 cm2 1 cm2	260 670		"It is concluded that the use of LED light caused a significant positive biomodulation of fibroblastic proliferation on anemic animals and laser was more effective on increasing proliferation on non-anemics."	PubMed
Wound healing	Surgical wounds		Dixit	India (Manipal)	2013	Indian J Palliat Care	Photobiomodulation of surgical wound dehiscence in a diabetic individual by low-level laser therapy following median sternotomy.	Human Case report	Diabetic patient Delayed CABG sternotomy wound healing LED phototherapy LED cluster (34+35)	660 + 950								"After irradiation, proliferation of healthy granulation tissue was observed with decrease in scores of PUSH for sternal dehiscence and VAS for bilateral shoulders and sternal dehiscence. We found that LLLT irradiation could be a novel method of treatment for chronic sternal dehiscence following coronary artery bypass grafting, as it augments wound healing with an early closure of the wound defic…	PubMed
Wound healing	Venous ulcer		Park	Korea (Seoul)	2013	J Dermatolog Treat	Treatment of refractory venous stasis ulcers with autologous platelet-rich plasma and light-emitting diodes: a pilot study.	Human	LED phototherapy	635+ 830				108				"The combined autologous PRP and LED therapy was well tolerated and safe. A statistically significant improvement was observed post-therapeutically in the clinical parameters of pain, itching, heaviness, paresthesia, cramps, and leg swelling. There was also a significant decrease in ulcer size. None of the patients showed worsening of their venous stasis ulcer. Regarding subject satisfaction with…	PubMed
Wound healing	Wounds		Min&Goo	Korea (Daegu)	2013	Laser Ther	830 nm light-emitting diode low level light therapy (LED-LLLT) enhances wound healing: a preliminary study.	Human Case series	LED phototherapy	830		0.100		60				"There were 5 patients with ages ranging from 7 to 54 years, comprising 2 males and 3 females. The study followed 5 wounds, namely 2 acute excoriation wounds; 1 acute/subacute dog bite with infection; 1 subacute post-filler ulcerated wound with necrotic ischemic tissue and secondary infection; and 1 subacute case of edema and infection of the lips with herpes simplex involvement after an illegal …	PubMed
Wound healing	Wounds		de Oliveira	Brazil (Teresina)	2013	Rev Bras Eng Biomed	Low-intensity laser therapy and led (light emitting diode) therapy in mechanical resistance of Rattus norvegicus chest inscision with implant of steel wire for sternal suture	Rat	LED vs LLLT LED phototherapy	640 660			6 10 6 10					"Both LILT and LED can promote wound healing at the tested doses with increased tissue resistance, although its elasticity is reduced."	SciELO
Autoimmunity	Multiple sclerosis		Muili	USA (Milwaukee, WI)	2012	PLoS One	Amelioration of experimental autoimmune encephalomyelitis in C57BL/6 mice by photobiomodulation induced by 670 nm light.	Mouse	LED phototherapy Experimental autoimmune encephalomyelitis	670	2100	0.028	375 skin 0.432 spinal cord	5 skin 0.012 spinal cord	75 cm2 array	180		"Disease was induced with myelin oligodendrocyte glycoprotein (MOG) according to standard laboratory protocol. Mice received 670 nm light or no light treatment (sham) administered as suppression and treatment protocols. 670 nm light reduced disease severity with both protocols compared to sham treated mice. Disease amelioration was associated with down-regulation of proinflammatory cytokines (int…	PubMed
Brain	Stroke		Boonswang	USA (Easton, PA)	2012	BMJ Case Rep	A new treatment protocol using photobiomodulation and muscle/bone/joint recovery techniques having a dramatic effect on a stroke patient's recovery: a new weapon for clinicians.	Case report	LED phototherapy	660 850	1400				0.196 cm2			"The patient in this case report experienced a dramatic recovery/rehabilitation outcome after being treated with the treatment protocol."	PubMed
Brain	Brain injury		Nawashiro	Japan	2012	Photomed Laser Surg	Focal increase in cerebral blood flow after treatment with near-infrared light to the forehead in a patient in a persistent vegetative state.	Case report	LED phototherapy (23 diodes)	850	299	0.0114		20.5	0.95 cm2 /LED	1800	146	“Transcranial LED might increase rCBF with some improvement of neurological condition in severely head-injured patients.” Comment: Parameters are well reported in a table.	PubMed
Brain	Parkinson's disease		Peoples	Australia (Sydney)	2012	Parkinsonism Relat Disord	Photobiomodulation enhances nigral dopaminergic cell survival in a chronic MPTP mouse model of Parkinson's disease.	Mouse	MPTP LED phototherapy	670		0.04 (scalp) --> 0.0053 (brain)		0.5		90	10	"In summary, exposure to NIr either at the same time or well after chronic MPTP insult saved many SNc dopaminergic cells from degeneration."	PubMed
Brain	Parkinson's disease		Peoples	Australia (Sydney)	2012	ISRN Neurol	Survival of Dopaminergic Amacrine Cells after Near-Infrared Light Treatment in MPTP-Treated Mice.	Mouse	MPTP LED phototherapy Retinal damage (eyes)	670				0.5		90		"In summary, we showed that NIr treatment was able to both protect (simultaneous series) and rescue (posttreatment series) TH(+) cells of the retina from parkinsonian insult."	PubMed
Circulation	Microcirculation		Mak & Cheing	China (Hong Kong)	2012	Photomed Laser Surg	Immediate effects of monochromatic infrared energy on microcirculation in healthy subjects.	Human RCT	MIRE treatment with "Anodyne" LED pad device LED phototherapy	890	720 (60 LED)			108	22.5 cm2	1800		"A 30-min MIRE produced a significantly greater increase in the capillar blood velocity (CBV) and flux of the feet in the active MIRE group than in the placebo and control groups."	PubMed
Eyes	Age-related macular degeneration		Rutar	Australia (Canberra)	2012	J Neuroinflammation	670-nm light treatment reduces complement propagation following retinal degeneration.	Rat	LED phototherapy	670				9		180	5	"Our data indicate that 670-nm light pretreatment reduces lipid peroxidation and complement propagation in the degenerating retina. These findings have relevance to the cellular events of complement activation underling the pathogenesis of AMD, and highlight the potential of 670-nm light as a non-invasive anti-inflammatory therapy."	PubMed
Eyes	Light-induced damage		Albarracin & Valter	Australia (Canberra)	2012	Photochem Photobiol	670 nm red light preconditioning supports Müller cell function: evidence from the white light-induced damage model in the rat retina.	Rat	LED phototherapy	670		0.06		9		180	5	Red light pretreatment ameliorated the light-induced alterations in the expression of Müller-cell specific markers for structure, stress, metabolism and inflammation.	PubMed
Eyes	Light-induced damage		Albarracin & Valter	Australia (Canberra)	2012	Adv Exp Med Biol	Treatment with 670-nm light protects the cone photoreceptors from white light-induced degeneration.	Rat	LED phototherapy Light-induced damage	670								Damaging effects of white light on the photoreceptor population, function and structure were ameliorated by red light.	PubMed
Fertility, genitals, etc.	Dysmenorrhea		Shin	Korea (Yangsan)	2012	Arch Gynecol Obstet	Skin adhesive low-level light therapy for dysmenorrhoea: a randomized, double-blind, placebo-controlled, pilot trial.	Human RCT/DB	LED phototherapy	610		0.001				1200		"The pain reduction rate was 83 % in the active LLLT group, whereas there was only a slight and temporary reduction in pain in the placebo LLLT group. Changes of VAS within 6 months of LLLT showed statistical significance (p = 0.001) over placebo control." "In conclusion, this study supported our hypothesis that the direct cause of dysmenorrhoea might not be changes in bioactive substances, such …	PubMed
Fertility, genitals, etc.	Nipple trauma		Chaves	Brazil (Belo Horizonte)	2012	Photomed Laser Surg	LED phototherapy improves healing of nipple trauma: a pilot study.	Human Controlled	LED phototherapy	860	50	0.05		4	1 cm2	79		"A significant difference between the experimental and control groups was observed for the healing of nipple lesions (p<0.001). The pain intensity was significantly reduced only in the experimental group (p<0.001)." "Preliminary results demonstrated the prototype apparatus for LED phototherapy to be an effective tool in accelerating the healing of nipple trauma." Comment: The baseline pain was hi…	PubMed
Heart	Coronary arteries		Plass	Austria (Vienna)	2012	Ann Thorac Surg	Light-induced vasodilation of coronary arteries and its possible clinical implication.	In vitro	LED phototherapy Dose response Biphasic dose response	680 (laser) 670 (LED)				1.5 2.5 5 10				"Vessels exposed to either light source showed a remarkable as well as comparable photorelaxation at definite energy densities. This effect is mediated by an intracellular nitric oxide-dependent mechanism. As LED sources are of small size, simple, and inexpensive build-up, they may be used during routine coronary artery bypass surgery to ease suturing of anastomosis by target vessel vasodilation."	PubMed
Immunity	Lymphocytes		Cheong	Korea	2012	J Dermatol Sci	Irradiation of light emitting diode at 850nm inhibits T cell-induced cytokine expression.	In vitro	LED phototherapy Wavelength comparison	415- 940								"Lower doses of LED irradiation at 850nm inhibited T cell-derived cytokines without inducing cell death in both Jurkat T cells and human T cells. Repeated exposure resulted in a greater increase of inhibitory effects than that observed with a single exposure, and these effects were identified in the NC/Nga AD model." "Although more remains to be clarified, these results may support the clinical a…	PubMed
Joints	Osteoarthritis		Hsieh	Taiwan (Taipei)	2012	J Orthop Sports Phys Ther	Therapeutic effects of short-term monochromatic infrared energy therapy on patients with knee osteoarthritis: a double-blind, randomized, placebo-controlled study.	Human RCT/PB	MIRE treatment with "Anodyne" LED pad device LED phototherapy	890	6240			83.2		2400	6	"Short-term MIRE therapy provided no beneficial effects to body functions, activities, participation, and quality of life in patients with knee OA." Comment: Because of the biphasic dose response, this dose might have been too high. However, this isn't clear and should be investigated.	PubMed
Joints	Osteoarthritis		Hsieh	Taiwan (Taipei)	2012	Arch Phys Med Rehabil	Short-term effects of 890-nanometer radiation on pain, physical activity, and postural stability in patients with knee osteoarthritis: a double-blind, randomized, placebo-controlled study.	Human RCT/PB	MIRE treatment with "Anodyne" LED pad device LED phototherapy	890	6240			41.6 /knee		2400	6	"Short-term 890-nm radiation therapy for patients with knee OA provided no beneficial effect in improving pain, physical activity, and postural stability." Comment: Because of the biphasic dose response, this dose might have been too high. However, this isn't clear and should be investigated.	PubMed
Nerves	PNS		Serafim	Brazil (Londrina)	2012	Lasers Med Sci	Effects of 940 nm light-emitting diode (led) on sciatic nerve regeneration in rats.	Rat	Nerve injury LED phototherapy	940	2016-05-09			4	1 cm2	420	10	"The morphological analysis of the nerve indicated that phototherapy can reduce the migration of mononuclear cells to damaged tissue, which reduces areas of edema and fiber degeneration. A 940 nm LED phototherapy source seems to favor the early functional recovery of the injured sciatic nerve."	PubMed
Oral	Periodontium (in vitro)		Choi	Korea (Gwangju)	2012	Lasers Med Sci	Inflammatory cytokines are suppressed by light-emitting diode irradiation of P. gingivalis LPS-treated human gingival fibroblasts: inflammatory cytokine changes by LED irradiation.	In vitro	Inflammation LED phototherapy	635		0.005				3600 = 1h		"LPS treatment of gingival fibroblasts led to the increased release of the pro-inflammatory-related cytokines interleukin-6 (IL-6) and IL-8, whereas LED irradiation inhibited their release. Analysis of MAPK signal transduction revealed a considerable decrease in p38 phosphorylation in response to 635-nm radiation either in the presence or absence of LPS. In addition, 635-nm LED irradiation signif…	PubMed
Oral	Oral mucositis		Hodgson	USA (Milwaukee, WI)	2012	Support Care Cancer	Amelioration of oral mucositis pain by NASA near-infrared light-emitting diodes in bone marrow transplant patients.	Human RCT & DB?	LED phototherapy	670		0.05		4		80	14	"Phototherapy demonstrated a significant reduction in patient-reported pain as measured by the WHO criteria in this patient population included in this study. Improvement trends were noted in most other assessment measurements."	PubMed
Oral	Orthodontics		Uysal	Turkey (Kayseri)	2012	Eur J Orthod	Resonance frequency analysis of orthodontic miniscrews subjected to light-emitting diode photobiomodulation therapy.	Rabbit	Orthodontic miniscrews to rabbit tibia LED phototherapy	618								"Within the limits of this in vivo study, the present RFA findings suggest that LPT might have a favourable effect on healing and attachment of titanium orthodontic miniscrews."	PubMed
Skin	Melanin		Kim	Korea (Dongguk)	2012	Acta Derm Venereol	Light-emitting diodes at 830 and 850 nm inhibit melanin synthesis in vitro.	In vitro	LED phototherapy	830 850				1-20 1				"These results indicate that LEDs could potentially be used to treat melanin-overproducing skin conditions."	PubMed
Skin	Psoriasis		Kleinpenning	Netherlands	2012	J Eur Acad Dermatol Venereol	Efficacy of blue light vs. red light in the treatment of psoriasis: a double-blind, randomized comparative study.	Human Comparison trial	LED phototherapy	420 630		0.100 0.050		120 60		1200 1200	12 12	"Clinical improvement was seen after treatment with blue as well as after treatment with red light. With respect to scaling and induration, no major differences between both light sources were seen. Improvement of erythema, however, continued in blue light irradiated plaques throughout the whole study period, whereas after red light no significant improvement was seen after six illuminations."	PubMed
Skin	Flap		Nishioka	Brazil (São Paulo)	2012	Lasers Med Sci	LED (660 nm) and laser (670 nm) use on skin flap viability: angiogenesis and mast cells on transition line.	Rat	LED phototherapy LLLT vs LED	660 laser 670 LED			0.14 0.14 2.49				5	"LED and LLLT with the same total energies were effective in increasing viability of random skin flaps. LED was more effective in increasing the number of mast cells and blood vessels in the transition line of random skin flaps."	PubMed
Skin	Cell protection		Tian	Korea (Goyang)	2012	Dermatol Surg	Antiphotoaging effects of light-emitting diode irradiation on narrow-band ultraviolet B-exposed cultured human skin cells.	In vitro	Wavelength combination Biphasic dose response LED phototherapy	630 660 830 850				1 2 5 10 20				"The combination of 630/850- or 660/830-nm irradiation led to better direct and indirect antiphotoaging outcomes than single LED wavelengths in NB-UVB-irradiated cultured normal human skin cells."	PubMed
Stem cells & regeneration	Osteogenesis		Peng	China (Wuhan)	2012	Lasers Med Sci	The effect of noncoherent red light irradiation on proliferation and osteogenic differentiation of bone marrow mesenchymal stem cells.	In vitro	LED phototherapy	620		0.00667		1 2 4		150 300 600		"In conclusion, nonconherent red light can promote proliferation but cannot induce osteogenic differentiation of MSCs in normal media, while it enhances osteogenic differentiation and decreases proliferation of MSCs in media with osteogenic supplements."	PubMed
Toxins	Snake venom		Nadur-Andrade	Brazil (São Paulo)	2012	Lasers Med Sci	Effects of photobiostimulation on edema and hemorrhage induced by Bothrops moojeni venom.	Mouse	LED phototherapy LLLT vs LED	685 635 945				2.2				"In conclusion, both LLL and LED irradiation reduced venom-induced local effects even though symptoms were already present."	PubMed
Wavelengths	Blue & Green		Fushimi	Japan (Osaka)	2012	Wound Repair Regen	Green light emitting diodes accelerate wound healing: characterization of the effect and its molecular basis in vitro and in vivo.	Mouse	LED phototherapy Wound healing	456 518 638								"In conclusion, we demonstrate that green LEDs promote wound healing by inducing migratory and proliferative mediators, which suggests that not only red LEDs but also green LEDs can be a new powerful therapeutic strategy for wound healing."	PubMed
Wound healing	Wounds		De Castro	Brazil (Salvador, Bahia)	2012	AIP Conference Proceedings 1486	Assessment of the effects of laser or LED photobiomodulation on hypothyroid rats of cutaneous wound healing: A morphometric study.	Rat	LED phototherapy LLLT vs LED	630 (LED) 660 (laser)	150 40			24 24	0.5 cm2 4 mm2			"This study has shown that hypothyroidism delays wound healing and Laser and LED photobiomodulation using 24 J/cm2 per session improved cutaneous wound healing in hypothyroid rats."	AIP
Wound healing	Burns		Lee & Kim	Korea (Seoul)	2012	J Cosmet Laser Ther	The systemic effect of 830-nm LED phototherapy on the wound healing of burn injuries: A controlled study in mouse and rat models.	Mouse Rat	Systemif effects (wound on back; irradiation on abdomen) LED phototherapy	830								"LED phototherapy on the abdomen produced faster wound healing of the uniform burn wounds than in animals with the same burn wounds that did not receive LED phototherapy, strongly suggesting the systemic effect of phototherapy." Comment: This study used only five animals, which is a huge limitation.	PubMed
Brain	Brain injury		Naeser	USA (Boston, MA)	2011	Photomed Laser Surg	Improved cognitive function after transcranial, light-emitting diode treatments in chronic, traumatic brain injury: two case reports.	Human Case series	LED phototherapy	870+ 633								“Transcranial LED may improve cognition, reduce costs in TBI treatment, and be applied at home.”	PubMed
Eyes	Light-induced damage		Albarracin	Australia (Canberra)	2011	Invest Ophthalmol Vis Sci	Photobiomodulation protects the retina from light-induced photoreceptor degeneration.	Rat	LED phototherapy Light-induced damage	670		0.06		9		180	5	Red light attenuated histopathological alterations and abolished microglial invasion of the retina.	PubMed
General	LED		Lim S	Korea (Cheonan)	2011	J Soc Inf Disp	Phototherapy and the benefits of LEDs	Review	LED phototherapy	"Radiation from LEDs have been reported beneficial for treating many kinds of minor diseases in our body. UV, blue, green, red, and IR radiation from LEDs has been found effective in curing skin diseases such as psoriasis, vitiligo, atopic dermatitis (eczema), reducing pain, generating collagen and elastics cells, killing acne bacteria, treating hair growth, etc"									Wiley
Immunity	Mast cells		de Carvalho Monteiro	Brazil (Salvador, Bahia)	2011	Photomed Laser Surg	Effect of LED red and IR Photobiomodulation in tongue mast cells in Wistar rats: histological study.	Rat	LED phototherapy	850 630				21.9		73		"Our results lead us to conclude that both red and IR-LED light caused increased mast cell degranulation and that IR-LED light resulted in a greater number of mast cells."	PubMed
Immunity			Lee	Korea (Seoul)	2011	J Photochem Photobiol B	Enhancement of cutaneous immune response to bacterial infection after low-level light therapy with 1072 nm infrared light: a preliminary study.	Mouse	LED phototherapy	1072								"We concluded that 1072 nm infrared light had a photobiomodulation effect which resulted in an enhanced biological immune response to the bacterial infection by MRSA and also increased the expression of VEGF to a significant level."	PubMed
Joints	Osteoarthritis		Oshima	USA (La Jolla, CA)	2011	Biomed Pharmacother	Effect of light-emitting diode (LED) therapy on the development of osteoarthritis (OA) in a rabbit model.	Rabbit	LED phototherapy	630 + 870			2 + 2.5	2.4	44 cm2	600	25	"There was general preservation of the articular surface and decreased levels of inflammation in the osteoarthritic joints with the application of LED therapy. This may provide potential application as a noninvasive treatment."	PubMed
Kidney	Meckel syndrome		Lim	USA (Bloomington, IN)	2011	Nephron Extra	Acceleration of the meckel syndrome by near-infrared light therapy.	Rat	Meckel syndrome LED phototherapy	640- 690								"LED phototherapy initiated after the onset of symptoms was detrimental to MKS-induced pathology. NIR stimulates CCO thereby increasing the kidney's need for oxygen. We hypothesize that cystic compression of the vasculature impairs oxygen availability and the enhanced CCO activity produces more radicals, which are not sufficiently detoxified by the increased CAT activity."	PubMed
Muscle	Exercise		Paolillo	Brazil (São Paulo)	2011	Photomed Laser Surg	Effects of infrared-LED illumination applied during high-intensity treadmill training in postmenopausal women.	Human RCT	LED phototherapy	850		0.031	14400	55.8		1800		"Both groups improved the time of tolerance limit (Tlim) (p<0.05) during submaximal constant-speed testing. The peak torque did not differ between groups. However, the results showed significantly higher values of power [from 56±10 to 73±8 W (p=0.002)] and total work [from 1,537±295 to 1,760±262 J (p=0.006)] for the LED group when compared to the control group [power: from 58±14 to 60±15 W (p≥0.0…	PubMed
Muscle	Exercise		Leal Junior	Brazil (São Paulo)	2011	Lasers Med Sci	Comparison between cold water immersion therapy (CWIT) and light emitting diode therapy (LEDT) in short-term skeletal muscle recovery after high-intensity exercise in athletes--preliminary results.	Human RCT/DB Crossover	LED phototherapy	660 + 850								"There were no significant differences in the work performed during the three Wingate tests (p > 0.05). All biochemical parameters increased from baseline values (p < 0.05) after the three exercise tests, but only active LEDT decreased blood lactate levels (p = 0.0065) and CK activity (p = 0.0044) significantly after treatment. There were no significant differences in CRP values after treatments."	PubMed
Muscle	Exercise-related health improvements		Paolillo	Brazil (São Paulo)	2011	J Cosmet Laser Ther	New treatment of cellulite with infrared-LED illumination applied during high-intensity treadmill training.	Human Controlled	LED phototherapy	850		0.039		106				"The current study combines the benefi ts of physical training with the therapeutic effects of phototherapy. These positive effects lead to an improvement of body aesthetics with a reduction of saddlebag and thigh circumference as well as the treatment of cellulite, possibly due to the increased metabolic activity as observed in the thermal images, as well as also preventing the increase of body …	PubMed
Nerves	Diabetic neuropathy		Nawfar & Yacob	Malaysia (Kota Bharu)	2011	Singapore Med J	Effects of monochromatic infrared energy therapy on diabetic feet with peripheral sensory neuropathy: a randomised controlled trial.	Human RCT/SB	MIRE treatment with "Anodyne" LED pad device LED phototherapy	890							12	"No improvement of neuropathy was observed following MIRE treatment in the neuropathic feet of diabetic patients."	PubMed
Oral	Orthodontics		Esper	Brazil (São José dos Campos)	2011	Lasers Med Sci	The effect of two phototherapy protocols on pain control in orthodontic procedure--a preliminary clinical study.	Human RCT	LED phototherapy LLLT vs LED	660 laser 640 LED	30 100			4 4		25 70		"The laser group did not have statistically significant results in the reduction of pain level compared to the LED group. The LED group had a significant reduction in pain levels between 2 and 120 h compared to the control and the laser groups. The LED therapy showed a significant reduction in pain sensitivity (an average of 56%), after the orthodontic tooth movement when compared to the control …	PubMed
Worms	Flatworm: Dugesia tigrina		Wu & Persinger	Canada (Ontario)	2011	J Photochem Photobiol B	Increased mobility and stem-cell proliferation rate in Dugesia tigrina induced by 880nm light emitting diode.	Dugesia tigrina	LED phototherapy	880				0.01				"These findings suggest that non-coherent light sources with power-densities about 1000 times lower than contemporary low-power laser settings remain effective in generating photobiostimulation effects and warrants further investigation on stem-cell proliferation induced by near-infrared light emitting diodes."	PubMed
Wound healing	Burns		Fiório	Brazil (Chapecó)	2011	J Cosmet Laser Ther	Effect of incoherent LED radiation on third-degree burning wounds in rats.	Rat	3rd degree burn LED phototherapy	640	30			4			8 (?)	"The inflammatory cells as well as the damaged area at the 8th day after burns were significantly lower for the LED-treated group when compared to control. Furthermore, the LED phototherapy effect on cellular migration was even more pronounced at the 16th day." "Our results indicated that the treatment with a LED system was clearly effective in reducing the number of inflammatory cells and improv…	PubMed
Cells	Signalling pathways		Komine	Japan (Kanazawa)	2010	Lasers Med Sci	Activation of the extracellular signal-regulated kinase signal pathway by light emitting diode irradiation.	In vitro	Fibroblasts (NIH3T3) LED phototherapy	627				4				"LED irradiation induced cell growth of NIH3T3 fibroblasts. The expression of PDGF-C had significantly increased in the irradiated group (P < 0.01). Although strong activation of the ERK pathway was observed in the irradiated group, its activation was completely suppressed by the PDGF receptor inhibitor. We concluded that LED irradiation promotes fibroblast proliferation by increasing autocrine p…	PubMed
Brain	Parkinson's disease		Shaw	Australia (Sydney)	2010	J Comp Neurol	Neuroprotection of midbrain dopaminergic cells in MPTP-treated mice after near-infrared light treatment.	Mouse	LED phototherapy	670		0.04 (scalp) --> 0.0053 (brain)		0.5		90	4	"In summary, our results indicate that NIr light treatment offers neuroprotection against MPTP toxicity for dopaminergic cells in the SNc, but not in the ZI-Hyp."	PubMed
Cells	Proliferation		de Sousa	Brazil (Salvador, Bahia)	2010	Photomed Laser Surg	Effect of LED phototherapy of three distinct wavelengths on fibroblasts on wound healing: a histological study in a rodent model.	In vitro	LED phototherapy Blue and green light	460 530 700	22 8 15			10 10 10			4 4 4 (?)	"The quantitative results showed that red LED (700 +/- 20 nm) and green LED (530 +/- 20 nm) showed a significant increase in fibroblast numbers (p < 0.01 and p = 0.02) when compared with the control group."	PubMed
Dermatology	Radiation dermatitis		Fife	USA (Irvine, CA)	2010	Dermatol Surg	A randomized, controlled, double-blind study of light emitting diode photomodulation for the prevention of radiation dermatitis in patients with breast cancer.	Human RCT/DB	LED phototherapy	590						35	30+	"LED photomodulation did not reduce the incidence of radiation-induced skin reactions or interruptions in therapy. ." Note: DeLand published a letter, wondering why the results were so different in this study. He suggests it might be related to the treatment parameters... Metelitsa's commentary also mentions this issue, and also focuses on some differences between the treatments in these two stud…	PubMed
Eyes	Gene expression		Natoli	Australia	2010	Mol Vis	Gene and noncoding RNA regulation underlying photoreceptor protection: microarray study of dietary antioxidant saffron and photobiomodulation in rat retina.	Rat	LED phototherapy	670		0.06		9		180	5	In this study, they also investigated the effects of LLLT on gene expression.	PubMed
Eyes	Optic nerve injury		Fitzgerald	Australia (Crawley)	2010	J Neurotrauma	Near infrared light reduces oxidative stress and preserves function in CNS tissue vulnerable to secondary degeneration following partial transection of the optic nerve.	Rat	LED phototherapy	670		0.0252				1800		"In this study, we show that diffuse transcranial irradiation of the injury site with far red to near infrared (NIR) light (WARP 10 LED array, center wavelength 670 nm, irradiance 252 W/m(-2), 30 min exposure), as opposed to perception of light at this wavelength, reduced oxidative stress in areas of the ON vulnerable to secondary degeneration following partial injury. The WARP 10 NIR light treat…	PubMed
Eyes	Light-induced damage		Qu	China (Sichuan)	2010	Adv Exp Med Biol	Near-infrared light protect the photoreceptor from light-induced damage in rats.	Rat	LED phototherapy Light-induced damage	670	50						5	A red LED was protective against light-induced retinal damage.	PubMed
General	LED		Yeh	Taiwan (Pitou / Peetou)	2010	Renew Sust Energy Rev	Light-emitting diodes—Their potential in biomedical applications	Review	LED phototherapy	"This paper provides a general review on red, green, blue, ultraviolet LED applications in photo rejuvenation and medical treatments of a variety of physical abnormalities, as well as the relief of stress, circadian rhythm disorders, and seasonal affective disorder. The review, concentrated in the papers published after 1990, intends to show that LEDs are well qualified to succeed its more energy…									ScienceDirect
Joints	Arthritis		de Morais	Brazil (São José dos Campos)	2010	Photomed Laser Surg	Anti-inflammatory effect of low-level laser and light-emitting diode in zymosan-induced arthritis.	Rat	LLLT vs LED LED phototherapy LLLT vs dexamethasone Wavelength	628 LED 685 830 Laser	20 20 20			2.5 2.5 2.5	0.8 cm2 0.8 0.8 cm2	100 100 100		"Irradiation with 685 nm and 830 nm laser wavelengths significantly inhibited edema formation, vascular permeability, and hyperalgesia. Laser irradiation, averaged over the two wavelengths, reduced the vascular permeability by 24%, edema formation by 23%, and articular incapacitation by 59%. Treatment with LED (628 nm), with the same fluence as the laser, had no effect in zymosan-induced arthriti…	PubMed
Kidney	Diabetic kidney		Lim	USA (Bloomington, IN)	2010	J Photochem Photobiol B	Effects of low-level light therapy on streptozotocin-induced diabetic kidney.	Rat	LED phototherapy	670		0.035		10.5		300	70	↑cytochrome oxidase activity, ↑cytochrome oxidase expression, ↓serum BUN, ↓serum creatinine, ↓BUN/creatinine ratio, ↓8-hydroxy-2'-deoxyguanosine in kidney "LLLT may be broadly applicable to ameliorate kidney complications induced by diabetes that disrupt antioxidant defense mechanisms."	PubMed
Muscle	Energy metabolism		Hayworth	USA (Austin, TX)	2010	Photochem Photobiol	In vivo low-level light therapy increases cytochrome oxidase in skeletal muscle.	Rat	Cytochrome oxidase LED phototherapy LED cluster (149x)	660				10.8 21.6 32.4		1200 2400 3600		"The findings showed for the first time that in vivo LLLT induced a dose- and fiber type-dependent increase in cytochrome oxidase in muscle fibers. LLLT was particularly effective at enhancing the aerobic capacity of intermediate and red fibers. The findings suggest that LLLT may enhance the oxidative energy metabolic capacity of different types of muscle fibers, and that LLLT may be used to enha…	PubMed
Muscle	Exercise		Baroni	Brazil (Porto Alegre)	2010	Photomed Laser Surg	Effect of light-emitting diodes therapy (LEDT) on knee extensor muscle fatigue.	Human RCT/DB Crossover	LED cluster (34+35)	660 + 850	340 + 1050							"LEDT treatment produced a smaller maximal isometric torque decrease after high-intensity concentric isokinetic exercise, which is consistent with an increase in performance."	PubMed
Muscle	Muscle activity		Kelencz	Brazil (Paraiba)	2010	Photomed Laser Surg	Effect of low-power gallium-aluminum-arsenium noncoherent light (640 nm) on muscle activity: a clinical study.	Human	LED phototherapy	640	116		1.044 2.088 3.132 /point		0.522 cm2			"It was concluded that LED can be used as a clinical tool to increase muscle activity (1.044 J per point) and to prevent fatigue (2.088 J per point), without change in the muscle force."	PubMed
Nerves	PNS		Ishiguro	Japan (Kanazawa)	2010	J Orthop Sci	Effect of near-infrared light-emitting diodes on nerve regeneration.		LED phototherapy	660								"Nerve regeneration was promoted in the LED group. Antioxidation of the chamber fluid significantly decreased from 3 days to 7 days in the control group. In the LED group, antioxidation levels did not decrease until 7 days."	PubMed
Nerves	Diabetic neuropathy		Swislocki	USA (Martinez, CA)	2010	J Pain Symptom Manage	A randomized clinical trial of the effectiveness of photon stimulation on pain, sensation, and quality of life in patients with diabetic peripheral neuropathy.	Human RCT	LED phototherapy LED cluster	870			1800			420	4	"No differences, over time, in any pain intensity scores (i.e., pain intensity immediately post-treatment, average pain, worst pain) or pain relief scores were found between the placebo and treatment groups." "Four treatments with photon stimulation resulted in significant improvements in some pain qualities, sensation, and QOL outcomes in a sample of patients with a significant amount of pain an…	PubMed
Oral	Dentin hypersensitivity		Lizarelli	Brazil (São Carlos)	2010	Laser Phys Lett	Dentin hypersensitivity clinical study comparing LILT and LEDT keeping the same irradiation parameters	Human RCT/SB	LED phototherapy LLLT vs LED	630 (LED) 660 (Laser)	25 25			5.4 5.4	4 mm2			"LILT and LEDT were equally effective to treat dentine hypersensitivity, a 3rd treatment session was not necessary/two sessions are enough."	Wiley
Skin	Scars		Barolet & Boucher	Canada (Montreal)	2010	Lasers Surg Med	Prophylactic low-level light therapy for the treatment of hypertrophic scars and keloids: a case series.	Human Case series	LED phototherapy	805		0.03						"Significant improvements on the NIR-treated versus the control scar were seen in all efficacy measures. No significant treatment-related adverse effects were reported."	PubMed
Skin	Psoriasis		Ablon G	USA (Los Angeles, CA)	2010	Photomed Laser Surg	Combination 830-nm and 633-nm light-emitting diode phototherapy shows promise in the treatment of recalcitrant psoriasis: preliminary findings.	Human Case series	Recalcitrant psoriasis LED phototherapy	633 + 830				126 + 60		1200	2	"Clearance rates at the end of the follow-up period ranged from 60% to 100%. Satisfaction was universally very high."	PubMed
Stem cells & regeneration	Bone marrow stem cells		Li	Taiwan	2010	Photomed Laser Surg	Red-light light-emitting diode irradiation increases the proliferation and osteogenic differentiation of rat bone marrow mesenchymal stem cells.	In vitro	LED phototherapy Osteogenesis	630		0.005 0.015		2 4				"The growth of MSCs was enhanced by red-light LLLI, and the effect became more obvious at low cell density. A single dose of LLLI led only to a short-term increase in MSCs proliferation. A maximal increase in cell proliferation was observed with multiple exposures of LLLI at 15 mW/cm(2) and 4 J/cm(2). The number of colony-forming unit fibroblasts increased when cells were illuminated under the op…	PubMed
Tendons	Achilles tendon		Xavier	Brazil (São Paulo)	2010	Lasers Surg Med	Anti-inflammatory effects of low-level light emitting diode therapy on Achilles tendinitis in rats.	Rat	LED phototherapy	880	22			7.5	0.5 cm2	170	4+ (?)	"Our results showed that LED decreases the inflammatory cells influx and mRNA expression to IL-1 beta, IL-6, tumor necrosis factor-alpha (TNF-alpha) in both phase, and cyclooxygenase-2 (COX-2) just in initial phase (P < 0.05)."	PubMed
Diabetes mellitus	Ulcers and wounds		Minatel	Brazil (Ribeirão Preto)	2009	Lasers Surg Med	Phototherapy promotes healing of chronic diabetic leg ulcers that failed to respond to other therapies.	Human RCT/DB	LED phototherapy	660 + 890	500	0.1						"By day 90, 58.3% of group two ulcers had healed fully and 75% had achieved 90-100% healing. In contrast, only one "placebo" treated ulcer healed fully by day 90; no other ulcer attained > or =90% healing." [Also see additional info]	PubMed
Heart	MI		Lohr	USA (Milwaukee, WI)	2009	J Mol Cell Cardiol	Enhancement of nitric oxide release from nitrosyl hemoglobin and nitrosyl myoglobin by red/near infrared radiation: potential role in cardioprotection.	Rabbit	LED phototherapy	670		0.003 0.06	0.5 11					"As shown in Figure 5B, exposure of the rabbit cardiac preparation to 60 mW/cm2 (11 J) of 670 nm light, in the absence of nitrite, at the time of reperfusion resulted in a significant reduction in infarct size whereas a lower power radiation (3 mW/cm2, 0.5J) was ineffective. Interestingly, when low dose radiation (3 mW/cm2) was combined with low-dose nitrite (0.4 mg/kg) a synergistic effect was o…	PubMed
Liver	Diabetes		Lim	USA (Bloomington, IN)	2009	J Biochem Mol Toxicol	Effects of low-level light therapy on hepatic antioxidant defense in acute and chronic diabetic rats.	Rat	Diabetic rats LED phototherapy	670		0.05		9		300	14 70	"Light treatment was ineffective as an antioxidant therapy in chronic diabetes, but light treatment for 18 days in acutely diabetic rats resulted in the normalization of hepatic glutathione reductase and superoxide dismutase activities and a significant increase in glutathione peroxidase and glutathione-S transferase activities. The results of this study suggest that 670 nm photobiomodulation may…	PubMed
Muscle	Exercise		Leal Junior	Brazil (Caxias do Sul)	2009	Lasers Surg Med	Effect of cluster multi-diode light emitting diode therapy (LEDT) on exercise-induced skeletal muscle fatigue and skeletal muscle recovery in humans.	Human RCT/DB Crossover	LED phototherapy LED cluster (69)	660 + 850								"Active LEDT increased the number of biceps humeri contractions by 12.9% (38.60 [SD +/-9.03] vs. 34.20 [SD +/-8.68], P = 0.021) and extended the elapsed time to perform contractions by 11.6% (P = 0.036) versus placebo. In addition, post-exercise levels of biochemical markers decreased significantly with active LEDT: Blood Lactate (P = 0.042), Creatine Kinase (P = 0.035), and C-Reative Protein lev…	PubMed
Muscle	Exercise		Leal Junior	Brazil (Caxias do Sul)	2009	Photomed Laser Surg	Comparison between single-diode low-level laser therapy (LLLT) and LED multi-diode (cluster) therapy (LEDT) applications before high-intensity exercise.	Human RCT/DB Crossover	LLLT vs LED LED phototherapy LED cluster	810 vs 660+ 850								"In this experimental set-up, only the active LEDT probe decreased post-exercise CK levels after the Wingate cycle test. Neither performance nor blood lactate levels were significantly affected by this protocol of pre-exercise LEDT or LLLT."	PubMed
Skin	Allergy		Chen	Taiwan (Taipei)	2009	J Invest Dermatol	Low-energy visible light irradiation modulates immune responses induced by epicutaneous sensitization with protein antigen.	Mouse	LED phototherapy	633	4					1200	5 ?	"Epicutaneous sensitization has been an important route for protein allergen sensitization in atopic disease. Although the skin is irradiated by sunlight daily, the influence of visible light on epicutaneous sensitization has not been explored. In this study, by using a well-established murine protein-patch model, we show that low-energy visible light (LEVL) irradiation could differentially modul…	PubMed
Skin	Laser skin resurfacing wounds / erythema		Alster & Wanitphakdeedecha	USA (Washington, D.C.)	2009	Dermatol Surg	Improvement of postfractional laser erythema with light-emitting diode photomodulation.	Human Split-face	LED phototherapy	590			4200 (??)	0.1 (??)		35		"The LED-treated facial halves were less erythematous in all 20 patients 24 hours postoperatively. The six patients who received the highest mean energy densities during fractional laser treatment continued to exhibit decreased erythema in the LED-treated areas at 48 hours. At 96 hours post-treatment, no discernible differences between facial halves were observed in any patient." Comment: The par…	PubMed
Skin	Acne vulgaris		Sadick N	USA (New York, NY)	2009	J Cosmet Laser Ther	A study to determine the effect of combination blue (415 nm) and near-infrared (830 nm) light-emitting diode (LED) therapy for moderate acne vulgaris.	Human	LED phototherapy (w/ blue light)	415 + 830								"The combination therapy for acne produced results which were less effective in the reduction of inflammatory lesions than those achieved with the previously reported blue/red combination. Further study with a much larger patient population is warranted." Comment: Why combination instead of only red? Because there is also some data for using blue light for acne ( https://www.ncbi.nlm.nih.gov/pubm…	PubMed
Tendons	Achilles tendon		Casalechi	Brazil (São Paulo)	2009	Lasers Med Sci	The effects of low-level light emitting diode on the repair process of Achilles tendon therapy in rats.	Rat	LED phototherapy	640	100			20	0.5 cm2	120	7 14 21	"This study demonstrated that LED interfered in the repair process of the tendon tissue, reducing the number of fibroblasts in the initial periods and improving the quality of the repair in all periods studied."	PubMed
Tendons	Achilles tendon		Bastos	Brazil (São Carlos)	2009	Laser Phys	Comparative study of laser and LED systems of low intensity applied to tendon healing	Rat	LED phototherapy Laser vs LED	685 630+ 830? 880								"The results showed a real efficiency of treatments based on LEDT and confirmed that LILT seems to be effective on healing process. Although absence of coherence of LED light, tendon healing treatment with this feature was satisfactory and can certainly replace treatments based on laser light applications. Applications of infrared laser at 830 nm and LED 880 nm were more efficient when the aim is…	Springer
Wound healing	Wounds		Dall Agnol	Brazil (São José dos Campos)	2009	Lasers Med Sci	Comparative analysis of coherent light action (laser) versus non-coherent light (light-emitting diode) for tissue repair in diabetic rats.	Rat	Diabetic rats LLLT vs LED LED phototherapy	640 (LED) 660 (laser)	30			6	0.5 cm2	100	1	"The coherent and non-coherent lights produced similar effects during a period of 168 h after the lesions had been made. For the group composed of diabetic animals, 72 h after creation of the lesion, it was observed that the therapy with LEDs had been more efficient than that with the laser in the reduction of the wounds' diameters."	PubMed
Wound healing	Wounds		Tada	Japan (Kanazawa)	2009	J Trauma	Effect of polarized light emitting diode irradiation on wound healing.	Rat	LED phototherapy Polarization									"The right circularly polarized light and linearly polarized light promoted the process of wound healing by increasing the proliferation of fibroblasts, and the right circularly polarized light increased the expression of type 1 procollagen mRNA. The effectiveness of right circularly polarized light suggests that some optical active material, which has a circular dichroic spectrum, takes part in …	PubMed
Brain	Parkinson's disease		Liang	USA (Milwaukee, WI)	2008	Neuroscience	Near-infrared light via light-emitting diode treatment is therapeutic against rotenone- and 1-methyl-4-phenylpyridinium ion-induced neurotoxicity.	In vitro	MPTP LED phototherapy	670		0.05		4		80	1- 20	"Results indicated that LED treatments twice a day significantly increased cellular ATP content, decreased the number of neurons undergoing cell death, and significantly reduced the expressions of reactive oxygen species and reactive nitrogen species in rotenone- or MPP+-exposed neurons as compared to untreated ones."	PubMed
Brain	Parkinson's disease		Ying	USA (Milwaukee, WI)	2008	Brain Res	Pretreatment with near-infrared light via light-emitting diode provides added benefit against rotenone- and MPP+-induced neurotoxicity.	In vitro (striatal and cortical neurons)	Neurotoxins LED phototherapy	670		0.05		4		80	4 8	"Results indicate that pretreatment with NIR-LED significantly suppressed rotenone- or MPP(+)-induced apoptosis in both striatal and cortical neurons (P<0.001), and that pretreatment plus LED treatment during neurotoxin exposure was significantly better than LED treatment alone during exposure to neurotoxins. In addition, MPP(+) induced a decrease in neuronal ATP levels (to 48% of control level) …	PubMed
Development	Embryogenesis		Lim	USA (Bloomington, IN)	2008	J Biochem Mol Toxicol	Attenuation of TCDD-induced oxidative stress by 670 nm photobiomodulation in developmental chicken kidney.	Chicken	LED phototherapy	670				4				"The biochemical indicators of oxidative and energy stress in the kidney were reversed by daily phototherapy, restoring ATP and glutathione contents and increasing antioxidant enzyme activities to control levels. Photobiomodulation also normalized the level of lipid peroxidation increased by TCDD exposure. The results of this study suggest that 670 nm photobiomodulation may be useful as a noninva…	PubMed
Eyes	Optic neuropathy		Rojas	USA (Austin, TX)	2008	J Neurosci	Neuroprotective effects of near-infrared light in an in vivo model of mitochondrial optic neuropathy.	Rat	Optic neuropathy (rotenone) LED phototherapy Cytochrome oxidase	633		0.002		3.6	d = 4.4 cm (?)	1800	2016-07-03	"Rotenone induced a decrease in visual function, as determined by changes in the dark-adapted illuminance sensitivity threshold, escape latency and rate of successful trials in a two-choice visual task, compared with vehicle-treated controls. Behavioral impairment correlated with a decrease in retinal and visual pathway metabolic activity, retinal nerve fiber layer thickness and ganglion cell lay…	PubMed
Immunity	Mast cells		Calderhead	Japan	2008	Laser Ther	One mechanism behind led phototherapy for wound healing and skin rejuvenation: key role of the mast cell	Human	LED phototherapy	830				57		1200	1	"Biopsies were taken before and two days after irradiation and routinely prepared for transmission electron microscopy (TEM), and compared between baseline, irradiated and unirradiated tissue. The TEM in all postirradiated specimens, while clearly showing no damage to the irradiated tissue with all tissue components essentially morphologically normal, demonstrated a mild inflammatory response 48 …	J-STAGE
Nerves	Diabetic neuropathy		Lavery	USA (Temple, TX)	2008	Diabetes Care	Does anodyne light therapy improve peripheral neuropathy in diabetes? A double-blind, sham-controlled, randomized trial to evaluate monochromatic infrared photoenergy.	Human RCT/DB	MIRE treatment with "Anodyne" LED pad device LED phototherapy	890								"Anodyne MIRE therapy was no more effective than sham therapy in the treatment of sensory neuropathy in individuals with diabetes."	PubMed
Oral	Oral mucositis		Sacono	Brazil (Araraquara)	2008	Lasers Surg Med	Light-emitting diode therapy in chemotherapy-induced mucositis.	Hamster	LED phototherapy	630	160	0.127- 0.318		12		37.5	7	"[LLLT] was effective in reducing the severity of chemotherapy-induced mucositis in hamsters and contributed to the healing of the ulcerative oral lesions, though without preventing their occurrence completely" Some possible harm was also noted, which might be related to high light intensity: "However,18% of the specimens in this group presented musculardegeneration visible only by histological e…	PubMed
Oral	Oral mucositis		Lang-Bicudo	Brazil (São Paulo)	2008	Photomed Laser Surg	LED phototherapy to prevent mucositis: a case report.	Human Case report	LED phototherapy LED array Intraoral	880	74			3.6	d = 12.5 mm	1620	5 /chemo round	"The results showed that the patient did not develop oral mucositis during the five chemotherapy cycles, and he had no pain symptoms." Comment: This article nicely visualizes the anatomical sites that were being irradiated, with photographs.	PubMed
Oral	Periodontium		Ozcelik	Turkey (Adana)	2008	J Clin Periodontol	Enamel matrix derivative and low-level laser therapy in the treatment of intra-bony defects: a randomized placebo-controlled clinical trial.	Human RCT	ULOCKS device LED phototherapy	588				4			5	"EMD+LLLT had resulted in less gingival recession (p<0.05), less swelling (p<0.001) and less VAS scores (p<0.02) compared with EMD alone."	PubMed
Skin	Acne vulgaris		Sadick NS	USA (New York, NY)	2008	J Drugs Dermatol	Handheld LED array device in the treatment of acne vulgaris.	Human	LED phototherapy (w/ blue light)	415 + 633								"Lesion counts progressively reduced throughout the 4-week light therapy period and continued to reduce up to 8 weeks posttherapy, with a final average reduction of 69% seen 8 weeks after the treatment course (P>.001). This pattern is similar to previously reported studies."	PubMed
Wound healing	Wounds		Erdle	USA (Rochester, NY)	2008	Dermatol Surg	Effects of continuous-wave (670-nm) red light on wound healing.	Mouse	LED phototherapy Intensity comparison (low, vs medium vs high)	670		0.0016 0.008 0.04		3.6 3.6 3.6		90 450 2250		"Mice exposed to 670-nm red light showed significantly faster healing than control mice. High, medium, and low fluxes of light were all effective after incisional injury. In burn injury, there was improvement in wound healing initially, but the time to repair was unchanged." "Of interest is the finding that healing in the lowest flux group appeared to be better than either the high- or medium-flu…	PubMed
Cells	Fibroblast function		Huang	Taiwan (Hsinchu)	2007	Photomed Laser Surg	In vitro observations on the influence of copper peptide aids for the LED photoirradiation of fibroblast collagen synthesis.	In vitro	LED phototherapy	630								"LED-PI maintained human fibroblast (HS68) viability and increased collagen synthesis when applied by itself. In the combinative stimulation for in vitro collagen production (when LED-PI was followed by Cu-GHK-supplied incubation), stimulated cells showed increased bFGF secretion, P1CP production, and COL1 expression, compared to the LED-PI treatment alone."	PubMed
Dermatology	Radiation dermatitis		DeLand	USA (Lafayette, LA)	2007	Lasers Surg Med	Treatment of radiation-induced dermatitis with light-emitting diode (LED) photomodulation.	Human	LED phototherapy	590				0.15				"In LED-treated patients, 18 (94.7%) had grade 0 or 1 reaction and 1 (5.3%) had grade 2 reaction. Among controls, 4 (14.3%) had a grade 1 reaction, 24 (85.7%) had a grade 2 or 3 reaction. One LED-treated patient (5.3%) and 19 controls (67.9%) had to interrupt treatment." Note: Results are very interesting, but parameters are poorly reported.	PubMed
Skin	Acne vulgaris		Na & Suh	Korea (Seoul)	2007	Dermatol Surg	Red light phototherapy alone is effective for acne vulgaris: randomized, single-blinded clinical trial.	Human Split-face trial	LED phototherapy	635- 670	6			0.185		900	112	"This study shows that red light phototherapy alone can be a new therapeutic option for acne vulgaris." Comment: The parameters were poorly reported.	PubMed
Skin	Rejuvenation		Sitrling & Haslam	UK (Durham)	2007	J Cosmet Laser Ther	A self-reported clinical trial investigates the efficacy of 1072 nm light as an anti-ageing agent.	Human RCT/DB	LED phototherapy	1072							42- 56	"Between 52% and 57% of volunteers were able to accurately identify an improvement in the fine lines and wrinkles of the treated areas of skin. Fewer volunteers, between 37% and 46%, observed an improvement in the bags under the treated eye or eyes, albeit with an emphatic statistical significance." "Regular application of a non-thermal quantity of 1072nm light around the eyes demonstrated effica…	PubMed
Skin	Rejuvenation		Baez & Reilly	Australia (Sydney)	2007	J Cosmet Laser Ther	The use of light-emitting diode therapy in the treatment of photoaged skin.	Human	LED phototherapy Omnilux LED device	633 + 830			125 + 66				9	"The majority of subjects displayed "moderate" (50%) or "slight" (25%) response to treatment at investigator assessment. Treatment of the periorbital region was reported more effective than the nasolabial region. At 12-week follow-up, 91% of subjects reported improved skin tone, and 82% reported enhanced smoothness of skin in the treatment area."	PubMed
Skin	Acne vulgaris		Lee	Korea (Seoul)	2007	Lasers Surg Med	Blue and red light combination LED phototherapy for acne vulgaris in patients with skin phototype IV.	Human	LED phototherapy (w/ blue light)	415 + 633								"Blue and red light combination LED phototherapy is an effective, safe and non-painful treatment for mild to moderately severe acne vulgaris, particularly for papulopustular acne lesions."	PubMed
Skin	Rejuvenation		Lee	Korea (Seoul)	2007	J Photochem Photobiol B	A prospective, randomized, placebo-controlled, double-blinded, and split-face clinical study on LED phototherapy for skin rejuvenation: clinical, profilometric, histologic, ultrastructural, and biochemical evaluations and comparison of three different treatment settings.	Human split-face study	Skin rejuvenation (wrinkles etc) LED phototherapy	830 633 or both	0.055 0.105			66 126		1200	8	"Our study results showed that LED phototherapy is an effective treatment for skin rejuvenation through objectively measured data and histological and ultrastructural bodies of evidence of increased collagen and elastic fibers as well as clinical photographs and double-blinded assessment of the investigators and the subjects."	PubMed
Stem cells & regeneration	Bone marrow stem cells		Li & Leu	Taiwan	2007	Conf Proc IEEE Eng Med Biol Soc	Effects of low level red-light irradiation on the proliferation of mesenchymal stem cells derived from rat bone marrow.	In vitro	LED phototherapy	630		0.005 0.010 0.015		2 or 4				"The results showed that the proliferation of MSCs plated at the low density (100 cells/well) and high density (1000 cells/well) was enhanced by multiple exposures of red-light LED treatment. The rate of proliferation of MSCs plated at the high density was not as high as those plated at the low density. The optimal parameter for LLLI was at irradiance of 15 mW/cm2, and radiant exposure of 4 J/cm2…	PubMed
Wound healing	Wounds		Corazza	Brazil (São Carlos)	2007	Photomed Laser Surg	Photobiomodulation on the angiogenesis of skin wounds in rats using different light sources.	Rat	Angiogenesis Biphasic dose response LED phototherapy LED vs LLLT	660 (LLLT) 635 (LED)	40 90			5 20 5 20	0.04 cm2 0.085 cm2			"On days 3, 7, and 14, the proliferation of blood vessels in all irradiated groups was superior in comparison to those of the control group (p < 0.05). Treatment with fluence of 5 J/cm(2) was better than the laser group with 20 J/cm(2) on day 21." "Red LLLT and LED demonstrated expressive results in angiogenesis. Light coherence was shown not to be essential to angiogenesis."	PubMed
Cells	Protection		Liang	USA (Milwaukee, WI)	2006	Neuroscience	Photobiomodulation partially rescues visual cortical neurons from cyanide-induced apoptosis.	In vitro	Neurotoxins LED phototherapy									"These results indicate that light-emitting diode pretreatment partially protects neurons against cyanide-induced caspase-mediated apoptosis, most likely by decreasing reactive oxygen species production, down-regulating pro-apoptotic proteins and activating anti-apoptotic proteins, as well as increasing energy metabolism in neurons as reported previously."	PubMed
Dermatology	Herpes labialis		Hargate	UK (Middlesbrough)	2006	Clin Exp Dermatol	A randomised double-blind study comparing the effect of 1072-nm light against placebo for the treatment of herpes labialis	Human RCT/DB	LED phototherapy	1072								"The 1072-nm light-emitting diode device reduced cold-sore healing time to 6.3 days compared with 9.4 days for placebo (P = 0.048)."	PubMed
Development	Embryogenesis		Yeager	USA (Bloomington, IN)	2006	J Biochem Mol Toxicol	670 nanometer light treatment attenuates dioxin toxicity in the developing chick embryo.	Chick embryo	LED phototherapy	670								"Our study demonstrates that 670 nm phototherapy can mitigate the oxidative stress and energy deficit resulting from developmental exposure to TCDD while reducing TCDD-induced embryo mortality. Moreover, LED treatment restores hepatic enzyme activities to control levels in TCDD-exposed embryos. The effective attenuation of TCDD-induced embryo toxicity by LED treatment could extend to mitigating t…	PubMed
Development	Embryogenesis		Yeager	USA (Bloomington, IN)	2006	Photomed Laser Surg	Survivorship and mortality implications of developmental 670-nm phototherapy: dioxin co-exposure.	Chicken	LED phototherapy	670								"LED therapy decreased the embryonic mortality rate by 41%, resulting in increased embryonic survival and improved hatching success in eggs exposed to 200 ppt dioxin. However, at sub-lethal dioxin concentrations and in oil-treated controls, LED therapy slightly increased mortality."	PubMed
Development	Embryogenesis		Yeager	USA (Bloomington, IN)	2006	Photomed Laser Surg	Brief report: embryonic growth and hatching implications of developmental 670-nm phototherapy and dioxin co-exposure.	Chicken	LED phototherapy Dioxin	670	500 min	0.05 min		4	10 cm2 (beam)		20	"Size and hatching times suggest that the hatching success and preparedness of chicks developmentally exposed to dioxin concentrations above the lethality threshold is improved by 670-nm LED treatment administered throughout the gestation period, but the relationship may be complicated by an LED-oil interaction."	PubMed
General	LED		Kontoes	Greece & Spain & Japan	2006	Laser Ther	Phototherapy: medicine for the new millennium	Review	LED phototherapy	"Perhaps an even greater potential for LED therapy exists in its being incorporated into our conventional clinical practice as an adjunctive treatment to improve our already good results, particularly when the cost-effectiveness of these systems is considered. Some of the mechanisms by which this athermal and atraumatic light source can beneficially affect targeted tissues have already been eluci…									J-STAGE
General	LED		Desmet	USA (Milwaukee, WI)	2006	Photomed Laser Surg	Clinical and experimental applications of NIR-LED photobiomodulation.	Review	LED phototherapy	"NIR-LED light treatment stimulates the photoacceptor cytochrome c oxidase, resulting in increased energy metabolism and production. NIR-LED light treatment accelerates wound healing in ischemic rat and murine diabetic wound healing models, attenuates the retinotoxic effects of methanol-derived formic acid in rat models, and attenuates the developmental toxicity of dioxin in chicken embryos. Furt…									PubMed
Muscle	Exercise		Vinck	Belgium (Ghent)	2006	Lasers Med Sci	Pain reduction by infrared light-emitting diode irradiation: a pilot study on experimentally induced delayed-onset muscle soreness in humans.	Human RCT/SB (?)	LED phototherapy	950	160			3.2	18 cm2	360		"Statistical analysis (a general linear model followed by post hoc least significant difference) revealed no apparent significant analgesic effects of LED at the above-described light parameters and treatment procedure for none of the three outcome measures. However, as the means of all VAS and MPT variables disclose a general analgesic effect of LED irradiation in favour of the experimental grou…	PubMed
Muscle	Exercise		Douris	USA (Old Westbury, NY)	2006	Photomed Laser Surg	Effect of phototherapy on delayed onset muscle soreness.	Human RCT/DB	SLED phototherapy	660+ 880				8			5	"The experimental group exhibited a significant decrease in pain associated with DOMS compared to the control (p=0.01) and sham groups (p=0.03) based upon the VAS at the 48-h period. The McGill Pain Questionnaire showed a significant difference in pain scores at the 48-h period between the experimental and the sham groups (p=0.01). There were no significant differences day to day and between the …	PubMed
Nerves	Diabetic neuropathy		Arnall	USA (Johnson City, TN)	2006	Acta Diabetol	The restorative effects of pulsed infrared light therapy on significant loss of peripheral protective sensation in patients with long-term type 1 and type 2 diabetes mellitus.	Human	LED phototherapy LED cluster	650 880								"PILT improved peripheral protective sensation (PPS) even in patients with long-standing chronic neuropathies whose initial pre-study sensation was not measurable with a 200-g SWM. PILT significantly improves PPS. While the exact mechanism of action is not understood, infrared light may improve peripheral neuropathies by improving foot perfusion by stimulating nitric oxide production." Comment: P…	PubMed
Oral	Oral mucositis		Corti	Italy (Padua)	2006	Photomed Laser Surg	Treatment of chemotherapy-induced oral mucositis with light-emitting diode.	Human	LED phototherapy Intraoral	645	2017-08-07			0.99			21 (?)	"This pilot study shows that LED treatment is safe and capable of reducing the duration of chemotherapy-induced mucositis. This result needs to be confirmed in an adequate phase III study."	PubMed
Skin	Laser skin resurfacing wounds / erythema		Trelles & Allones	Spain (Cambrils)	2006	J Cosmet Laser Ther	Red light-emitting diode (LED) therapy accelerates wound healing post-blepharoplasty and periocular laser ablative resurfacing.	Human	LED phototherapy	633				96		1200		"In all instances, the LED therapy-treated side was statistically significantly superior to the unirradiated control by a factor of two to three." "In this small series of 10 patients, red LED phototherapy after blepharoplasty and laser ablative resurfacing cut the time to resolution of side effects and the healing time by one-half to one-third compared with contralateral unirradiated controls. F…	PubMed
Skin	Acne vulgaris		Goldberg & Russell	USA (New York, NY)	2006	J Cosmet Laser Ther	Combination blue (415 nm) and red (633 nm) LED phototherapy in the treatment of mild to severe acne vulgaris.	Human	LED phototherapy (w/ blue light)										PubMed
Wound healing	Wounds		Al-Watban & Andres	Saudi Arabia (Riyadh)	2006	Photomed Laser Surg	Polychromatic LED in oval full-thickness wound healing in non-diabetic and diabetic rats.	Rat	LED phototherapy Biphasic dose response Diabetic rats Broadband light	510- 543 + 594- 599 + 626- 639 + 640- 670 + 842- 879	272			5 10 20 30				"The effect of polychromatic LED therapy in oval full-thickness wound-healing in the diabetic model with the use of 5 and 10 J/cm(2) is promising. Further studies to determine optimum dosimetry and efficacy of LEDs are recommended."	PubMed
Wound healing	Wounds		Klebanov	Russia (Moscow)	2006	Biophysics	A comparative study of the effects of laser and LED radiation on lipid peroxidation in rat wound fluid	Rat	Wound exudate lipid peroxidation LED phototherapy LLLT vs LED Coherence	630 (LED) 632 (laser)								"It was concluded that irradiation with light of both laser and LED decreases the level of oxidative stress in wound fluid and that radiation coherence does not play a significant role."	PubMed
Development	Embryogenesis		Yeager	USA (Bloomington, IN)	2005	Photomed Laser Surg	Effects of 670-nm phototherapy on development.	Chicken	LED phototherapy	670				4			20	"These results indicate that 670-nm phototherapy by itself does not adversely affect developing embryos and may improve the hatching survival rate."	PubMed
Nerves	Electrical activity		Vinck	Belgium (Ghent)	2005	Lasers Med Sci	Evidence of changes in sural nerve conduction mediated by light emitting diode irradiation.	Human RCT	LED phototherapy	950	160				18 cm2			"Statistical analysis (general regression nodel for repeated measures) of NCV and NPL difference scores, revealed a significant interactive effect for both NCV (P=0.003) and NPL (P=0.006). Further post hoc LSD analysis showed a time-related statistical significant decreased NCV and an increased NPL in the experimental group and a statistical significant difference between placebo and experimental…	PubMed
Nerves	Diabetic neuropathy		Clifft	USA (Memphis, TN)	2005	Diabetes Care	The effect of monochromatic infrared energy on sensation in patients with diabetic peripheral neuropathy: a double-blind, placebo-controlled study.	Human RCT/DB	MIRE treatment with "Anodyne" LED pad device LED phototherapy	890								"Thirty minutes of active MIRE applied 3 days per week for 4 weeks was no more effective than placebo MIRE in increasing sensation in subjects with diabetic peripheral neuropathy. Clinicians should be aware that MIRE may not be an effective modality for improving sensory impairments in patients with diabetic neuropathy." Note: A comment to this study was published by Burke, who argued that the ne…	PubMed
Skin	Rejuvenation		Weiss	USA (Hunt Valley, MD)	2005	Lasers Surg Med	Clinical trial of a novel non-thermal LED array for reversal of photoaging: clinical, histologic, and surface profilometric results.	Human	LED phototherapy	590				0.1				"Skin textural improvement by digital imaging and surface profilometry is accompanied by increased collagen I deposition with reduced MMP-1 (collagenase) activity in the papillary dermis. This technique is a safe and effective non-painful non-ablative modality for improvement of photoaging."	PubMed
Skin			Weiss	USA (Maryland)	2005	Dermatol Surg	Clinical experience with light-emitting diode (LED) photomodulation.	Case series	LED phototherapy	590								"LED photomodulation has been used alone for skin rejuvenation in over 300 patients but has been effective in augmentation of results in 600 patients receiving concomitant nonablative thermal and vascular treatments such as intense pulsed light, pulsed dye laser, KTP and infrared lasers, radiofrequency energy, and ablative lasers." "LED photomodulation reverses signs of photoaging using a new non…	PubMed
Skin	Rejuvenation		Russell	USA	2005	J Cosmet Laser Ther	A study to determine the efficacy of combination LED light therapy (633 nm and 830 nm) in facial skin rejuvenation.	Human	LED phototherapy Omnilux LED device	633 + 830			125 + 66					"Key profilometry results Sq, Sa, Sp and St showed significant differences at week 12 follow-up; 52% of subjects showed a 25%-50% improvement in photoaging scores by week 12; 81% of subjects reported a significant improvement in periorbital wrinkles on completion of follow-up."	PubMed
Nerves	Diabetic neuropathy		Zinman	Canada (Toronto)	2004	Diabetes Care	Low-intensity laser therapy for painful symptoms of diabetic sensorimotor polyneuropathy: a controlled trial.	Human RCT/DB	MIRE treatment with "Anodyne" LED pad device LED phototherapy									"Although an encouraging trend was observed with LILT, the study results do not provide sufficient evidence to recommend this treatment for painful symptoms of DSP." Jan Tuner's comment: "Unfortunately, this study cannot be evaluated since the documentation of the actual laser parameters is poor. The only information given about these essential facts is "The LILT device had a wavelength of 905 nm…	PubMed
Nerves	Diabetic neuropathy		Powell	USA (Springdale, AR)	2004	Adv Skin Wound Care	Reversal of diabetic peripheral neuropathy and new wound incidence: the role of MIRE.	Human Retrospective	MIRE treatment with "Anodyne" LED pad device LED phototherapy									"After reversal of diabetic peripheral neuropathy following treatment with monochromatic near infrared photo energy, only 1 of 68 patients developed a new diabetic foot wound, for an incidence of 1.5%. Comparatively, the incidence previously reported in the Medicare-aged population with diabetes was 7.3%." Comment: Parameters were not reported at all.	PubMed
Nerves	Diabetic neuropathy		Leonard	USA (Clearwater, FL)	2004	Diabetes Care	Restoration of sensation, reduced pain, and improved balance in subjects with diabetic peripheral neuropathy: a double-blind, randomized, placebo-controlled study with monochromatic near-infrared treatment.	Human RCT/DB	MIRE treatment with "Anodyne" LED pad device LED phototherapy	890								"ATS treatments improve sensation in the feet of subjects with DPN, improve balance, and reduce pain."	PubMed
Skin	Rejuvenation		Weiss	USA (Hunt Valley, MD)	2004	J Drugs Dermatol	A novel non-thermal non-ablative full panel LED photomodulation device for reversal of photoaging: digital microscopic and clinical results in various skin types.	Human	Gentlewaves device LED phototherapy	590								"Results showed improvement of signs of photoaging in 90%. The majority of patients demonstrated improvement in peri-ocular wrinkles, reduction in Fitzpatrick photoaging classification, global skin texture and background erythema, and pigmentation. No side effects were noted. LED photomodulation is a safe and effective non-painful non-ablative modality for improvement of photoaging."	PubMed
Cells	Proliferation		Vinck	Belgium (Ghent)	2003	Lasers Med Sci	Increased fibroblast proliferation induced by light emitting diode and low power laser irradiation.	In vitro	Fibroblasts LED phototherapy LLLT vs LED	830 Laser 570 660 950 LED								"Statistical analysis revealed a higher rate of proliferation (p < 0.001) in all irradiated cultures in comparison with the controls. Green light yielded a significantly higher number of cells, than red (p < 0.001) and infrared LED light (p < 0.001) and than the cultures irradiated with the LLL (p < 0.001); the red probe provided a higher increase (p < 0.001) than the infrared LED probe and than …	PubMed
Diabetes mellitus	Ulcers and wounds		Al-Watban & Andres	Saudi Arabia (Riyadh)	2003	J Clin Laser Med Surg	Polychromatic LED therapy in burn healing of non-diabetic and diabetic rats.	Rat	Diabetic rats LED phototherapy	510- 543 + 594- 599 + 626- 639 + 640- 670 + 842- 879	272							"Burn healing was impaired significantly during diabetes by -46.17%. Polychromatic LED treatment using 5, 10, 20, and 30 J/cm2 incident doses influenced healing by 6.85%, 4.93%, -4.18%, and -5.42% in the non-diabetic rats; and 73.87%, 76.77%, 60.92%, and 48.77% in the diabetic rats, relative to their controls, respectively." "The effect of polychromatic LED in non-diabetic rats was insignificant;…	PubMed
Eyes	Methanol toxicity		Eells	USA (Milwaukee, WI)	2003	Proc Natl Acad Sci U S A	Therapeutic photobiomodulation for methanol-induced retinal toxicity.	Rat	Methanol toxicity LED phototherapy	670				4		144	3	"Our studies document a significant recovery of rod- and cone-mediated function in LED-treated, methanol-intoxicated rats. We further show that LED treatment protected the retina from the histopathologic changes induced by methanol-derived formate. These findings provide a link between the actions of monochromatic red to near-IR light on mitochondrial oxidative metabolism in vitro and retinoprote…	PubMed
Oral	Oral mucositis		Whelan	USA (Milwaukee, WI)	2002	J Clin Laser Med Surg	NASA light-emitting diodes for the prevention of oral mucositis in pediatric bone marrow transplant patients.	Human	LED phototherapy	670				4				"The incidence of UOM was 53%, compared to an expected rate of 70-90%. There was also a 48% and 39% reduction of treated left and right buccal pain, respectively, compared to untreated throat pain at about posttransplant day 7 (p < 0.05). There were no significant differences between sides in OMI or pain." "Although more studies are needed, LED therapy appears useful in the prevention of OM in pe…	PubMed
Wound healing	Venous ulcer		Lagan	UK (Jordanstown, Northern Ireland)	2002	J Clin Laser Med Surg	Low-intensity laser therapy/combined phototherapy in the management of chronic venous ulceration: a placebo-controlled study.	Human SB	LED array? (31 diodes)	660- 950	532							"Although there was no statistically significant difference between Treatment and Placebo groups, an apparent clinical difference in wound healing rate was noted; at postirradiation, a continued reduction in wound size was evident for the treatment group. These effects were believed to be due to an apparent delayed effect. There was no statistically significant difference between groups for pain."	PubMed
Wound healing	Wounds		Whelan	USA (Milwaukee, WI)	2002	J Clin Laser Med Surg	Effect of NASA light-emitting diode irradiation on molecular changes for wound healing in diabetic mice.	Mouse	LED phototherapy Diabetic mice	670								"Our studies have revealed certain tissue regenerating genes that were significantly upregulated upon LED treatment when compared to the untreated sample. Integrins, laminin, gap junction proteins, and kinesin superfamily motor proteins are some of the genes involved during regeneration process." "We believe that the use of NASA light-emitting diodes (LED) for light therapy will greatly enhance t…	PubMed
Cells	Protection		Wong-Riley	USA (Milwaukee, WI)	2001	Neuroreport	Light-emitting diode treatment reverses the effect of TTX on cytochrome oxidase in neurons.	In vitro	Neurotoxins LED phototherapy									670nm LED light protected cultured primary neurons against tetrodotoxin (TTX).	PubMed
Dermatology	Herpes labialis		Dougal & Kelly	UK (Stockton-on-Tees)	2001	Clin Exp Dermatol	A pilot study of treatment of herpes labialis with 1072 nm narrow waveband light	Human Pilot study	LED phototherapy vs aciclovir	1072							1	"The results demonstrated that a single 5 min light treatment significantly reduced cold sore healing time by 4 days; 1072 nm light healed cold sores in 4.3 ± 1.8 days (mean ± SD) as compared with aciclovir applied five times daily, 8.5 ± 3.0 days (P < 0.0001)."	PubMed
Oral	Oral mucositis		Whelan	USA (Milwaukee, WI)	2001	J Clin Laser Med Surg	Effect of NASA light-emitting diode irradiation on wound healing.	Human	LED phototherapy	670								"LED produced a 47% reduction in pain of children suffering from oral mucositis."	PubMed
Wound healing	Wounds		Lowe	UK (Jordanstown, Northern Ireland)	1998	Lasers Surg Med	Effect of low intensity monochromatic light therapy (890 nm) on a radiation-impaired, wound-healing model in murine skin.	Mouse	X-rays (20 Gy) LED phototherapy? (Anodyne)	890	300			0.18 0.54 1.45				"These findings provide little evidence of the putative stimulatory effects of monochromatic light irradiation in vivo, but, rather, reveal the potential for an inhibitory effect at higher radiant exposures." Note: A comment was published by Tiina Karu.	PubMed
Respiratory system	Allergic rhinitis		Neuman&Finkelstein	Israel (Petah Tikva)	1997	Ann Allergy Asthma Immunol	Narrow-band red light phototherapy in perennial allergic rhinitis and nasal polyposis.	Human RCT/DB (?)	Allergic rhinitis Nasal polyposis LED phototherapy BioNase LED light	660	4		1			260	42	"Allergic rhinitis, if uncomplicated by polyps or chronic sinusitis, can be effectively treated by narrow-band red light illumination of the nasal mucosa at 660 nm, with marked alleviation of clinical symptoms." Comment: If I remember correctly, the sham group results in abstract contradict a little bit with the results presented in full text (improvement in 3% vs 21%). Comment: The sham-controll…	PubMed
Pain	Analgesia		Laakso		1994	Laser Ther	Plasma acth and β-endorphin levels in response to low level laser therapy (lllt) for myofascial trigger points	Human	LLLT vs LED	660 (LED) 670 (laser) 820 (laser)			2018-05-01					"ACTH was shown to have a cumulative response to treatment with 1 J/cm2 infrared laser (p < 0.001) and 5 J/cm2 red laser (p < 0.05) responding significantly. β-endorphin was noted to be significantly elevated between days one and four (p < 0.05) in subjects who received IR (5 J/cm2) laser. Results indicated that the analgesic response to phototherapy may be mediated through hormonal/opioid mechan…	J-STAGE
Wound healing	Wounds		Mashiko	Japan (Sendai)	1984	Nippon Laser Igakkaishi	Effect of near-infrared light irradiation on wound healing using high power light emitting diodes	Guinea Pig	LED phototherapy Polarization	803	30							"Appreciable difference of wound healing could not be detected between the non-polarized light irradiation group and the non-irradiated group. However, in those with the linearly polarized light irradiation, the duration of wound healing became significantly shortened. Hence, we could confirm a qualitative difference of its effect on wound healing between the groups irradiated by the non-polarize…	J-STAGE
Skin	Psoriasis		Ho	?		J Drugs Dermatol	A Systematic Review of Light Emitting Diode (LED) Phototherapy for Treatment of Psoriasis: An Emerging Therapeutic Modality.	Systematic review	LED phototherapy	"5 original articles met inclusion criteria for our review. Grade of recommendation: B for LED-blue light. Grade of recommendation: C for LED-ultraviolet B, LED-red light, and combination LED-near-infrared and LED-red light. Conclusion: We envision further characterizing the effects of LED phototherapy to treat psoriasis in patients may increase adoption of LED-based modalities and provide clinic…									PubMed
